# Supplementary material for: The effect of lowering the legal blood alcohol concentration limit on driving under the influence (DUI) in southern Taiwan: a cross-sectional retrospective analysis
Source: PubMed Central journal article supplement — BMJ Open. 2019 Apr 20;9(4):e026481. doi: 10.1136/bmjopen-2018-026481 (PMC6528014; doi:10.1136/bmjopen-2018-026481), 2019-04-20
Supplement: bmjopen-2018-026481.draft_revisions.pdf [file bmjopen-2018-026481.draft_revisions.pdf]

# BMJ Open

BMJ Open is committed to open peer review. As part of this commitment we make the peer review history of every article we publish publicly available.

When an article is published we post the peer reviewers' comments and the authors' responses online. We also post the versions of the paper that were used during peer review. These are the versions that the peer review comments apply to.

The versions of the paper that follow are the versions that were submitted during the peer review process. They are not the versions of record or the final published versions. They should not be cited or distributed as the published version of this manuscript.

BMJ Open is an open access journal and the full, final, typeset and author-corrected version of record of the manuscript is available on our site with no access controls, subscription charges or pay-per-view fees (<http://bmjopen.bmj.com>).

If you have any questions on BMJ Open's open peer review process please email [editorial.bmjopen@bmj.com](mailto:editorial.bmjopen@bmj.com)

# BMJ Open

## The effect of lowering the legal blood alcohol concentration limit on driving under the influence (DUI) in southern Taiwan – a cross-sectional retrospective analysis

|                               |                                                                                                                                                                                                                                                                                                                                                                                                                                                                                                                                                                                                                                                                                                                                                                                                                                                                                                                                                                                |
|-------------------------------|--------------------------------------------------------------------------------------------------------------------------------------------------------------------------------------------------------------------------------------------------------------------------------------------------------------------------------------------------------------------------------------------------------------------------------------------------------------------------------------------------------------------------------------------------------------------------------------------------------------------------------------------------------------------------------------------------------------------------------------------------------------------------------------------------------------------------------------------------------------------------------------------------------------------------------------------------------------------------------|
| Journal:                      | <i>BMJ Open</i>                                                                                                                                                                                                                                                                                                                                                                                                                                                                                                                                                                                                                                                                                                                                                                                                                                                                                                                                                                |
| Manuscript ID                 | bmjopen-2018-026481                                                                                                                                                                                                                                                                                                                                                                                                                                                                                                                                                                                                                                                                                                                                                                                                                                                                                                                                                            |
| Article Type:                 | Research                                                                                                                                                                                                                                                                                                                                                                                                                                                                                                                                                                                                                                                                                                                                                                                                                                                                                                                                                                       |
| Date Submitted by the Author: | 07-Sep-2018                                                                                                                                                                                                                                                                                                                                                                                                                                                                                                                                                                                                                                                                                                                                                                                                                                                                                                                                                                    |
| Complete List of Authors:     | Tsai, Yu-Chin; Kaohsiung Chang Gung Memorial Hospital and Chang Gung University College of Medicine, Department of Neurosurgery<br>Huang, Jin-Fu; Kaohsiung Chang Gung Memorial Hospital and Chang Gung University College of Medicine, Department of Neurosurgery<br>Kuo, Spencer C.H.; Kaohsiung Chang Gung Memorial Hospital and Chang Gung University College of Medicine, Department of Plastic Surgery<br>Rau, Cheng-Shyuan; Kaohsiung Chang Gung Memorial Hospital and Chang Gung University College of Medicine, Department of Neurosurgery<br>Chien, Peng-Chen; Kaohsiung Chang Gung Memorial Hospital and Chang Gung University College of Medicine, Department of Plastic Surgery<br>Hsieh, Hsiao-Yun; Kaohsiung Chang Gung Memorial Hospital and Chang Gung University College of Medicine, Department of Plastic Surgery<br>Hsieh, Ching-Hua; Kaohsiung Chang Gung Memorial Hospital and Chang Gung University College of Medicine, Department of Plastic Surgery |
| Keywords:                     | driving under the influence, alcohol, mortality, helmet use, airbag                                                                                                                                                                                                                                                                                                                                                                                                                                                                                                                                                                                                                                                                                                                                                                                                                                                                                                            |
|                               |                                                                                                                                                                                                                                                                                                                                                                                                                                                                                                                                                                                                                                                                                                                                                                                                                                                                                                                                                                                |

SCHOLARONE™  
Manuscripts

1  
2  
3 **The effect of lowering the legal blood alcohol concentration limit on driving**  
4 **under the influence (DUI) in southern Taiwan – a cross-sectional retrospective**  
5 **analysis**  
6  
7  
8

9 Yu-Chin Tsai<sup>1</sup>, MD., M.Sc.; Jin-Fu Huang<sup>1</sup>, MD.; Spencer C.H. Kuo<sup>2</sup>, M.D.;  
10 Cheng-Shyuan Rau<sup>1</sup>, M.D.; Peng-Chen Chien<sup>2</sup>, M.Sc. Hsiao-Yun Hsieh<sup>2</sup>, M.Sc.;  
11 Ching-Hua Hsieh<sup>2</sup>, M.D., PhD.  
12  
13  
14  
15

16  
17  
18 <sup>1</sup> Department of Neurosurgery, Kaohsiung Chang Gung Memorial Hospital and Chang  
19 Gung University College of Medicine, Taiwan  
20

21  
22 <sup>2</sup> Department of Plastic Surgery, Kaohsiung Chang Gung Memorial Hospital and  
23 Chang Gung University College of Medicine, Taiwan  
24  
25  
26

27  
28  
29 Yu-Chin Tsai; e-mail: [vagility@gmail.com](mailto:vagility@gmail.com)

30  
31 Jin-Fu Huang; e-mail: [stillloop@gmail.com](mailto:stillloop@gmail.com)

32  
33 Spencer C.H. Kuo; e-mail: [spenc19900603@gmail.com](mailto:spenc19900603@gmail.com)

34  
35 Cheng-Shyuan Rau; e-mail: [ersh2127@cloud.cgmh.org.tw](mailto:ersh2127@cloud.cgmh.org.tw)

36  
37 Peng-Chen Chien; e-mail: [VENU\\_CHIEN@hotmail.com](mailto:VENU_CHIEN@hotmail.com)

38  
39 Hsiao-Yun Hsieh; e-mail: [sylvia19870714@hotmail.com](mailto:sylvia19870714@hotmail.com)

40  
41 Ching-Hua Hsieh; e-mail: [m93chinghua@gmail.com](mailto:m93chinghua@gmail.com)  
42  
43  
44  
45

46 Corresponding author: Ching-Hua Hsieh, M.D., PhD., FACS.

47  
48 Department of Plastic Surgery, Kaohsiung Chang Gung Memorial Hospital and Chang  
49 Gung University College of Medicine, Taiwan  
50

51  
52 No.123, Ta-Pei Road, Niao-Song District, Kaohsiung City 833, Taiwan  
53

54  
55 Tel: 886-7-3454746; E-mail: [m93chinghua@gmail.com](mailto:m93chinghua@gmail.com)  
56  
57

**ABSTRACT**

**Objectives:** To profile the epidemiological changes of driving under the influence (DUI) in southern Taiwan after lowering the legal blood alcohol concentration (BAC) limit from 50 to 30 mg/dL In 2013.

**Setting:** Level 1 trauma medical center in southern Taiwan.

**Participants:** Data from 7,447 patients (4,375 males and 3,072 females) were retrieved from the Trauma Registry System of a single trauma center to examine DUI status, patient characteristics, and accident-related factors before and after the sanction change. The factors include gender, age, vehicle type, airbag use in car accidents and helmet use in motorcycle accidents, time of accident, BAC, Abbreviated Injury Score (AIS), injury severity score (ISS), and mortality.

**Results:** Our results indicated that the percentage of DUI patients declined from 10.99% (n=373) to 6.64% (n=269) with the lowered BAC limit. Use of airbags in car accidents (OR: 0.30, 95% CI: 0.10-0.88,  $p = 0.007$ ) and helmet use in motorcycle accidents (OR: 0.20, 95% CI: 0.15-0.26,  $p < 0.001$ ) was less in DUI patients compared to that in non-DUI patients after sanction change with significant negative correlation. DUI behavior increased accident mortality risk before the sanction (OR: 4.33, 95% CI: 2.20-8.54) and even more so after the sanction (OR: 5.60, 95% CI: 3.16-9.93). The difference in OR for mortality before and after the sanction was not significant ( $p = 0.568$ ).

**Conclusion:** This study revealed that lowering the BAC limit to 30 mg/dL significantly reduced the number of DUI events, but failed to result in a significant reduction in mortality in these trauma patients.

**Keywords** driving under the influence; alcohol; mortality; helmet use; airbag

**Strengths and limitations of this study**

1. This study revealed that, with the legal blood alcohol concentration limit lowered from 50 to 30 mg/dL, the percentage of patients driving under the influence of alcohol declined, the percentage of airbag use in car accidents decreased, while helmet use in motorcycle accidents increased.
2. However, the lowering legal blood alcohol concentration limit from 50 to 30 mg/dL did not significantly reduce the odds of mortality in the patients after sanction change.
3. This study was limited by its retrospective design and the data collected from one level I regional trauma center.

## INTRODUCTION

According to the World Health Organization (WHO), over 1.2 million people die each year in road traffic accidents, with 75% of road traffic fatalities occurring in men in the economically active age ranges<sup>1</sup>. It is estimated that over 90% of road traffic deaths occur in low-income and middle-income countries, causing significant GDP losses of up to 5%<sup>2</sup>. Alcohol intoxication has been proposed as one of the primary causes of all road accidents. Driving under the influence (DUI) of alcohol increases the risk of accident as well as the severity of the accident injury, and results in longer hospital stays, higher healthcare costs, and poorer outcomes compared to drivers in non-DUI accidents<sup>3-6</sup>. When the driver's blood alcohol concentration (BAC) exceeds 50 mg/dL, the risk and severity of traffic accidents increase remarkably<sup>7-10</sup>.

To reduce alcohol-impaired driving, stricter laws have been implemented including minimum legal drinking ages, taxes on beer, BAC limits, the provision of alcohol education, and the establishment of drug and alcohol treatment programs<sup>11</sup>. Based on the deterrence theory, changes to existing sanctions, such as the lowering of BAC limits, are commonly used to reduce DUI. DUI-related traffic accidents have caused over 3000 deaths and approximately 110,000 injuries in Taiwan over the past decade (2007-2016)<sup>12</sup>. Nevertheless, DUI was not deemed a serious crime prior to April 1999. It was legal to drive with breath alcohol content (BrAC) of up to 0.25 mg/L (i.e., BAC of 50 mg/dL). Drivers with BrAC between 0.25 and 0.55 mg/L (i.e., BAC between 50 and 110 mg/dL) would violate Road Traffic Security Rules, and would face license suspension, revocation, or pecuniary punishment. Only drivers with BrAC > 0.55 mg/L (i.e., BAC > 110 mg/dL) violated Article 185 of the Criminal Law, but would face imprisonment of less than a year and fines of less than New

Taiwan Dollars (NTD) 30,000 (~ US dollars 1,000).

In recent years, DUI has received increased media attention as alcohol-impaired traffic accidents are frequently reported. A series of amendments were made to the Road Traffic Management and Penalty Act, Road Traffic Security Rules, and Article 185 of the Criminal Law<sup>13</sup>, including the most recent amendment to Road Traffic Security Rules in 2013, which lowers the BrAC limit from 0.25 mg/L (BAC 50 mg/dL) to 0.15 mg/L (BAC 30 mg/dL). In addition, penalties were increased from NTD 15,000-60,000 (~ US \$500-2,000) to NTD 15,000-90,000 (~ US \$500-3,000). According to the national statistics, drunk-driving casualties reduced after these sanctions<sup>13</sup>. However, data on monthly injuries and deaths caused by DUI-related accidents and number of monthly DUI violations comes from sobriety checkpoints by the police. Specific data on the impact of DUI on medical service utilization after changes to sanctions are not available. The purpose of this study was to compare the epidemiological profile of DUI in southern Taiwan before (July 2009 to December 2012) and after (July 2013 to December 2016) the changes to sanctions using data from the Trauma Registry System. We examined the profiles of DUI patients before and after the sanction change, as well as DUI accident characteristics to define the prognosis and risk factors of DUI related injury and the effect of sanction change on these factors.

## PATIENTS AND METHODS

We conducted a retrospective study of patient data collected by the Trauma Registry System between July 2009 and December 2016 to investigate clinical outcomes and baseline features of DUI before and after changes to sanctions. Only patients who were drivers in car/motorcycle accidents that occurred in Kaohsiung and Pingtung areas of Taiwan and were hospitalized after their emergency room (ER) visit were included in the study. Patients with incomplete data were excluded, as well as those whose visit took place between January 2013 and June 2013, the period when amendments to the Road Traffic Management and Penalty Act were announced and implemented. This study was approved by the institutional review board (IRB) of the Kaohsiung Chang Gung Memorial Hospital (reference number 201701844B0), a 2686-bed facility and Level I regional trauma center that provides primary care to trauma patients primarily from southern Taiwan<sup>14,15</sup>. Data from 7,447 patients were used for the analysis.

BAC tests are ordered for patients in the ER with clinical suspicion of DUI. For the study, patients with BAC > 30 mg/dL (the threshold for DUI) were categorized into two groups according to when their visit took place: July 2009 to December 2012 (before increased sanctions; total 3,395 patients), and July 2013 to December 2016 (after increased sanctions; total 4,052 patients). Detailed patient information was retrieved from the Trauma Registry System of our institution, and included the following variables: age, gender, type of vehicle accident, time and location of accident, airbag use in car accidents, helmet use in motorcycle accidents, BAC, hospital length of stay (LOS), in-hospital mortality, and associated trauma in each body region. The Abbreviated Injury Score (AIS) was used to evaluate injury severity



1  
2  
3 in the following regions: head/neck, face, chest, abdomen, extremities (including  
4 pelvis), and external. Some groups of patients with higher AIS scores would be  
5 combined for analysis due to inadequate patient number. The Injury Severity Score  
6 (ISS) was calculated by summing the square of the three highest AIS scores in each  
7 region<sup>16</sup>.  
8  
9  
10  
11  
12  
13  
14  
15

16 Demographic traits and clinical variables were compared before and after  
17 sanction change using the Chi-square test, Student's *t*-test and Mann-Whiney U-test.  
18 Differences in parameters between DUI and non-DUI groups were also examined.  
19 Parameters were presented as numbers (percentage), median  $\pm$  interquartile range  
20 (IQR), or mean  $\pm$  standard deviation (SD). Logistic regression was used to define  
21 changes in baseline traits and clinical outcomes in the DUI and non-DUI groups  
22 before and after increased sanctions. Breslow-Day statistics testing was performed to  
23 examine homogeneity in different stratifications. R software (Version 3.3.3; package  
24 = cartography, method = choroLayer) was used to geographically present the change  
25 in the number of patients with DUI in southern Taiwan. The trend in the number of  
26 DUI patients from 2009 to 2016 was also demonstrated. All other analysis was  
27 performed using SAS software (Version 9.4). Statistical significance was defined as  $p$   
28  $< 0.05$ .  
29  
30  
31  
32  
33  
34  
35  
36  
37  
38  
39  
40  
41  
42  
43

#### 44 **PATIENT AND PUBLIC INVOLVEMENT**

45 Patients and or public were not involved please state this.  
46  
47  
48  
49

#### 50 **RESULTS**

51 A total of 7,447 patients, including 4,375 males and 3,072 females, were  
52 included in this study. The mean age at the time of accident was  $43.68 \pm 18.70$  (range:  
53  
54  
55  
56  
57  
58  
59  
60

1  
2  
3 11-90 years). Of these patients, 642 (8.6%) were classified as DUI according to the  
4 amended definition of  $BAC \geq 30$  mg/dL. The majority of the traffic accidents were  
5 motorcycle accidents (7,237 patients; 97.2%), and often happened between 6 AM – 2  
6 PM (3,173 patients; 42.6%). Motorcyclists were wearing a helmet at the time of the  
7 accident in 88.93% (n = 7,237) of the patients, whereas 63.81% (n = 134) of car  
8 drivers had airbag protection. The average mortality was 1.34%, and median hospital  
9 LOS was six days.  
10  
11  
12  
13  
14  
15  
16  
17  
18  
19

20 As shown in Table 1, 3,395 patients were sent to our ER before the sanction  
21 change and 4,052 patients after. In both time periods, patients tended to be males  
22 between the ages of 40-45. The percentage of DUI declined from 10.99% (n = 373) to  
23 6.64% (n = 269) after sanction, and the average BAC decreased from 21.19 mg/dL to  
24 12.31 mg/dL. The declining trend of monthly DUI patients after sanction change is  
25 depicted in Figure 1. This trend was observed across different regions in southern  
26 Taiwan, as shown in Figure 2. The percentage of airbag use in car accidents  
27 decreased, while helmet use in motorcycle accidents increased. No significant  
28 changes in mortality and hospital stay were found in our analysis. Patient numbers do  
29 not vary by season or day of the week, although a slight decrease was observed in the  
30 spring before sanction.  
31  
32  
33  
34  
35  
36  
37  
38  
39  
40  
41  
42  
43  
44  
45

46 Examination of demographic features and clinical outcomes in DUI and  
47 non-DUI patients revealed that patients in the DUI group were mostly male (88.47%)  
48 compared to the non-DUI group (55.94%) (Table 2). Patients in the DUI group were  
49 significantly younger than those in the non-DUI (p < 0.001) group. Reduced use of  
50 airbags in car accidents and helmets in motorcycle accidents was found in higher  
51  
52  
53  
54  
55  
56  
57  
58  
59  
60

1  
2  
3 proportion in the DUI group than in the non-DUI group. DUI patients tended to have  
4 significantly higher ISS (13 vs. 9, respectively,  $p < 0.001$ ) and longer hospital stay (8  
5 days vs. 6 days, respectively,  $p < 0.001$ ) than non-DUI patients. A significantly higher  
6 mortality rate was found in DUI patients than in non-DUI (4.67% vs. 1.03%,  
7 respectively,  $p < 0.001$ ). No significant seasonal differences were found in our  
8 analysis between the DUI and non-DUI groups. Time of visit to the ER differed for  
9 the DUI patients compared to the non-DUI patients. Most DUI patients visited ER  
10 between 10 PM and 6 AM (50.31%), while only 13.33% of non-DUI patients visited  
11 at this time. Additionally, DUI accidents tended to occur on weekends (18.69% on  
12 Saturday and 19.31% on Sunday).

13  
14  
15  
16  
17  
18  
19  
20  
21  
22  
23  
24  
25  
26  
27 Table 3 compares odds ratios (OR) for different stratified parameters before and  
28 after sanction. Males still showed increased risk of DUI (Crude OR 6.01, 95% CI:  
29 4.69-7.69), but sanction change showed no significant effect on gender in terms of  
30 DUI behavior. DUI behavior increased the accident mortality risk before sanction  
31 (OR: 4.33, 95% CI: 2.20-8.54), and even more so after sanction (OR: 5.60, 95% CI:  
32 3.16-9.93). Difference in OR of mortality before and after sanction change was not  
33 significant ( $p = 0.568$ ). Regarding time of accident, a greater number of DUI patients  
34 appeared between 10 PM and 6 AM (OR 12.70) than between 2 PM and 10 PM (3.04)  
35 and between 6 AM and 2 PM (baseline). This trend was significantly exaggerated  
36 after sanction, which showed OR of 20.76 in the period 10 PM - 6 AM and OR 5.50  
37 in the period 2 PM - 10 PM compared to the baseline OR in the period 6 AM - 2 PM.  
38 There was no significant correlation between airbag protection and DUI behavior in  
39 car accidents (OR 0.49, 95% CI: 0.20-1.18) before sanction. However, car accidents  
40 with airbag protection were less frequent in DUI patients than in non-DUI patients  
41  
42  
43  
44  
45  
46  
47  
48  
49  
50  
51  
52  
53  
54  
55  
56

1  
2  
3 after sanction (OR: 0.30, 95% CI: 0.10-0.88) with a significantly negative correlation.  
4  
5 Similar results were found in motorcycle accidents. Helmet use in motorcycle  
6  
7 accidents was a protective factor with a negative correlation to DUI behavior. This  
8  
9 negative correlation was reinforced by sanction change. The OR of helmet use and  
10  
11 DUI was 0.42 (95% CI: 0.32-0.55) before sanction and 0.30 (95% CI: 0.15-0.26) after  
12  
13 sanction with significant difference ( $p < 0.001$ ). Season of accident had no effect on  
14  
15 DUI behavior before sanction or after sanction. Workdays were significantly  
16  
17 negatively correlated with DUI behavior as compared to weekends (Saturday and  
18  
19 Sunday) both before and after sanction change.  
20  
21  
22  
23

24 The AIS of different regions were examined on DUI and non-DUI patients, and  
25  
26 they indicated that DUI patients were more susceptible to injuries to the head and  
27  
28 neck, face, thorax, and abdomen than non-DUI patients (Table 4). No significant  
29  
30 difference was found in the external injuries between DUI and non-DUI patients.  
31  
32 However, patients with DUI were less likely than non-DUI patients to suffer from  
33  
34 severe injury to the extremities.  
35  
36  
37  
38  
39  
40  
41  
42  
43  
44  
45  
46  
47  
48  
49  
50  
51  
52  
53  
54  
55  
56  
57  
58  
59  
60

## DISCUSSION

Our analysis presented various factors associated with DUI behavior, including gender, mortality, time of the day, day of the week, use of airbags in cars, and use of helmets among motorcyclists. In this study, females accounted for a minor proportion (12%) of DUI patients, consistent with previous research<sup>17</sup>. Complex causal relationships in physiological and social factors may account for the difference in males and females involved in DUI. Our previous studies also reported more males than females with traffic accidents sent to our emergency room<sup>14,18</sup>. Compared to females, males had a higher risk of motorcycle accidents<sup>19,20</sup>, which accounted for approximately 60% of injuries in southern Taiwan<sup>14,18</sup>. Male/female differences in alcoholic liver injury<sup>21</sup>, alcohol-induced brain injury<sup>22</sup>, and alcohol-related behavioral and medical problems have also been reported<sup>23-25</sup>. Increased vehicle performance and a higher number of safety features lead to greater risk-taking behavior by the driver<sup>26</sup>, and our results indicated that drivers using airbags in their vehicles show a significantly lower OR of being in a DUI accident. This finding could indicate a relationship between the value placed on safety (e.g., purchase cars with more safety features) and the avoidance of risk-taking behaviors such as DUI. Our study also examined helmet use in motorcyclists. It has been mandatory for motorcyclists in Taiwan to wear helmets since June 1997, and helmets were used by 90% of patients in this study. Previous studies have reported helmet use to be a protective factor or strong predictor of motorcycle accidents<sup>19,27-29</sup>. Our study also found that helmet use plays a significantly protective role in DUI accidents, supporting findings from Ohio, USA and Iran that suggest that motorcyclists involved in alcohol-involved crashes are significantly less likely to wear a helmet<sup>30,31</sup>.

1  
2  
3 Our analysis is consistent with findings in Taiwan based on national statistics<sup>13</sup>  
4 that report a significant reduction in DUI events after sanction change. Previous  
5 studies report reductions in both accidents and fatalities when legal limits for BAC are  
6 lowered to 50 mg/dL<sup>32,33</sup>. A significant decrease of 3.7% (95% CI: 0.9–6.5%) in  
7 fatally injured drivers with a BAC level equal to or greater than 50 mg/dL was found  
8 following the sanction change<sup>34</sup>. A recent meta-analysis examined the impact of  
9 lowering the legal BAC limit to 50 mg/dL, and found an 11.1% decrease in rates of  
10 fatal alcohol-related crashes<sup>35</sup>. In this study, the proportion of male and female DUI  
11 patients and overall mortality rate did not change after the sanction change. However,  
12 while the proportions of males and females did not change, other elements of the  
13 patient composition changed with BAC 30 mg/dL. In our study, the percentage of  
14 DUI patients decreased from 11.0% to 6.6% and was accompanied by a decline in  
15 average BAC. The decline in DUI events can be seen in the different geographical  
16 regions of Kaohsiung and Pingtung surrounding our hospital. Time of injury appears  
17 to play a role in severity of injury. It has been reported that drivers not under the  
18 influence of alcohol suffer more severe injuries between midnight and early morning  
19 compared to early night-time<sup>36</sup>. Findings from other studies have indicated that  
20 injuries involving drunk drivers are influenced less by geographic and environmental  
21 factors than by the nature of collision and time of accident<sup>37</sup>. Our results indicate  
22 different temporal distribution (in weekday and time of day, but not in seasons) in the  
23 DUI and non-DUI groups. Most non-DUI patients visited the ER between early  
24 morning and afternoon (6 AM – 2 PM), but DUI patients tend to search for medical  
25 aid between 10 PM to 6 AM (50.31%). A previous study in Hong Kong indicated a  
26 similar temporal pattern in DUI using a slightly different time framework<sup>38</sup>. This  
27 study found that most DUI events occurred between 3 PM – 11 PM (39.5%) and 11  
28  
29  
30  
31  
32  
33  
34  
35  
36  
37  
38  
39  
40  
41  
42  
43  
44  
45  
46  
47  
48  
49  
50  
51  
52  
53  
54  
55  
56

1  
2  
3 PM - 7 AM (29.8%). Consistent with our findings, a higher prevalence of DUI on  
4  
5 weekends than on weekdays is reported in other studies<sup>39</sup>.  
6  
7

8  
9 Although our study found that DUI events significantly decreased after sanction  
10 change, the increased point estimate for OR of DUI on mortality was not significant.  
11 Studies have shown that alcohol impairs driving ability, and that the intoxicated driver  
12 is more likely to cause fatal road traffic accidents<sup>40</sup>, while other research has found  
13 the risk of mortality is not higher in patients with positive BAC<sup>3</sup>. Some studies have  
14 found that serum ethanol is independently associated with increased mortality<sup>41,42</sup>.  
15 Furthermore, some studies have proposed alcohol use can have a protective effect in  
16 trauma patients<sup>3,43,44</sup>. In this study, we did not find a protective role for DUI in our  
17 analysis of the association between DUI and AIS. These findings indicated that BAC  
18 limit, consistent with deterrence theory, can reduce alcohol-impaired driving<sup>45,46</sup>, but  
19 may be not enough to result in a significant reduction in mortality of those trauma  
20 patients. This may indicate that other preventative policies, such as beer taxes,  
21 minimum legal drinking ages, and administrative license revocation, should be  
22 considered<sup>47</sup>.  
23  
24  
25  
26  
27  
28  
29  
30  
31  
32  
33  
34  
35  
36  
37  
38  
39  
40  
41

42 There are some limitations to our study. First, the analysis was based on data  
43 from the trauma registry system of a level I regional trauma center in southern  
44 Taiwan. These results may not be externally valid. Second, there were differences in  
45 the baseline characteristics of patients admitted after traffic accident before and after  
46 sanction change. The differences in baseline characteristics may have confounded  
47 results and observed differences may have implied the effect of sanction change.  
48 Third, the combined use of psychoactive medication and alcohol may increase the risk  
49  
50  
51  
52  
53  
54  
55  
56  
57  
58  
59  
60

1  
2  
3 of having an accident<sup>48,49</sup>. This confounder was not controlled in our study, although  
4 this bias is random. Fourth, patients seeking medical care due to traffic accident did  
5 not routinely receive a blood alcohol test unless they showed symptoms of being  
6 alcohol-impaired. This may underestimate the effect of DUI in our analysis. Fifth, our  
7 registry system is not able to report exact time elapsed from injury to an alcohol test.  
8 However, the mean transport time for the patients transported by emergency medical  
9 service to the hospital was  $18.3 \pm 7.9$  min according to our data and about 12 min  
10 according to Taiwan government data from January 2009 to June 2009. Thus, the bias  
11 may be minimal. Finally, our registry system did not exclude the repeated DUI  
12 patients. Although these drivers may be a small group in our study subjects, they may  
13 confound our statistical results.  
14  
15  
16  
17  
18  
19  
20  
21  
22  
23  
24  
25  
26  
27  
28

## 29 **CONCLUSION**

30  
31 This study revealed that lowering the legal limit for BAC to 30 mg/dL  
32 significantly reduced DUI events. Airbag use in car accidents and helmet use in  
33 motorcycle accidents after sanction change was less in DUI patients than in non-DUI  
34 patients with significant negative correlation. Sanction change failed to result in a  
35 significant reduction in mortality in these trauma patients.  
36  
37  
38  
39  
40  
41  
42  
43

## 44 **ACKNOWLEDGEMENTS**

45  
46 We thank the Biostatistics Center at the Kaohsiung Chang Gung Memorial Hospital  
47 for their help with the statistical analysis.  
48  
49  
50

## 51 **FUNDING**

52  
53 This research was supported by a grant from Chang Gung Memorial Hospital  
54  
55  
56



1  
2  
3 CGRPG8F0011.  
4  
5  
6

7 **AUTHOR CONTRIBUTIONS**

8  
9 Y.-C.T. wrote the manuscript, J.-F.H. assisted with the study design, S.C.H. K. was  
10 involved in the literature review, C.-S.R. was responsible for the integrity of  
11 registered data, P.-C.C performed the statistical analyses and edited the tables,  
12  
13 H.-Y.H. proofread the manuscript, and C.-H.H. designed the study and contributed to  
14 the data analysis and interpretation. All authors read and approved the final  
15 manuscript.  
16  
17  
18  
19  
20  
21  
22  
23

24 **CONFLICTS OF INTEREST**

25  
26 The authors report no conflicts of interest in this work  
27  
28  
29

30  
31 **DATA SHARING**

32  
33 No additional data are available.  
34  
35  
36  
37  
38  
39  
40  
41  
42  
43  
44  
45  
46  
47  
48  
49  
50  
51  
52  
53  
54  
55  
56  
57  
58  
59  
60

## REFERENCES

1. World Health Organization. Global status report on road safety. 2015.
2. World Health Organization. World report on road traffic injury prevention. 2004.
3. Hsieh CH, Su LT, Wang YC, Fu CY, Lo HC, Lin CH. Does alcohol intoxication protect patients from severe injury and reduce hospital mortality? The association of alcohol consumption with the severity of injury and survival in trauma patients. *The American surgeon*. 2013;79(12):1289-1294.
4. Lee MH, Mello MJ, Reinert S. Emergency department charges for evaluating minimally injured alcohol-impaired drivers. *Ann Emerg Med*. 2009;54(4):593-599.
5. Martin TL, Solbeck PA, Mayers DJ, Langille RM, Buczek Y, Pelletier MR. A review of alcohol-impaired driving: the role of blood alcohol concentration and complexity of the driving task. *J Forensic Sci*. 2013;58(5):1238-1250.
6. O'Keeffe T, Rhee P, Shafi S, Friese RS, Gentilello LM. Alcohol use increases diagnostic testing, procedures, charges, and the risk of hospital admission: a population-based study of injured patients in the emergency department. *Am J Surg*. 2013;206(1):16-22.
7. Blomberg RD, Peck RC, Moskowitz H, Burns M, Fiorentino D. The Long Beach/Fort Lauderdale relative risk study. *J Safety Res*. 2009;40(4):285-292.
8. Fell JC, Voas RB. The effectiveness of a 0.05 blood alcohol concentration (BAC) limit for driving in the United States. *Addiction*. 2014;109(6):869-874.
9. Taylor B, Irving HM, Kanteres F, et al. The more you drink, the harder you fall: a systematic review and meta-analysis of how acute alcohol consumption

- 1  
2  
3 and injury or collision risk increase together. *Drug Alcohol Depend.*  
4  
5 2010;110(1-2):108-116.  
6  
7 10. Taylor B, Rehm J. The relationship between alcohol consumption and fatal  
8  
9 motor vehicle injury: high risk at low alcohol levels. *Alcohol Clin Exp Res.*  
10  
11 2012;36(10):1827-1834.  
12  
13 11. Thomas F. Babor. Alcohol: no ordinary commodity--a summary of the second  
14  
15 edition. *Addiction.* 2010;105(5):769-779.  
16  
17 12. Ministry of Interior ROCM, . Statistics of Police Administration. 2018.  
18  
19 13. Chan YS, Chen CS, Huang L, Peng YI. Sanction changes and drunk-driving  
20  
21 injuries/deaths in Taiwan. *Accid Anal Prev.* 2017;107:102-109.  
22  
23 14. Hsieh CH, Hsu SY, Hsieh HY, Chen YC. Differences between the sexes in  
24  
25 motorcycle-related injuries and fatalities at a Taiwanese level I trauma center.  
26  
27 *Biomed J.* 2017;40(2):113-120.  
28  
29 15. Hsieh CH, Liu HT, Hsu SY, Hsieh HY, Chen YC. Motorcycle-related  
30  
31 hospitalizations of the elderly. *Biomed J.* 2017;40(2):121-128.  
32  
33 16. Kuo SCH, Kuo PJ, Chen YC, Chien PC, Hsieh HY, Hsieh CH. Comparison of  
34  
35 the new Exponential Injury Severity Score with the Injury Severity Score and  
36  
37 the New Injury Severity Score in trauma patients: A cross-sectional study.  
38  
39 *PLoS One.* 2017;12(11):e0187871.  
40  
41 17. Maxwell JC, Freeman J. Gender differences in DUI offenders in treatment in  
42  
43 Texas. *Traffic injury prevention.* 2007;8(4):353-360.  
44  
45 18. Tang CE, Liu HT, Kuo PJ, et al. Impact of Sexual Dimorphism on Trauma  
46  
47 Patterns and Clinical Outcomes of Patients with a High-Risk Score of the  
48  
49 Osteoporosis Self-Assessment Tool for Asians: A Propensity Score-Matched  
50  
51 Analysis. *Int J Environ Res Public Health.* 2018;15(3).  
52  
53  
54  
55  
56  
57  
58  
59  
60

19. Apidechkul T, Laingoen O, Suwannaporn S, Tamornpark R. Factors Influencing Motorcycle Accidents among Hill Tribe Youths in Chiang Rai, Thailand. *Thailand. Journal of Health Research*. 2017;31(6):473-480.
20. Mbanjumucyo G, George N, Kearney A, et al. Epidemiology of injuries and outcomes among trauma patients receiving prehospital care at a tertiary teaching hospital in Kigali, Rwanda. *African Journal of Emergency Medicine*. 2016;6(4):191-197.
21. Eagon PK. Alcoholic liver injury: Influence of gender and hormones. *World Journal of Gastroenterology*. 2010;16(11):1377.
22. Hommer DW. Male and female sensitivity to alcohol-induced brain damage. *Alcohol research & health : the journal of the National Institute on Alcohol Abuse and Alcoholism*. 2003;27(2):181-185.
23. Bradley KA, Badrinath S, Bush K, Boyd-Wickizer J, Anawalt B. Medical risks for women who drink alcohol. *Journal of general internal medicine*. 1998;13(9):627-639.
24. Nolen-Hoeksema S. Gender differences in risk factors and consequences for alcohol use and problems. *Clin Psychol Rev*. 2004;24(8):981-1010.
25. Nolen-Hoeksema S, Hilt L. Possible contributors to the gender differences in alcohol use and problems. *J Gen Psychol*. 2006;133(4):357-374.
26. Horswill MS, Coster ME. The effect of vehicle characteristics on drivers' risk-taking behaviour. *Ergonomics*. 2002;45(2):85-104.
27. Buckley L, Bingham CR, Flannagan CA, Carter PM, Almani F, Cicchino JB. Observation of motorcycle helmet use rates in Michigan after partial repeal of the universal motorcycle helmet law. *Accid Anal Prev*. 2016;95(Pt A):178-186.
28. Kuo SCH, Kuo PJ, Rau CS, Chen YC, Hsieh HY, Hsieh CH. The protective

- 1  
2  
3 effect of helmet use in motorcycle and bicycle accidents: a propensity  
4 score-matched study based on a trauma registry system. *BMC Public Health*.  
5 2017;17(1):639.  
6  
7  
8  
9 29. Lin KC, Peng SH, Kuo PJ, Chen YC, Rau CS, Hsieh CH. Patterns Associated  
10 with Adult Mandibular Fractures in Southern Taiwan-A Cross-Sectional  
11 Retrospective Study. *Int J Environ Res Public Health*. 2017;14(7).  
12  
13  
14  
15 30. Heydari ST, Vossoughi M, Akbarzadeh A, et al. Prevalence and risk factors of  
16 alcohol and substance abuse among motorcycle drivers in Fars province, Iran.  
17 *Chinese Journal of Traumatology*. 2016;19(2):79-84.  
18  
19  
20  
21 31. Maistros A, Schneider WHt, Savolainen PT. A comparison of contributing  
22 factors between alcohol related single vehicle motorcycle and car crashes. *J*  
23 *Safety Res*. 2014;49:129-135.  
24  
25  
26  
27 32. Hingson R, Fau. HT, Winter M. Effects of Maine's 0.05% legal blood alcohol  
28 level for drivers with DWI convictions. 1998(0033-3549 (Print)).  
29  
30  
31  
32 33. Homel R. Drink-driving law enforcement and the legal blood alcohol limit in  
33 New South Wales. 1994(0001-4575 (Print)).  
34  
35  
36  
37 34. Blais E, Bellavance F, Marcil A, Carnis L. Effects of introducing an  
38 administrative .05% blood alcohol concentration limit on law enforcement  
39 patterns and alcohol-related collisions in Canada. *Accid Anal Prev*.  
40 2015;82:101-111.  
41  
42  
43  
44 35. Fell JC, Scherer M. Estimation of the Potential Effectiveness of Lowering the  
45 Blood Alcohol Concentration (BAC) Limit for Driving from 0.08 to 0.05  
46 Grams per Deciliter in the United States. *Alcohol Clin Exp Res*.  
47 2017;41(12):2128-2139.  
48  
49  
50  
51 36. Chen H, Chen Q, Chen L, Zhang G. Analysis of risk factors affecting driver  
52  
53  
54  
55  
56

- 1  
2  
3 injury and crash injury with drivers under the influence of alcohol (DUI) and  
4 non-DUI. *Traffic injury prevention*. 2016;17(8):796-802.  
5  
6  
7 37. Velmurugan S, Padma S, Madhu E, Anuradha S, Gangopadhyay S. A study of  
8 factors influencing the severity of road crashes involving drunk drivers and  
9 non drunk drivers. *Research in Transportation Economics*. 2013;38(1):78-83.  
10  
11  
12 38. Li YC, Sze NN, Wong SC. Spatial-temporal analysis of drink-driving patterns  
13 in Hong Kong. *Accid Anal Prev*. 2013;59:415-424.  
14  
15  
16 39. Damsere-Derry J, Palk G, King M. Prevalence of alcohol-impaired driving  
17 and riding in northern Ghana. *Traffic injury prevention*. 2016;17(3):226-232.  
18  
19  
20 40. Impinen A, Makela P, Karjalainen K, et al. High mortality among people  
21 suspected of drunk-driving. An 18-year register-based follow-up. *Drug*  
22 *Alcohol Depend*. 2010;110(1-2):80-84.  
23  
24  
25 41. Pories SE, Gamelli RL, Vacek P, Goodwin G, Shinozaki T, Harris F.  
26 Intoxication and injury. *J. Trauma*. 1992;32(1):60-64.  
27  
28  
29 42. Luna GK, Maier RV, Sowder L, Copass MK, Oreskovich MR. The influence  
30 of ethanol intoxication on outcome of injured motorcyclists. *The Journal of*  
31 *trauma*. 1984;24(8):695-700.  
32  
33  
34 43. Cherry RA, Nichols PA, Snavely TM, Camera LJ, Mauger DT. Resource  
35 utilization and outcomes of intoxicated drivers. *Journal of trauma*  
36 *management & outcomes*. 2010;4:9.  
37  
38  
39 44. Plurad D, Demetriades D, Gruzinski G, et al. Motor vehicle crashes: the  
40 association of alcohol consumption with the type and severity of injuries and  
41 outcomes. *J. Emerg. Med*. 2010;38(1):12-17.  
42  
43  
44 45. Bachmann M, Dixon AL. DWI Sentencing in the United States: Toward  
45 Promising Punishment Alternatives in Texas. *International Journal of*  
46  
47  
48  
49  
50  
51  
52  
53  
54  
55  
56  
57  
58  
59  
60

- 1  
2  
3 *Criminal Justice Sciences* 2014;9(2):181.  
4  
5 46. Yao J, Johnson MB, Beck KH. Predicting DUI decisions in different legal  
6 environments: investigating deterrence with a conjoint experiment. *Traffic*  
7 *injury prevention*. 2014;15(3):213-221.  
8  
9  
10  
11 47. Chang K, Wu CC, Ying YH. The effectiveness of alcohol control policies on  
12 alcohol-related traffic fatalities in the United States. *Accid Anal Prev*.  
13 2012;45:406-415.  
14  
15  
16  
17 48. Bogstrand ST, Gjerde H, Normann PT, Rossow I, Ekeberg O. Alcohol,  
18 psychoactive substances and non-fatal road traffic accidents--a case-control  
19 study. *BMC public health*. 2012;12:734.  
20  
21  
22  
23  
24 49. Ricci G, Majori S, Mantovani W, Zappaterra A, Rocca G, Buonocore F.  
25 Prevalence of alcohol and drugs in urine of patients involved in road  
26 accidents. *Journal of preventive medicine and hygiene*. 2008;49(2):89-95.  
27  
28  
29  
30  
31  
32  
33  
34  
35  
36  
37  
38  
39  
40  
41  
42  
43  
44  
45  
46  
47  
48  
49  
50  
51  
52  
53  
54  
55  
56  
57  
58  
59  
60

Table 1. Demographic features and DUI-related variables before and after sanction

|                      | Before sanction | After sanction | <i>p</i>            |
|----------------------|-----------------|----------------|---------------------|
| Gender, n (%)        |                 |                | 0.028               |
| Male                 | 2,041 (60.12%)  | 2,334 (57.6%)  |                     |
| Female               | 1,354 (39.88%)  | 1,718 (42.4%)  |                     |
| Age (years)          | 42.77 (18.34)   | 44.45 (18.97)  | <0.001 <sup>a</sup> |
| DUI, n (%)           |                 |                | <0.001              |
| Yes                  | 373 (10.99%)    | 269 (6.64%)    |                     |
| No                   | 3,022 (89.01%)  | 3,783 (93.36%) |                     |
| BAC (mg/dL)          | 21.19 (62.49)   | 12.31 (47.12)  | <0.001 <sup>a</sup> |
| Car, n (%)           |                 |                | 0.057               |
| Airbag               | 73 (70.19%)     | 61 (57.55%)    |                     |
| No airbag            | 31 (29.81%)     | 45 (42.45%)    |                     |
| Motorcycle, n (%)    |                 |                | <0.001              |
| Helmet               | 2,876 (87.39%)  | 3,560 (90.22%) |                     |
| No Helmet            | 415 (12.61%)    | 386 (9.78%)    |                     |
| ISS                  | 9 (9)           | 9 (9)          | 0.041 <sup>a</sup>  |
| Hospital stay (days) | 6 (7)           | 7 (8)          | 0.198 <sup>a</sup>  |
| Mortality, n (%)     |                 |                | 0.125               |
| Alive                | 3,357 (98.88%)  | 3,990 (98.47%) |                     |
| Death                | 38 (1.12%)      | 62 (1.53%)     |                     |
| Seasons, n (%)       |                 |                | <0.001              |
| Spring               | 605 (17.82%)    | 994 (24.53%)   |                     |
| Summer               | 874 (25.74%)    | 1,008 (24.88%) |                     |
| Autumn               | 970 (28.57%)    | 962 (23.74%)   |                     |
| Winter               | 946 (27.86%)    | 1,088 (26.85%) |                     |



|    |                 |                |                |        |
|----|-----------------|----------------|----------------|--------|
| 1  | Time, n (%)     |                |                | <0.001 |
| 2  | 6AM - 2PM       | 1,351 (39.79%) | 1,822 (44.97%) |        |
| 3  |                 |                |                |        |
| 4  | 2PM - 10PM      | 1,436 (42.30%) | 1,608 (39.68%) |        |
| 5  |                 |                |                |        |
| 6  | 10PM - 6AM      | 608 (17.91%)   | 622 (15.35%)   |        |
| 7  |                 |                |                |        |
| 8  | Weekdays, n (%) |                |                | 0.012  |
| 9  |                 |                |                |        |
| 10 | Monday          | 487 (14.34%)   | 639 (15.77%)   |        |
| 11 |                 |                |                |        |
| 12 | Tuesday         | 553 (16.29%)   | 558 (13.77%)   |        |
| 13 |                 |                |                |        |
| 14 | Wednesday       | 440 (12.96%)   | 587 (14.49%)   |        |
| 15 |                 |                |                |        |
| 16 | Thursday        | 494 (14.55%)   | 590 (14.56%)   |        |
| 17 |                 |                |                |        |
| 18 | Friday          | 480 (14.14%)   | 613 (15.13%)   |        |
| 19 |                 |                |                |        |
| 20 | Saturday        | 504 (14.85%)   | 582 (14.36%)   |        |
| 21 |                 |                |                |        |
| 22 | Sunday          | 437 (12.87%)   | 483 (11.92%)   |        |
| 23 |                 |                |                |        |
| 24 |                 |                |                |        |
| 25 |                 |                |                |        |

---

<sup>a</sup> Mann-Whitney test

Table 2. Demographic features and clinical outcome in DUI and non-DUI patients

|                      | DUI           | Non-DUI        | <i>p</i>            |
|----------------------|---------------|----------------|---------------------|
| Gender, n (%)        |               |                | <0.001              |
| Male                 | 568 (88.47%)  | 3,807 (55.94%) |                     |
| Female               | 74 (11.53%)   | 2,998 (44.06%) |                     |
| Age (years)          | 39.64 (12.76) | 44.07 (19.13)  | <0.001 <sup>a</sup> |
| Car, n (%)           |               |                | 0.020               |
| Airbag               | 25 (50.00%)   | 109 (68.13%)   |                     |
| No airbag            | 25 (50.00%)   | 51 (31.88%)    |                     |
| Motorcycle, n (%)    |               |                | <0.001              |
| Helmet               | 433 (73.14%)  | 6,003 (90.34%) |                     |
| No Helmet            | 159 (26.86%)  | 642 (9.66%)    |                     |
| ISS                  | 13 (14)       | 9 (7)          | <0.001 <sup>a</sup> |
| Hospital stay (days) | 8 (11)        | 6 (7)          | <0.001 <sup>a</sup> |
| Mortality, n (%)     |               |                | <0.001              |
| Alive                | 612 (95.33%)  | 6,735 (98.97%) |                     |
| Death                | 30 (4.67%)    | 70 (1.03%)     |                     |
| Seasons, n (%)       |               |                | 0.522               |
| Spring               | 135 (21.03%)  | 1,464 (21.51%) |                     |
| Summer               | 153 (23.83%)  | 1,729 (25.41%) |                     |
| Autumn               | 163 (25.39%)  | 1,769 (26.00%) |                     |
| Winter               | 191 (29.75%)  | 1,843 (27.08%) |                     |
| Time, n (%)          |               |                | <0.001              |
| 6AM - 2PM            | 70 (10.90%)   | 3,103 (45.60%) |                     |
| 2PM - 10PM           | 249 (38.79%)  | 2,795 (41.07%) |                     |
| 10PM - 6AM           | 323 (50.31%)  | 907 (13.33%)   |                     |

Weekdays, n (%)

&lt;0.001

|    |           |              |                |
|----|-----------|--------------|----------------|
| 1  |           |              |                |
| 2  | Monday    | 81 (12.62%)  | 1,045 (15.36%) |
| 3  |           |              |                |
| 4  | Tuesday   | 72 (11.21%)  | 1,039 (15.27%) |
| 5  |           |              |                |
| 6  | Wednesday | 85 (13.24%)  | 942 (13.84%)   |
| 7  |           |              |                |
| 8  | Thursday  | 79 (12.31%)  | 1,005 (14.77%) |
| 9  |           |              |                |
| 10 | Friday    | 81 (12.62%)  | 1,012 (14.87%) |
| 11 |           |              |                |
| 12 | Saturday  | 120 (18.69%) | 966 (14.20%)   |
| 13 |           |              |                |
| 14 | Sunday    | 124 (19.31%) | 796 (11.70%)   |
| 15 |           |              |                |
| 16 |           |              |                |

---

<sup>a</sup> Mann-Whitney test

Table 3. Homogeneity analysis of factors related to DUI before and after sanction

|                         | Before sanction |               |                    | After sanction |               |                        | Crude OR<br>(95% CI) | <i>p</i> |
|-------------------------|-----------------|---------------|--------------------|----------------|---------------|------------------------|----------------------|----------|
|                         | DUI             | Non-DUI       | OR (95% CI)        | DUI            | Non-DUI       | OR (95% CI)            |                      |          |
| <b>Gender, n (%)</b>    |                 |               |                    |                |               |                        |                      |          |
| Male                    | 331 (9.75%)     | 1710 (50.37%) | 6.05 (4.35-8.40)   | 237 (5.85%)    | 2097 (51.75%) | 5.96 (4.09-8.66)       | 6.01 (4.69-7.69)     | 0.952    |
| Female                  | 42 (1.24%)      | 1312 (38.65%) |                    | 32 (0.79%)     | 1686 (41.61%) |                        |                      |          |
| <b>Mortality, n (%)</b> |                 |               |                    |                |               |                        |                      |          |
| Alive                   | 360 (10.60%)    | 2997 (88.28%) | 4.33 (2.20-8.54)   | 252 (6.22%)    | 3738 (92.25%) | 5.60 (3.16-9.93)       | 4.98 (3.21-7.73)     | 0.568    |
| Death                   | 13 (0.38)       | 25 (0.74%)    |                    | 17 (0.42%)     | 45 (1.11%)    |                        |                      |          |
| <b>Time, n (%)</b>      |                 |               |                    |                |               |                        |                      |          |
| 6AM – 2PM               | 46 (12.33%)     | 1305 (43.18%) | 1                  | 24 (8.92%)     | 1798 (47.53%) | 1                      |                      | <0.001   |
| 2PM – 10PM              | 139 (37.27%)    | 1297 (42.92%) | 3.04 (2.16-4.28)   | 110 (40.89%)   | 1498 (39.60%) | 5.50 (3.52-8.60)       |                      |          |
| 10PM – 6AM              | 188 (50.40%)    | 420 (13.90%)  | 12.70 (9.03-17.85) | 135 (50.19%)   | 487 (12.87%)  | 20.76<br>(13.30-32.41) |                      |          |
| <b>Car, n (%)</b>       |                 |               |                    |                |               |                        |                      |          |
| Airbag                  | 19 (59.38%)     | 54 (75.00%)   | 0.49 (0.20-1.18)   | 6 (33.33%)     | 55 (62.50%)   | 0.30 (0.10-0.88)       |                      | 0.007    |
| No airbag               | 13 (40.63%)     | 18 (25.00%)   |                    | 12 (66.67%)    | 33 (37.50%)   |                        |                      |          |

|    |                  |              |               |                  |              |               |                  |                  |
|----|------------------|--------------|---------------|------------------|--------------|---------------|------------------|------------------|
| 1  |                  |              |               |                  |              |               |                  |                  |
| 2  |                  |              |               |                  |              |               |                  |                  |
| 3  |                  |              |               |                  |              |               |                  |                  |
| 4  | Saturday         | 72 (19.30%)  | 432 (14.30%)  | 0.83 (0.58-1.18) | 48 (17.84%)  | 534 (14.12%)  | 0.76 (0.50-1.15) |                  |
| 5  |                  |              |               |                  |              |               |                  |                  |
| 6  | Motorcycle n (%) |              |               |                  |              |               |                  | <0.001           |
| 7  |                  |              |               |                  |              |               |                  |                  |
| 8  | Helmet           | 261 (76.54%) | 2615 (88.64%) | 0.42 (0.32-0.55) | 172 (68.53%) | 3388 (91.69%) | 0.20 (0.15-0.26) |                  |
| 9  |                  |              |               |                  |              |               |                  |                  |
| 10 | No Helmet        | 80 (23.46%)  | 335 (11.36%)  |                  | 79 (31.47%)  | 307 (8.31%)   |                  |                  |
| 11 |                  |              |               |                  |              |               |                  |                  |
| 12 | Seasons, n (%)   |              |               |                  |              |               |                  | 0.456            |
| 13 |                  |              |               |                  |              |               |                  |                  |
| 14 | Spring           | 63 (16.89%)  | 542 (17.94%)  | 1                | 72 (26.77%)  | 922 (24.37%)  | 1                |                  |
| 15 |                  |              |               |                  |              |               |                  |                  |
| 16 | Summer           | 98 (26.27%)  | 776 (25.68%)  | 1.09 (0.78-1.52) | 55 (20.45%)  | 953 (25.19%)  | 0.74 (0.51-1.06) | 0.96 (0.75-1.22) |
| 17 |                  |              |               |                  |              |               |                  |                  |
| 18 | Autumn           | 94 (25.20%)  | 876 (28.99%)  | 0.92 (0.66-1.29) | 69 (25.65%)  | 893 (23.61%)  | 0.99 (0.70-1.39) | 1.00 (0.79-1.27) |
| 19 |                  |              |               |                  |              |               |                  |                  |
| 20 | Winter           | 118 (31.64%) | 828 (27.40%)  | 1.23 (0.89-1.70) | 73 (27.14%)  | 1015 (26.83%) | 0.92 (0.66-1.29) | 1.12 (0.89-1.42) |
| 21 |                  |              |               |                  |              |               |                  |                  |
| 22 |                  |              |               |                  |              |               |                  |                  |
| 23 | Weekdays, n (%)  |              |               |                  |              |               |                  | <0.001           |
| 24 |                  |              |               |                  |              |               |                  |                  |
| 25 | Sunday           | 73 (19.57%)  | 364 (12.05%)  | 1                | 51 (18.96%)  | 432 (11.42%)  | 1                |                  |
| 26 |                  |              |               |                  |              |               |                  |                  |
| 27 | Monday           | 40 (10.72%)  | 447 (14.79%)  | 0.45 (0.30-0.67) | 41 (15.24%)  | 598 (15.81%)  | 0.58 (0.38-0.89) |                  |
| 28 |                  |              |               |                  |              |               |                  |                  |
| 29 | Tuesday          | 45 (12.06%)  | 508 (16.81%)  | 0.44 (0.30-0.66) | 27 (10.04%)  | 531 (14.04%)  | 0.43 (0.27-0.70) |                  |
| 30 |                  |              |               |                  |              |               |                  |                  |
| 31 | Wednesday        | 47 (12.60%)  | 393 (13.00%)  | 0.60 (0.40-0.88) | 38 (14.13%)  | 549 (14.51)   | 0.57 (0.38-0.91) |                  |
| 32 |                  |              |               |                  |              |               |                  |                  |
| 33 | Thursday         | 50 (13.40%)  | 444 (14.69%)  | 0.56 (0.38-0.83) | 29 (10.78%)  | 561 (14.83%)  | 0.44 (0.27-0.70) |                  |
| 34 |                  |              |               |                  |              |               |                  |                  |
| 35 | Friday           | 46 (12.33%)  | 434 (14.36%)  | 0.53 (0.36-0.78) | 35 (13.01%)  | 578 (15.28%)  | 0.51 (0.33-0.80) |                  |
| 36 |                  |              |               |                  |              |               |                  |                  |
| 37 |                  |              |               |                  |              |               |                  |                  |

<sup>a</sup> Breslow-Day statistic

Table 4. The distribution of Abbreviated Injury Scale (AIS) score in DUI/non-DUI patients

|           | DUI          | Non-DUI       | OR (95% CI)       | p        |
|-----------|--------------|---------------|-------------------|----------|
| Head/Neck |              |               |                   | < 0.0001 |
| 0         | 269 (41.90%) | 4799 (70.52%) | 1                 |          |
| 1         | 94 (14.64%)  | 638 (9.38%)   | 2.63 (2.05-3.37)  |          |
| 2         | 22 (3.43%)   | 105 (1.54%)   | 3.74 (2.32-6.02)  |          |
| 3         | 81 (12.62%)  | 506 (7.44%)   | 2.86 (2.19-3.72)  |          |
| 4         | 131 (20.40%) | 597 (8.77%)   | 3.92 (3.12-4.91)  |          |
| 5-6       | 45 (7.01%)   | 1160 (2.35%)  | 0.69 (0.50-0.96)  |          |
| Face      |              |               |                   | < 0.0001 |
| 0         | 361 (56.23%) | 5342 (78.50%) | 1                 |          |
| 1         | 64 (9.97%)   | 493 (7.24%)   | 1.921 (1.45-2.55) |          |
| 2         | 215 (33.49%) | 949 (13.95%)  | 3.353 (2.79-4.02) |          |
| 3         | 2 (0.31%)    | 21 (0.31%)    | 1.409 (0.33-6.03) |          |
| Thorax    |              |               |                   | < 0.0001 |
| 0         | 488 (76.01%) | 5640 (82.88%) | 1                 |          |
| 1         | 31 (4.83%)   | 220 (3.23%)   | 1.63 (1.11-2.40)  |          |
| 2         | 27 (4.21%)   | 306 (4.50%)   | 1.02 (0.681-1.53) |          |
| 3         | 57 (8.88%)   | 437 (6.42%)   | 1.51 (1.13-2.02)  |          |
| 4         | 37 (5.76%)   | 196 (2.88%)   | 2.18 (1.52-3.14)  |          |
| 5-6       | 2 (0.32%)    | 6 (0.08%)     | 3.85 (0.78-19.14) |          |
| Abdomen   |              |               |                   | < 0.0001 |
| 0         | 552 (85.98%) | 6319 (92.86%) | 1                 |          |
| 1         | 7 (1.09%)    | 38 (0.56%)    | 2.109 (0.94-4.74) |          |
| 2         | 42 (6.54%)   | 222 (3.26%)   | 2.166 (1.57-3.05) |          |

|    |             |              |               |                   |          |
|----|-------------|--------------|---------------|-------------------|----------|
| 1  | 3           | 23 (3.58%)   | 141 (2.07%)   | 1.867 (1.19-2.93) |          |
| 2  | 4           | 13 (2.02%)   | 69 (1.01%)    | 2.157 (1.19-3.93) |          |
| 3  |             |              |               |                   |          |
| 4  | 5           | 5 (0.78%)    | 16 (0.24%)    | 3.583 (1.31-9.81) |          |
| 5  |             |              |               |                   |          |
| 6  | Extremities |              |               |                   | < 0.0001 |
| 7  |             |              |               |                   |          |
| 8  | 0           | 261 (40.65%) | 1839 (29.02%) | 1                 |          |
| 9  |             |              |               |                   |          |
| 10 | 1           | 63 (9.81%)   | 435 (6.39%)   | 1.020 (0.76-1.37) |          |
| 11 |             |              |               |                   |          |
| 12 | 2           | 185 (28.82%) | 2973 (43.69%) | 0.438 (0.36-0.53) |          |
| 13 |             |              |               |                   |          |
| 14 | 3-5         | 133 (20.72%) | 1558 (22.89%) | 0.61 (0.48-0.75)  |          |
| 15 |             |              |               |                   |          |
| 16 | External    |              |               |                   | 0.195    |
| 17 |             |              |               |                   |          |
| 18 | 0           | 536 (83.49%) | 5799 (85.22%) | 1                 |          |
| 19 |             |              |               |                   |          |
| 20 | 1           | 102 (15.89%) | 981 (14.42%)  | 1.125 (0.90-1.41) |          |
| 21 |             |              |               |                   |          |
| 22 | 2           | 4 (0.62%)    | 25 (0.37%)    | 1.731 (0.60-4.99) |          |
| 23 |             |              |               |                   |          |
| 24 |             |              |               |                   |          |
| 25 |             |              |               |                   |          |

### Figure legend

Figure 1. The monthly DUI patient number before (July 2009 to December 2012) and after (July 2013 to December 2016) sanction change with multivariate regression line

Figure 2. DUI event density over the 71 district areas of southern Taiwan (A. before sanction change; B. after sanction change)

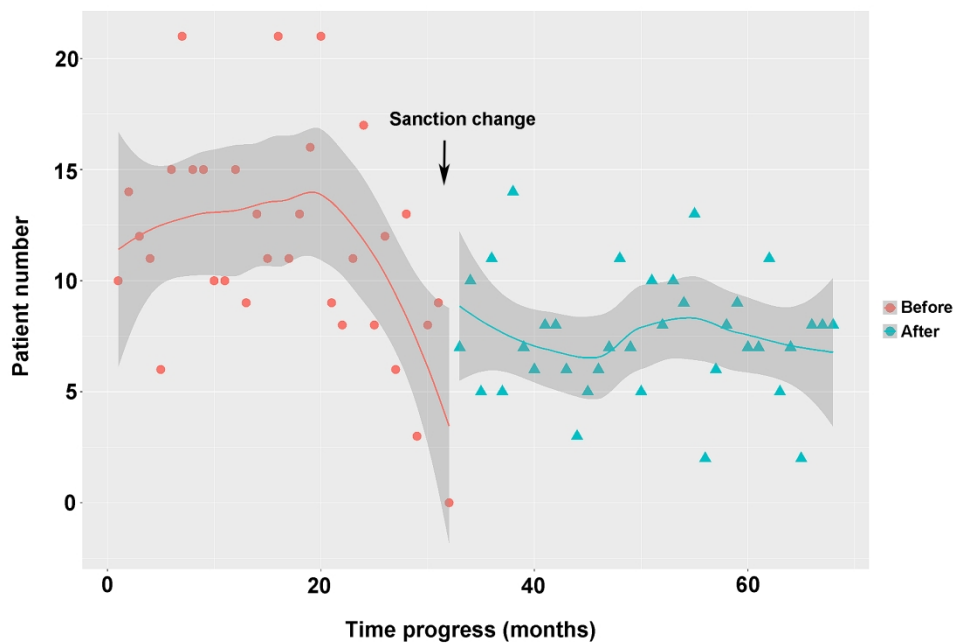

The monthly DUI patient number before (July 2009 to December 2012) and after (July 2013 to December 2016) sanction change with multivariate regression line

224x153mm (300 x 300 DPI)



1  
2  
3  
4  
5  
6  
7  
8  
9  
10  
11  
12  
13  
14  
15  
16  
17  
18  
19  
20  
21  
22  
23  
24  
25  
26  
27  
28  
29  
30  
31  
32  
33  
34  
35  
36  
37  
38  
39  
40  
41  
42  
43  
44  
45  
46  
47  
48  
49  
50  
51  
52  
53  
54  
55  
56  
57  
58  
59  
60

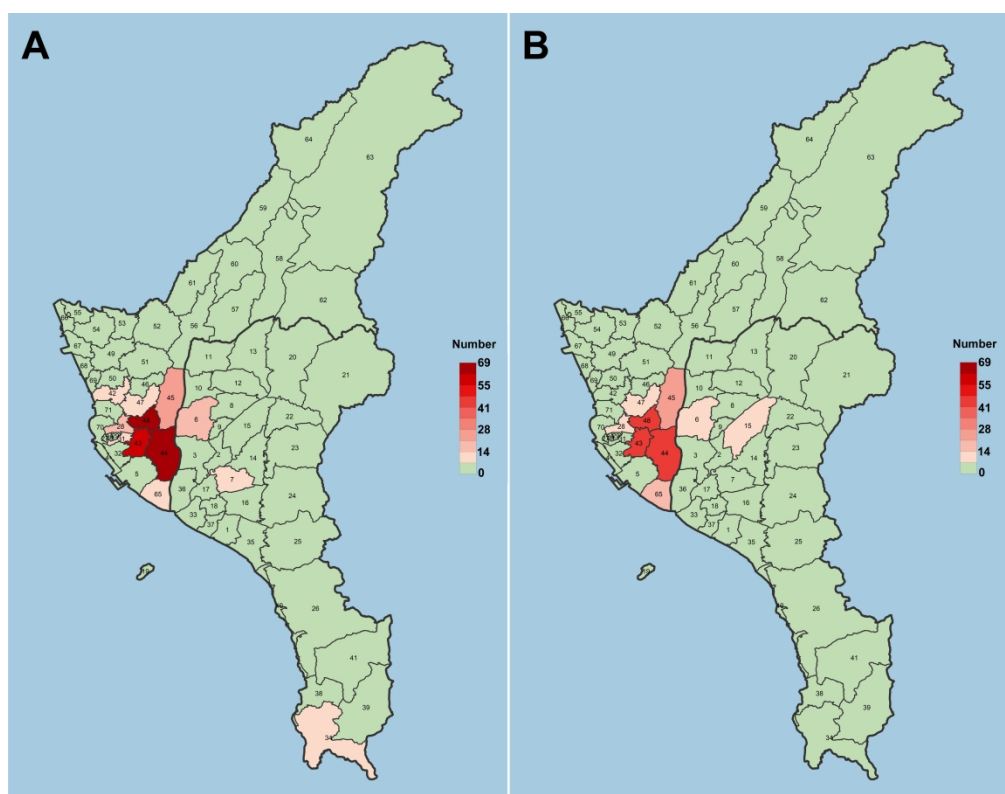

DUI event density over the 71 district areas of southern Taiwan (A. before sanction change; B. after sanction change)

350x273mm (300 x 300 DPI)

STROBE Statement—Checklist of items that should be included in reports of *cross-sectional studies*

|                              | Item No | Recommendation                                                                                                                                                                                               | Page No |
|------------------------------|---------|--------------------------------------------------------------------------------------------------------------------------------------------------------------------------------------------------------------|---------|
| <b>Title and abstract</b>    | 1       | (a) Indicate the study's design with a commonly used term in the title or the abstract                                                                                                                       | 2       |
|                              |         | (b) Provide in the abstract an informative and balanced summary of what was done and what was found                                                                                                          | 2       |
| <b>Introduction</b>          |         |                                                                                                                                                                                                              |         |
| Background/rationale         | 2       | Explain the scientific background and rationale for the investigation being reported                                                                                                                         | 4       |
| Objectives                   | 3       | State specific objectives, including any prespecified hypotheses                                                                                                                                             | 4       |
| <b>Methods</b>               |         |                                                                                                                                                                                                              |         |
| Study design                 | 4       | Present key elements of study design early in the paper                                                                                                                                                      | 6       |
| Setting                      | 5       | Describe the setting, locations, and relevant dates, including periods of recruitment, exposure, follow-up, and data collection                                                                              | 6       |
| Participants                 | 6       | (a) Give the eligibility criteria, and the sources and methods of selection of participants                                                                                                                  | 6       |
| Variables                    | 7       | Clearly define all outcomes, exposures, predictors, potential confounders, and effect modifiers. Give diagnostic criteria, if applicable                                                                     | 7       |
| Data sources/<br>measurement | 8*      | For each variable of interest, give sources of data and details of methods of assessment (measurement). Describe comparability of assessment methods if there is more than one group                         | 7       |
| Bias                         | 9       | Describe any efforts to address potential sources of bias                                                                                                                                                    | -       |
| Study size                   | 10      | Explain how the study size was arrived at                                                                                                                                                                    | 6       |
| Quantitative variables       | 11      | Explain how quantitative variables were handled in the analyses. If applicable, describe which groupings were chosen and why                                                                                 | 6       |
| Statistical methods          | 12      | (a) Describe all statistical methods, including those used to control for confounding                                                                                                                        | 7       |
|                              |         | (b) Describe any methods used to examine subgroups and interactions                                                                                                                                          | 7       |
|                              |         | (c) Explain how missing data were addressed                                                                                                                                                                  | 6       |
|                              |         | (d) If applicable, describe analytical methods taking account of sampling strategy                                                                                                                           | -       |
|                              |         | (e) Describe any sensitivity analyses                                                                                                                                                                        | 6       |
| <b>Results</b>               |         |                                                                                                                                                                                                              |         |
| Participants                 | 13*     | (a) Report numbers of individuals at each stage of study—eg numbers potentially eligible, examined for eligibility, confirmed eligible, included in the study, completing follow-up, and analysed            | 6       |
|                              |         | (b) Give reasons for non-participation at each stage                                                                                                                                                         | -       |
|                              |         | (c) Consider use of a flow diagram                                                                                                                                                                           | -       |
| Descriptive data             | 14*     | (a) Give characteristics of study participants (eg demographic, clinical, social) and information on exposures and potential confounders                                                                     | 8-10    |
|                              |         | (b) Indicate number of participants with missing data for each variable of interest                                                                                                                          | -       |
| Outcome data                 | 15*     | Report numbers of outcome events or summary measures                                                                                                                                                         | 8-10    |
| Main results                 | 16      | (a) Give unadjusted estimates and, if applicable, confounder-adjusted estimates and their precision (eg, 95% confidence interval). Make clear which confounders were adjusted for and why they were included | 8-10    |

|                          |    |                                                                                                                                                                            |       |
|--------------------------|----|----------------------------------------------------------------------------------------------------------------------------------------------------------------------------|-------|
|                          |    | (b) Report category boundaries when continuous variables were categorized                                                                                                  | -     |
|                          |    | (c) If relevant, consider translating estimates of relative risk into absolute risk for a meaningful time period                                                           | -     |
| Other analyses           | 17 | Report other analyses done—eg analyses of subgroups and interactions, and sensitivity analyses                                                                             | -     |
| <b>Discussion</b>        |    |                                                                                                                                                                            |       |
| Key results              | 18 | Summarise key results with reference to study objectives                                                                                                                   | 11    |
| Limitations              | 19 | Discuss limitations of the study, taking into account sources of potential bias or imprecision. Discuss both direction and magnitude of any potential bias                 | 13-14 |
| Interpretation           | 20 | Give a cautious overall interpretation of results considering objectives, limitations, multiplicity of analyses, results from similar studies, and other relevant evidence | 11    |
| Generalisability         | 21 | Discuss the generalisability (external validity) of the study results                                                                                                      | -     |
| <b>Other information</b> |    |                                                                                                                                                                            |       |
| Funding                  | 22 | Give the source of funding and the role of the funders for the present study and, if applicable, for the original study on which the present article is based              | 14    |

\*Give information separately for exposed and unexposed groups.

**Note:** An Explanation and Elaboration article discusses each checklist item and gives methodological background and published examples of transparent reporting. The STROBE checklist is best used in conjunction with this article (freely available on the Web sites of PLoS Medicine at <http://www.plosmedicine.org/>, Annals of Internal Medicine at <http://www.annals.org/>, and Epidemiology at <http://www.epidem.com/>). Information on the STROBE Initiative is available at [www.strobe-statement.org](http://www.strobe-statement.org).

# BMJ Open

## The effect of lowering the legal blood alcohol concentration limit on driving under the influence (DUI) in southern Taiwan – a cross-sectional retrospective analysis

|                                 |                                                                                                                                                                                                                                                                                                                                                                                                                                                                                                                                                                                                                                                                                                                                                                                                                                                                                                                                                                                                                                                                                                                     |
|---------------------------------|---------------------------------------------------------------------------------------------------------------------------------------------------------------------------------------------------------------------------------------------------------------------------------------------------------------------------------------------------------------------------------------------------------------------------------------------------------------------------------------------------------------------------------------------------------------------------------------------------------------------------------------------------------------------------------------------------------------------------------------------------------------------------------------------------------------------------------------------------------------------------------------------------------------------------------------------------------------------------------------------------------------------------------------------------------------------------------------------------------------------|
| Journal:                        | <i>BMJ Open</i>                                                                                                                                                                                                                                                                                                                                                                                                                                                                                                                                                                                                                                                                                                                                                                                                                                                                                                                                                                                                                                                                                                     |
| Manuscript ID                   | bmjopen-2018-026481.R1                                                                                                                                                                                                                                                                                                                                                                                                                                                                                                                                                                                                                                                                                                                                                                                                                                                                                                                                                                                                                                                                                              |
| Article Type:                   | Research                                                                                                                                                                                                                                                                                                                                                                                                                                                                                                                                                                                                                                                                                                                                                                                                                                                                                                                                                                                                                                                                                                            |
| Date Submitted by the Author:   | 23-Nov-2018                                                                                                                                                                                                                                                                                                                                                                                                                                                                                                                                                                                                                                                                                                                                                                                                                                                                                                                                                                                                                                                                                                         |
| Complete List of Authors:       | Tsai, Yu-Chin; Kaohsiung Chang Gung Memorial Hospital and Chang Gung University College of Medicine, Department of Neurosurgery<br>Wu, Shao-Chun; Kaohsiung Chang Gung Memorial Hospital and Chang Gung University College of Medicine, Department of Anesthesiology<br>Huang, Jin-Fu; Kaohsiung Chang Gung Memorial Hospital and Chang Gung University College of Medicine, Department of Neurosurgery<br>Kuo, Spencer C.H.; Kaohsiung Chang Gung Memorial Hospital and Chang Gung University College of Medicine, Department of Plastic Surgery<br>Rau, Cheng-Shyuan; Kaohsiung Chang Gung Memorial Hospital and Chang Gung University College of Medicine, Department of Neurosurgery<br>Chien, Peng-Chen; Kaohsiung Chang Gung Memorial Hospital and Chang Gung University College of Medicine, Department of Plastic Surgery<br>Hsieh, Hsiao-Yun; Kaohsiung Chang Gung Memorial Hospital and Chang Gung University College of Medicine, Department of Plastic Surgery<br>Hsieh, Ching-Hua; Kaohsiung Chang Gung Memorial Hospital and Chang Gung University College of Medicine, Department of Plastic Surgery |
| <b>Primary Subject Heading</b>: | Public health                                                                                                                                                                                                                                                                                                                                                                                                                                                                                                                                                                                                                                                                                                                                                                                                                                                                                                                                                                                                                                                                                                       |
| Secondary Subject Heading:      | Addiction, Epidemiology, Public health                                                                                                                                                                                                                                                                                                                                                                                                                                                                                                                                                                                                                                                                                                                                                                                                                                                                                                                                                                                                                                                                              |
| Keywords:                       | driving under the influence, alcohol, mortality, helmet use, airbag                                                                                                                                                                                                                                                                                                                                                                                                                                                                                                                                                                                                                                                                                                                                                                                                                                                                                                                                                                                                                                                 |
|                                 |                                                                                                                                                                                                                                                                                                                                                                                                                                                                                                                                                                                                                                                                                                                                                                                                                                                                                                                                                                                                                                                                                                                     |

SCHOLARONE™  
Manuscripts

1  
2  
3 **The effect of lowering the legal blood alcohol concentration limit on driving under**  
4 **the influence (DUI) in southern Taiwan – a cross-sectional retrospective analysis**  
5

6 Yu-Chin Tsai<sup>1\*</sup>, MD., M.Sc.; Shao-Chun Wu<sup>2\*</sup>, MD.; Jin-Fu Huang<sup>1</sup>, MD.; Spencer  
7 C.H. Kuo<sup>3</sup>, M.D; Cheng-Shyuan Rau<sup>1</sup>, M.D.; Peng-Chen Chien<sup>3</sup>, M.Sc. Hsiao-Yun  
8 Hsieh<sup>3</sup>, M.Sc.; Ching-Hua Hsieh<sup>3</sup>, M.D., PhD.  
9  
10  
11  
12  
13  
14  
15  
16

17 <sup>1</sup> Department of Neurosurgery, Kaohsiung Chang Gung Memorial Hospital and Chang  
18 Gung University College of Medicine, Taiwan  
19

20 <sup>2</sup> Department of Anesthesiology, Kaohsiung Chang Gung Memorial Hospital and  
21 Chang Gung University College of Medicine, Taiwan  
22  
23

24 <sup>3</sup> Department of Plastic Surgery, Kaohsiung Chang Gung Memorial Hospital and Chang  
25 Gung University College of Medicine, Taiwan  
26  
27  
28  
29

30 Yu-Chin Tsai; e-mail: vagility@gmail.com  
31  
32

33 Shao-Chun Wu; e-mail: shaochunwu@gmail.com  
34  
35

36 Jin-Fu Huang; e-mail: stillloop@gmail.com  
37  
38

39 Spencer C.H. Kuo; e-mail: spenc19900603@gmail.com  
40  
41

42 Cheng-Shyuan Rau; e-mail: ersh2127@cloud.cgmh.org.tw  
43  
44

45 Peng-Chen Chien; e-mail: VENU\_CHIEN@hotmail.com  
46  
47

48 Hsiao-Yun Hsieh; e-mail: sylvia19870714@hotmail.com  
49  
50

51 Ching-Hua Hsieh; e-mail: m93chinghua@gmail.com  
52  
53

54 \*indicated equal contribution to the authorship by Y.-C.T. & S.-C.W.  
55

56 Corresponding author: Ching-Hua Hsieh, M.D., PhD., FACS.  
57

58 Department of Plastic Surgery, Kaohsiung Chang Gung Memorial Hospital and Chang  
59  
60

1  
2  
3 Gung University College of Medicine, Taiwan  
4

5 No.123, Ta-Pei Road, Niao-Song District, Kaohsiung City 833, Taiwan  
6

7 Tel: 886-7-3454746; E-mail: m93chinghua@gmail.com  
8  
9

10  
11  
12 **ABSTRACT**  
13

14 **Objectives:** To profile the epidemiological changes of driving under the influence  
15 (DUI) in southern Taiwan after lowering the legal blood alcohol concentration (BAC)  
16  
17 limit from 50 to 30 mg/dL in 2013.  
18  
19

20  
21 **Setting:** Level 1 trauma medical center in southern Taiwan.  
22

23  
24 **Participants:** Data from 7,447 patients (4,375 males and 3,072 females) were retrieved  
25 from the Trauma Registry System of a single trauma center to examine DUI status,  
26 patient characteristics, and accident-related factors before and after the sanction change.  
27  
28 The factors include gender, age, vehicle type, airbag use in car crashes and helmet use  
29 in motorcycle crashes, time of crashes, BAC, Abbreviated Injury Score (AIS), injury  
30 severity score (ISS), and mortality.  
31  
32

33  
34 **Results:** Our results indicated that the percentage of DUI patients significantly declined  
35 from 10.99% (n=373) to 6.64% (n=269) with the lowered BAC limit. Use of airbags in  
36 car crashes (OR: 0.30, 95% CI: 0.10-0.88, p = 0.007) and helmet use in motorcycle  
37 crashes (OR: 0.20, 95% CI: 0.15-0.26, p < 0.001) was less in DUI patients compared  
38 to that in non-DUI patients after sanction change with significant negative correlation.  
39  
40 DUI behavior increased accident mortality risk before the sanction (OR: 4.33, 95% CI:  
41 2.20-8.54) and even more so after the sanction (OR: 5.60, 95% CI: 3.16-9.93). The  
42 difference in OR for mortality before and after the sanction was not significant (p =  
43 0.568).  
44  
45

46  
47 **Conclusion:** This study revealed that lowering the BAC limit to 30 mg/dL significantly  
48  
49  
50  
51  
52  
53  
54  
55  
56  
57  
58  
59  
60

1  
2  
3 reduced the number of DUI events, but failed to result in a significant reduction in  
4  
5 mortality in these trauma patients.  
6

7  
8 **Keywords** driving under the influence; alcohol; mortality; helmet use; airbag  
9

10  
11  
12 **Strengths and limitations of this study**  
13

- 14  
15 1. This study revealed that, with the legal blood alcohol concentration limit lowered  
16  
17 from 50 to 30 mg/dL, the percentage of patients driving under the influence of  
18  
19 alcohol declined, the percentage of airbag use in car crashes decreased, while  
20  
21 helmet use in motorcycle crashes increased.  
22  
23  
24 2. However, the lowering legal blood alcohol concentration limit from 50 to 30 mg/dL  
25  
26 did not significantly reduce the odds of mortality in the patients after sanction  
27  
28 change.  
29  
30  
31 3. This study was limited by its retrospective design and the data collected from one  
32  
33 level I regional trauma center.  
34  
35  
36  
37  
38  
39  
40  
41  
42  
43  
44  
45  
46  
47  
48  
49  
50  
51  
52  
53  
54  
55  
56  
57  
58  
59  
60

## INTRODUCTION

According to the World Health Organization (WHO), over 1.2 million people die each year in road traffic accidents, with 75% of road traffic fatalities occurring in men in the economically active age ranges <sup>1</sup>. It is estimated that over 90% of road traffic deaths occur in low-income and middle-income countries, causing significant GDP losses of up to 5% <sup>2</sup>. Alcohol intoxication has been proposed as one of the primary causes of all road accidents. Driving under the influence (DUI) of alcohol increases the risk of accident as well as the severity of the accident injury, and results in longer hospital stays, higher healthcare costs, and poorer outcomes compared to drivers in non-DUI accidents <sup>3-6</sup>. When the driver's blood alcohol concentration (BAC) exceeds 50 mg/dL, the risk and severity of traffic accidents increase remarkably <sup>7-10</sup>.

To reduce alcohol-impaired driving, stricter laws have been implemented including minimum legal drinking ages, taxes on beer, BAC limits, the provision of alcohol education, and the establishment of drug and alcohol treatment programs <sup>11</sup>. Based on the deterrence theory, changes to existing sanctions, such as the lowering of BAC limits, are commonly used to reduce DUI. DUI-related traffic accidents have caused over 3000 deaths and approximately 110,000 injuries in Taiwan over the past decade (2007-2016) <sup>12</sup>. Nevertheless, DUI was not deemed a serious crime prior to April 1999. It was legal to drive with BAC of 50 mg/dL. Drivers with BAC between 50 and 110 mg/dL would violate Road Traffic Security Rules, and would face license suspension, revocation, or pecuniary punishment. Only drivers with BAC > 110 mg/dL violated Article 185 of the Criminal Law, but would face imprisonment of less than a year and fines of less than New Taiwan Dollars (NTD) 30,000 (~ US dollars 1,000).



1  
2  
3 In recent years, DUI has received increased media attention as alcohol-impaired  
4 traffic crashes are frequently reported. A series of amendments were made to the Road  
5 Traffic Management and Penalty Act, Road Traffic Security Rules, and Article 185 of  
6 the Criminal Law <sup>13</sup>, including the most recent amendment to Road Traffic Security  
7 Rules in 2013, which lowers the BAC limit from 50 mg/dL to 30 mg/dL. In addition,  
8 penalties were increased from NTD 15,000-60,000 (~ US \$500-2,000) to NTD 15,000-  
9 90,000 (~ US \$500-3,000). According to the national statistics, drunk-driving casualties  
10 reduced after these sanctions <sup>13</sup>. However, data on monthly injuries and deaths caused  
11 by DUI-related crashes and number of monthly DUI violations comes from sobriety  
12 checkpoints by the police. Specific data on the impact of DUI on medical service  
13 utilization after changes to sanctions are not available. The purpose of this study was to  
14 compare the epidemiological profile of DUI in southern Taiwan before (July 2009 to  
15 December 2012) and after (July 2013 to December 2016) the changes to sanctions using  
16 data from the Trauma Registry System. We examined the profiles of DUI patients  
17 before and after the sanction change, as well as DUI crash characteristics to define the  
18 prognosis and risk factors of DUI related injury and the effect of sanction change on  
19 these factors.  
20  
21  
22  
23  
24  
25  
26  
27  
28  
29  
30  
31  
32  
33  
34  
35  
36  
37  
38  
39  
40  
41  
42  
43  
44  
45  
46  
47  
48  
49  
50  
51  
52  
53  
54  
55  
56  
57  
58  
59  
60

## PATIENTS AND METHODS

### Patient and Public Involvement.

The patients and the public were not involved in this study.

### Methods

We conducted a retrospective study of patient data collected by the Trauma Registry System between July 2009 and December 2016 to investigate clinical outcomes and baseline features of DUI before and after changes to sanctions. Only patients who were drivers in car/motorcycle crashes that occurred in Kaohsiung and Pingtung areas of Taiwan and were hospitalized after their emergency room (ER) visit were included in the study. Twenty-three patients with incomplete data were excluded, as well as those whose visit took place between January 2013 and June 2013, the period when amendments to the Road Traffic Management and Penalty Act were announced and implemented. This study was approved by the institutional review board (IRB) of the Kaohsiung Chang Gung Memorial Hospital (reference number 201701844B0), a 2686-bed facility and Level I regional trauma center that provides primary care to trauma patients primarily from southern Taiwan<sup>14,15</sup>. Data from 7,447 patients were used for the analysis.

BAC tests are ordered for patients in the ER with clinical suspicion of DUI. For the study, patients with BAC > 30 mg/dL (the threshold for DUI) were categorized into two groups according to when their visit took place: July 2009 to December 2012 (before increased sanctions; total 3,395 patients), and July 2013 to December 2016 (after increased sanctions; total 4,052 patients). Detailed patient information was retrieved from the Trauma Registry System of our institution, and included the

1  
2  
3 following variables: age, gender, type of vehicle crashes, time and location of crashes,  
4  
5 airbag use in car crashes, helmet use in motorcycle crashes, BAC, hospital length of  
6  
7 stay (LOS), in-hospital mortality, and associated trauma in each body region. The  
8  
9 Abbreviated Injury Score (AIS) was used to evaluate injury severity in the following  
10  
11 regions: head/neck, face, chest, abdomen, extremities (including pelvis), and external.  
12  
13 Some groups of patients with higher AIS scores would be combined for analysis due to  
14  
15 inadequate patient number. The Injury Severity Score (ISS) was calculated by summing  
16  
17 the square of the three highest AIS scores in each region <sup>16</sup>.  
18  
19  
20  
21  
22  
23

24 Demographic traits and clinical variables were compared before and after sanction  
25  
26 change using the Chi-square test, Student's *t*-test and Mann-Whiney U-test. Differences  
27  
28 in parameters between DUI and non-DUI groups were also examined. Parameters were  
29  
30 presented as numbers (percentage), median  $\pm$  interquartile range (IQR), or mean  $\pm$   
31  
32 standard deviation (SD). Logistic regression was used to define changes in baseline  
33  
34 traits and clinical outcomes in the DUI and non-DUI groups before and after increased  
35  
36 sanctions. Breslow-Day statistics testing was performed to examine homogeneity in  
37  
38 different stratifications. Besides, we also analyzed the ratio of single vehicle nighttime  
39  
40 (SVN) crashes to multiple vehicle daytime (MVD) crashes as a proxy measure used in  
41  
42 many studies for alcohol involvement <sup>17,18</sup>. R software (Version 3.3.3; package =  
43  
44 cartography, method = choroLayer) was used to geographically present the change in  
45  
46 the number of patients with DUI in southern Taiwan. The trend in the number of DUI  
47  
48 patients from 2009 to 2016 was also demonstrated. All other analysis was performed  
49  
50 using SAS software (Version 9.4). Statistical significance was defined as  $p < 0.05$ .  
51  
52  
53  
54  
55  
56  
57

## 58 RESULTS

59  
60

1  
2  
3 A total of 7,447 patients, including 4,375 males and 3,072 females, were included  
4  
5 in this study. The average age at the time of crash was  $43.68 \pm 18.70$  (range: 11-90  
6  
7 years). Of these patients, 642 (8.6%) were classified as DUI according to the amended  
8  
9 definition of BAC  $\geq 30$  mg/dL. Most of the traffic accidents were motorcycle crashes  
10  
11 (7,237 patients; 97.2%), and often happened between 6 AM – 2 PM (3,173 patients;  
12  
13 42.6%). Motorcyclists were wearing a helmet at the time of the crash in 88.93% (n =  
14  
15 7,237) of the patients, whereas 63.81% (n = 134) of car drivers had airbag protection.  
16  
17 The average mortality was 1.34%, and median hospital LOS was six days.  
18  
19  
20  
21  
22  
23

24 As shown in Table 1, 3,395 patients were sent to our ER before the sanction change  
25  
26 and 4,052 patients after. In both time periods, patients tended to be males between the  
27  
28 ages of 40-45. The percentage of DUI significantly declined from 10.99% (n = 373) to  
29  
30 6.64% (n = 269) after sanction (Figure 1), and the average BAC decreased from 21.19  
31  
32 mg/dL to 12.31 mg/dL. This trend was observed across different regions in southern  
33  
34 Taiwan, as shown in Figure 2. The percentage of airbag use in car accidents decreased,  
35  
36 while helmet use in motorcycle accidents increased. No significant changes in mortality  
37  
38 and hospital stay were found in our analysis. Patient numbers do not vary by season or  
39  
40 day of the week, although a slight decrease was observed in the spring before sanction.  
41  
42  
43  
44  
45  
46

47 Examination of demographic features and clinical outcomes in DUI and non-DUI  
48  
49 patients revealed that patients in the DUI group were mostly male (88.47%) compared  
50  
51 to the non-DUI group (55.94%) (Table 2). Patients in the DUI group were significantly  
52  
53 younger than those in the non-DUI ( $p < 0.001$ ) group. Reduced use of airbags in car  
54  
55 crashes and helmets in motorcycle crashes was found in higher proportion in the DUI  
56  
57 group than in the non-DUI group. DUI patients tended to have significantly higher ISS  
58  
59  
60

1  
2  
3 (13 vs. 9, respectively,  $p < 0.001$ ) and longer hospital stay (8 days vs. 6 days,  
4 respectively,  $p < 0.001$ ) than non-DUI patients. A significantly higher mortality rate  
5 was found in DUI patients than in non-DUI (4.67% vs. 1.03%, respectively,  $p < 0.001$ ).  
6  
7 No significant seasonal differences were found in our analysis between the DUI and  
8 non-DUI groups. Time of visit to the ER differed for the DUI patients compared to the  
9 non-DUI patients. Most DUI patients visited ER between 10 PM and 6 AM (50.31%),  
10 while only 13.33% of non-DUI patients visited at this time. Additionally, DUI crashes  
11 tended to occur on weekends (18.69% on Saturday and 19.31% on Sunday).  
12  
13  
14  
15  
16  
17  
18  
19  
20  
21  
22  
23

24 Table 3 compares odds ratios (OR) for different stratified parameters before and  
25 after sanction. Males still showed increased odds of DUI (Crude OR 6.01, 95% CI:  
26 4.69-7.69), but sanction change showed no significant effect on gender in terms of DUI  
27 behavior. DUI behavior increased the crash mortality risk before sanction (OR: 4.33,  
28 95% CI: 2.20-8.54), and even more so after sanction (OR: 5.60, 95% CI: 3.16-9.93).  
29 Difference in OR of mortality before and after sanction change was not significant ( $p =$   
30 0.568). Regarding time of crash, a greater number of DUI patients appeared between  
31 10 PM and 6 AM (OR 12.70) than between 2 PM and 10 PM (3.04) and between 6 AM  
32 and 2 PM (baseline). This trend was significantly exaggerated after sanction, which  
33 showed OR of 20.76 in the period 10 PM - 6 AM and OR 5.50 in the period 2 PM - 10  
34 PM compared to the baseline OR in the period 6 AM - 2 PM. There was no significant  
35 correlation between airbag protection and DUI behavior in car crashes (OR 0.49, 95%  
36 CI: 0.20-1.18) before sanction. However, car crashes with airbag protection were less  
37 frequent in DUI patients than in non-DUI patients after sanction (OR: 0.30, 95% CI:  
38 0.10-0.88) with a significantly negative correlation. Similar results were found in  
39 motorcycle crashes. Helmet use in motorcycle crashes was a protective factor with a  
40  
41  
42  
43  
44  
45  
46  
47  
48  
49  
50  
51  
52  
53  
54  
55  
56  
57  
58  
59  
60

1  
2  
3 negative correlation to DUI behavior. This negative correlation was reinforced by  
4  
5 sanction change. The OR of helmet use and DUI was 0.42 (95% CI: 0.32-0.55) before  
6  
7 sanction and 0.30 (95% CI: 0.15-0.26) after sanction with significant difference ( $p <$   
8  
9 0.001). Season of crash had no effect on DUI behavior before sanction or after sanction.  
10  
11 Workdays were significantly negatively correlated with DUI behavior as compared to  
12  
13 weekends (Saturday and Sunday) both before and after sanction change.  
14  
15  
16  
17  
18

19 The AIS of different regions were examined on DUI and non-DUI patients, and  
20  
21 they indicated that DUI patients were more susceptible to injuries to the head and neck,  
22  
23 face, thorax, and abdomen than non-DUI patients (Table 4). No significant difference  
24  
25 was found in the external injuries between DUI and non-DUI patients. However,  
26  
27 patients with DUI were less likely than non-DUI patients to suffer from severe injury  
28  
29 to the extremities.  
30  
31  
32  
33  
34  
35  
36  
37  
38  
39  
40  
41  
42  
43  
44  
45  
46  
47  
48  
49  
50  
51  
52  
53  
54  
55  
56  
57  
58  
59  
60

## DISCUSSION

Our analysis presented various factors associated with DUI behavior, including gender, mortality, time of the day, day of the week, use of airbags in cars, and use of helmets among motorcyclists. In this study, females accounted for a minor proportion (12%) of DUI patients, consistent with previous research<sup>19</sup>. Complex causal relationships in physiological and social factors may account for the difference in males and females involved in DUI. Our previous studies also reported more males than females with traffic crashes sent to our emergency room<sup>14,20</sup>. Compared to females, males had a higher risk of motorcycle accidents<sup>21,22</sup>, which accounted for approximately 60% of injuries in southern Taiwan<sup>14,20</sup>. Male/female differences in alcoholic liver injury<sup>23</sup>, alcohol-induced brain injury<sup>24</sup>, and alcohol-related behavioral and medical problems have also been reported<sup>25-27</sup>. Increased vehicle performance and a higher number of safety features lead to greater risk-taking behavior by the driver<sup>28</sup>, and our results indicated that drivers using airbags in their vehicles show a significantly lower OR of being in a DUI crash. Although the use of airbags going down may be due to the reason that DUI drivers tend to drive older vehicles, not wear a safety belt, and speed, this finding could indicate a relationship between the value placed on safety (e.g., purchase cars with more safety features) and the avoidance of risk-taking behaviors such as DUI. Our study also examined helmet use in motorcyclists. It has been mandatory for motorcyclists in Taiwan to wear helmets since June 1997, and helmets were used by 90% of patients in this study. Previous studies have reported helmet use to be a protective factor or strong predictor of motorcycle accidents<sup>21,29-31</sup>. Our study also found that helmet use plays a significantly protective role in DUI crashes, supporting findings from Ohio, USA and Iran that suggest that motorcyclists involved in alcohol-involved crashes are significantly less likely to wear a helmet<sup>32,33</sup>. This

1  
2  
3 decreased post-sanction helmet use rate in our data may contributed to our higher  
4 mortality in post-sanction change DUI drivers.  
5  
6  
7  
8  
9

10 Our analysis is consistent with findings in Taiwan based on national statistics <sup>13</sup>  
11 that report a significant reduction in DUI events after sanction change. Previous studies  
12 report reductions in both accidents and fatalities when legal limits for BAC are lowered  
13 to 50 mg/dL <sup>34,35</sup>. A significant decrease of 3.7% (95% CI: 0.9–6.5%) in fatally injured  
14 drivers with a BAC level equal to or greater than 50 mg/dL was found following the  
15 sanction change <sup>36</sup>. A recent meta-analysis examined the impact of lowering the legal  
16 BAC limit to 50 mg/dL, and found an 11.1% decrease in rates of fatal alcohol-related  
17 crashes <sup>37</sup>. In this study, the proportion of male and female DUI patients and overall  
18 mortality rate did not change after the sanction change. However, while the proportions  
19 of males and females did not change, other elements of the patient composition changed  
20 with BAC 30 mg/dL. In our study, the percentage of DUI patients significantly  
21 decreased from 10.99% to 6.6% and was accompanied by a decline in average BAC.  
22 The decline in DUI events can be seen in the different geographical regions of  
23 Kaohsiung and Pingtung surrounding our hospital. Time of injury appears to play a role  
24 in severity of injury. It has been reported that drivers not under the influence of alcohol  
25 suffer more severe injuries between midnight and early morning compared to early  
26 night-time <sup>38</sup>. Findings from other studies have indicated that injuries involving drunk  
27 drivers are influenced less by geographic and environmental factors than by the nature  
28 of collision and time of accident <sup>39</sup>. Our results indicate different temporal distribution  
29 (in weekday and time of day, but not in seasons) in the DUI and non-DUI groups. Most  
30 non-DUI patients visited the ER between early morning and afternoon (6 AM – 2 PM),  
31 but DUI patients tend to search for medical aid between 10 PM to 6 AM (50.31%). A  
32  
33  
34  
35  
36  
37  
38  
39  
40  
41  
42  
43  
44  
45  
46  
47  
48  
49  
50  
51  
52  
53  
54  
55  
56  
57  
58  
59  
60



1  
2  
3 previous study in Hong Kong indicated a similar temporal pattern in DUI using a  
4 slightly different time framework <sup>40</sup>. This study found that most DUI events occurred  
5 between 3 PM – 11 PM (39.5%) and 11 PM - 7 AM (29.8%). Consistent with our  
6 findings, a higher prevalence of DUI on weekends than on weekdays is reported in other  
7 studies <sup>41</sup>. In addition to above analysis, there were similar numbers over SVNs pre-  
8 and post-sanction change. Post-sanction SVN/MVD ratio significant drop to 0.48 from  
9 pre-sanction SVN/MVD ratio with 0.60. It also indicated sanction change had effect on  
10 the reduction of DUI behavior.  
11  
12  
13  
14  
15  
16  
17  
18  
19  
20  
21  
22  
23

24 Although our study found that DUI events significantly decreased after sanction  
25 change, the increased point estimate for OR of DUI on mortality was not significant.  
26 Moreover, the post-sanction mortality OR in DUI was significantly higher than pre-  
27 sanction-DUI. It may be explained by these DUI drivers after sanction change is more  
28 addicted to alcohol and was associated with lower helmet use rate. Studies have shown  
29 that alcohol impairs driving ability, and that the intoxicated driver is more likely to  
30 cause fatal road traffic accidents <sup>42</sup>, while other research has found the risk of mortality  
31 is not higher in patients with positive BAC <sup>3</sup>. Some studies have found that serum  
32 ethanol is independently associated with increased mortality <sup>43,44</sup>. Furthermore, some  
33 studies have proposed alcohol use can have a protective effect in trauma patients <sup>3,45,46</sup>.  
34 In this study, we did not find a protective role for DUI in our analysis of the association  
35 between DUI and AIS. These findings indicated that BAC limit, consistent with  
36 deterrence theory, can reduce alcohol-impaired driving <sup>47,48</sup>, but may be not enough to  
37 result in a significant reduction in mortality of those trauma patients. This may indicate  
38 that other preventative policies, such as beer taxes, minimum legal drinking ages, and  
39 administrative license revocation, should be considered <sup>49</sup>. In fact, drivers with or  
40  
41  
42  
43  
44  
45  
46  
47  
48  
49  
50  
51  
52  
53  
54  
55  
56  
57  
58  
59  
60

1  
2  
3 without DUI had more heterogeneity in the factors that may affect injury severity <sup>50</sup>.  
4  
5 The bias may exist in the analysis with multivariate logistic regression for the  
6  
7 association between the injury severity and the drivers with or without DUI, thus may  
8  
9 comprise a limitation in this study.  
10  
11  
12  
13  
14

15 There are some other limitations to our study. First, the analysis was based on data  
16  
17 from the trauma registry system of a level I regional trauma center in southern Taiwan.  
18  
19 These results may not be externally valid. Besides, our selected statistical methods with  
20  
21 limited parameters may not clarify the contributing factors and outcomes of DUI  
22  
23 crashes due to its complex interaction <sup>51</sup>. Second, there were differences in the baseline  
24  
25 characteristics of patients admitted after traffic crashes before and after sanction  
26  
27 change. The differences in baseline characteristics may have confounded results and  
28  
29 observed differences may have implied the effect of sanction change. Third, the  
30  
31 combined use of psychoactive medication and alcohol may increase the risk of having  
32  
33 an accident <sup>52,53</sup>. This confounder was not controlled in our study, although this bias is  
34  
35 random. Fourth, patients seeking medical care due to traffic accident did not routinely  
36  
37 receive a blood alcohol test unless they showed symptoms of being alcohol-impaired  
38  
39 or unconsciousness. This may underestimate the effect of DUI in our analysis. Fifth,  
40  
41 our registry system is not able to report exact time elapsed from injury to an alcohol  
42  
43 test. However, the mean transport time for the patients transported by emergency  
44  
45 medical service to the hospital was  $18.3 \pm 7.9$  min according to our data and about 12  
46  
47 min according to Taiwan government data from January 2009 to June 2009. Thus, the  
48  
49 bias may be minimal. Furthermore, our registry system did not exclude the repeated  
50  
51 DUI patients, although these drivers may be a small group in our study subjects, they  
52  
53 may confound our statistical results. Finally, there may exist bias in the outcome  
54  
55  
56  
57  
58  
59  
60

1  
2  
3 assessment with control of alcohol consumption, vehicle miles travelled, and vehicles  
4  
5 and motorcycles registered, which were lack in the registered trauma database.  
6  
7  
8  
9

## 10 **CONCLUSION**

11  
12 This study revealed that lowering the legal limit for BAC to 30 mg/dL significantly  
13  
14 reduced DUI events. Airbag use in car accidents and helmet use in motorcycle accidents  
15  
16 after sanction change was less in DUI patients than in non-DUI patients with significant  
17  
18 negative correlation. Sanction change failed to result in a significant reduction in  
19  
20 mortality in these trauma patients.  
21  
22  
23  
24  
25

## 26 **ACKNOWLEDGEMENTS**

27  
28 We thank the Biostatistics Center at the Kaohsiung Chang Gung Memorial Hospital for  
29  
30 their help with the statistical analysis.  
31  
32  
33  
34

## 35 **FUNDING**

36  
37 This research was supported by a grant from Chang Gung Memorial Hospital  
38  
39 CGRPG8F0011.  
40  
41  
42  
43

## 44 **AUTHOR CONTRIBUTIONS**

45  
46 Y.-C.T. wrote the manuscript, S.-C.W. revised the manuscript, J.-F.H. assisted with the  
47  
48 study design, S.C.H. K. was involved in the literature review, C.-S.R. was responsible  
49  
50 for the integrity of registered data, P.-C.C performed the statistical analyses and edited  
51  
52 the tables, H.-Y.H. proofread the manuscript, and C.-H.H. designed the study and  
53  
54 contributed to the data analysis and interpretation. All authors read and approved the  
55  
56 final manuscript.  
57  
58  
59  
60

## CONFLICTS OF INTEREST

The authors report no conflicts of interest in this work

## DATA SHARING

No additional data are available.

## REFERENCES

1. World Health Organization. Global status report on road safety. 2015.
2. World Health Organization. World report on road traffic injury prevention. 2004.
3. Hsieh CH, Su LT, Wang YC, et al. Does alcohol intoxication protect patients from severe injury and reduce hospital mortality? The association of alcohol consumption with the severity of injury and survival in trauma patients. *Am Surg*. 2013;79(12):1289-1294.
4. Lee MH, Mello MJ, Reinert S. Emergency department charges for evaluating minimally injured alcohol-impaired drivers. *Ann Emerg Med*. 2009;54(4):593-599.
5. Martin TL, Solbeck PA, Mayers DJ, et al. A review of alcohol-impaired driving: the role of blood alcohol concentration and complexity of the driving task. *J Forensic Sci*. 2013;58(5):1238-1250.
6. O'Keeffe T, Rhee P, Shafi S, et al. Alcohol use increases diagnostic testing, procedures, charges, and the risk of hospital admission: a population-based study of injured patients in the emergency department. *Am J Surg*. 2013;206(1):16-22.
7. Blomberg RD, Peck RC, Moskowitz H, et al. The Long Beach/Fort Lauderdale relative risk study. *J Safety Res*. 2009;40(4):285-292.
8. Fell JC, Voas RB. The effectiveness of a 0.05 blood alcohol concentration (BAC)

- 1  
2  
3 limit for driving in the United States. *Addiction*. 2014;109(6):869-874.  
4  
5  
6 9. Taylor B, Irving HM, Kanteres F, et al. The more you drink, the harder you fall: a  
7  
8 systematic review and meta-analysis of how acute alcohol consumption and injury  
9  
10 or collision risk increase together. *Drug Alcohol Depend*. 2010;110(1-2):108-116.  
11  
12  
13 10. Taylor B, Rehm J. The relationship between alcohol consumption and fatal motor  
14  
15 vehicle injury: high risk at low alcohol levels. *Alcohol Clin Exp Res*.  
16  
17 2012;36(10):1827-1834.  
18  
19  
20 11. Thomas F. Babor. Alcohol: no ordinary commodity--a summary of the second  
21  
22 edition. *Addiction*. 2010;105(5):769-779.  
23  
24  
25 12. Ministry of Interior ROCM. Statistics of Police Administration. 2018.  
26  
27  
28 13. Chan YS, Chen CS, Huang L, Peng YI. Sanction changes and drunk-driving  
29  
30 injuries/deaths in Taiwan. *Accid Anal Prev*. 2017;107(10):102-109.  
31  
32  
33 14. Hsieh CH, Hsu SY, Hsieh HY, Chen YC. Differences between the sexes in  
34  
35 motorcycle-related injuries and fatalities at a Taiwanese level I trauma center.  
36  
37 *Biomed J*. 2017;40(2):113-120.  
38  
39  
40 15. Hsieh CH, Liu HT, Hsu SY, et al. Motorcycle-related hospitalizations of the  
41  
42 elderly. *Biomed J*. 2017;40(2):121-128.  
43  
44  
45 16. Kuo SCH, Kuo PJ, Chen YC, et al. Comparison of the new Exponential Injury  
46  
47 Severity Score with the Injury Severity Score and the New Injury Severity Score  
48  
49 in trauma patients: A cross-sectional study. *PLoS One*. 2017;12(11):e0187871.  
50  
51  
52 17. Voas RB, Romano E, Peck R. Validity of surrogate measures of alcohol  
53  
54 involvement when applied to nonfatal crashes. *Accid Anal Prev*. 2009;41(3):522-  
55  
56 530.  
57  
58  
59 18. Heeren T, Smith RA, Morelock S, Hingson RW. Surrogate measures of alcohol  
60  
involvement in fatal crashes: Are conventional indicators adequate? *J Safety Res*.

- 1  
2  
3 1985;16(3):127-133.  
4  
5  
6 19. Maxwell JC, Freeman J. Gender differences in DUI offenders in treatment in  
7  
8 Texas. *Traffic Inj Prev.* 2007;8(4):353-360.  
9  
10  
11 20. Tang CE, Liu HT, Kuo PJ, et al. Impact of Sexual Dimorphism on Trauma Patterns  
12  
13 and Clinical Outcomes of Patients with a High-Risk Score of the Osteoporosis Self-  
14  
15 Assessment Tool for Asians: A Propensity Score-Matched Analysis. *Int J Environ*  
16  
17 *Res Public Health.* 2018;15(3): E418.  
18  
19  
20 21. Apidechkul T, Laingoen O, Suwannaporn S, Tamornpark R. Factors Influencing  
21  
22 Motorcycle Accidents among Hill Tribe Youths in Chiang Rai, Thailand. *Thai J*  
23  
24 *Health Res.* 2017;31(6):473-480.  
25  
26  
27 22. Mbanjumucyo G, George N, Kearney A, et al. Epidemiology of injuries and  
28  
29 outcomes among trauma patients receiving prehospital care at a tertiary teaching  
30  
31 hospital in Kigali, Rwanda. *Afr J Emerg Med.* 2016;6(4):191-197.  
32  
33  
34 23. Eagon PK. Alcoholic liver injury: Influence of gender and hormones. *World J*  
35  
36 *Gastroenterol.* 2010;16(11):1377.  
37  
38  
39 24. Hommer DW. Male and female sensitivity to alcohol-induced brain damage.  
40  
41 *Alcohol Res Health.* 2003;27(2):181-185.  
42  
43  
44 25. Bradley KA, Badrinath S, Bush K, et al. Medical risks for women who drink  
45  
46 alcohol. *J Gen Intern Med.* 1998;13(9):627-639.  
47  
48  
49 26. Nolen-Hoeksema S. Gender differences in risk factors and consequences for  
50  
51 alcohol use and problems. *Clin Psychol Rev.* 2004;24(8):981-1010.  
52  
53  
54 27. Nolen-Hoeksema S, Hilt L. Possible contributors to the gender differences in  
55  
56 alcohol use and problems. *J Gen Psychol.* 2006;133(4):357-374.  
57  
58  
59 28. Horswill MS, Coster ME. The effect of vehicle characteristics on drivers' risk-  
60  
taking behaviour. *Ergonomics.* 2002;45(2):85-104.

- 1  
2  
3 29. Buckley L, Bingham CR, Flannagan CA, et al. Observation of motorcycle helmet  
4 use rates in Michigan after partial repeal of the universal motorcycle helmet law.  
5  
6 *Accid Anal Prev.* 2016;95(Pt A):178-186.  
7  
8  
9  
10 30. Kuo SCH, Kuo PJ, Rau CS, et al. The protective effect of helmet use in motorcycle  
11 and bicycle accidents: a propensity score-matched study based on a trauma registry  
12 system. *BMC Public Health.* 2017;17(1):639.  
13  
14  
15  
16  
17 31. Lin KC, Peng SH, Kuo PJ, et al. Patterns Associated with Adult Mandibular  
18 Fractures in Southern Taiwan-A Cross-Sectional Retrospective Study. *Int J*  
19 *Environ Res Public Health.* 2017;14(7).  
20  
21  
22  
23  
24 32. Heydari ST, Vossoughi M, Akbarzadeh A, et al. Prevalence and risk factors of  
25 alcohol and substance abuse among motorcycle drivers in Fars province, Iran. *Chin*  
26 *J Traumatol.* 2016;19(2):79-84.  
27  
28  
29  
30  
31 33. Maistros A, Schneider WHt, Savolainen PT. A comparison of contributing factors  
32 between alcohol related single vehicle motorcycle and car crashes. *J Safety Res.*  
33 2014;49:129-135.  
34  
35  
36  
37  
38 34. Hingson R, Fau. HT, Winter M. Effects of Maine's 0.05% legal blood alcohol level  
39 for drivers with DWI convictions. *Public Health Rep.* 1998;113(5):440-446.  
40  
41  
42  
43 35. Homel R. Drink-driving law enforcement and the legal blood alcohol limit in New  
44 South Wales. *Accid Anal Prev.* 1994;26(2):147-155.  
45  
46  
47  
48 36. Blais E, Bellavance F, Marcil A, Carnis L. Effects of introducing an administrative  
49 .05% blood alcohol concentration limit on law enforcement patterns and alcohol-  
50 related collisions in Canada. *Accid Anal Prev.* 2015;82:101-111.  
51  
52  
53  
54 37. Fell JC, Scherer M. Estimation of the Potential Effectiveness of Lowering the  
55 Blood Alcohol Concentration (BAC) Limit for Driving from 0.08 to 0.05 Grams  
56 per Deciliter in the United States. *Alcohol Clin Exp Res.* 2017;41(12):2128-2139.  
57  
58  
59  
60

- 1  
2  
3 38. Chen H, Chen Q, Chen L, Zhang G. Analysis of risk factors affecting driver injury  
4 and crash injury with drivers under the influence of alcohol (DUI) and non-DUI.  
5  
6 *Traffic Inj Prev.* 2016;17(8):796-802.  
7  
8  
9  
10 39. Velmurugan S, Padma S, Madhu E, et al. A study of factors influencing the severity  
11 of road crashes involving drunk drivers and non drunk drivers. *Res Transport Econ.*  
12  
13 2013;38(1):78-83.  
14  
15  
16 40. Li YC, Sze NN, Wong SC. Spatial-temporal analysis of drink-driving patterns in  
17 Hong Kong. *Accid Anal Prev.* 2013;59:415-424.  
18  
19  
20 41. Damsere-Derry J, Palk G, King M. Prevalence of alcohol-impaired driving and  
21 riding in northern Ghana. *Traffic Inj Prev.* 2016;17(3):226-232.  
22  
23  
24 42. Impinen A, Makela P, Karjalainen K, et al. High mortality among people suspected  
25 of drunk-driving. An 18-year register-based follow-up. *Drug Alcohol Depend.*  
26  
27 2010;110(1-2):80-84.  
28  
29  
30 43. Pories SE, Gamelli RL, Vacek P, et al. Intoxication and injury. *J Trauma.*  
31  
32 1992;32(1):60-64.  
33  
34  
35 44. Luna GK, Maier RV, Sowder L, et al. The influence of ethanol intoxication on  
36 outcome of injured motorcyclists. *J Trauma.* 1984;24(8):695-700.  
37  
38  
39 45. Cherry RA, Nichols PA, Snavelly TM, et al. Resource utilization and outcomes of  
40 intoxicated drivers. *J Trauma Manag Outcomes.* 2010;4:9.  
41  
42  
43 46. Plurad D, Demetriades D, Gruzinski G, et al. Motor vehicle crashes: the association  
44 of alcohol consumption with the type and severity of injuries and outcomes. *J*  
45  
46  
47  
48  
49  
50  
51  
52  
53  
54 47. Bachmann M, Dixon AL. DWI Sentencing in the United States: Toward Promising  
55  
56  
57  
58  
59  
60 48. Yao J, Johnson MB, Beck KH. Predicting DUI decisions in different legal



- 1  
2  
3 environments: investigating deterrence with a conjoint experiment. *Traffic Inj*  
4  
5 *Prev.* 2014;15(3):213-221.  
6  
7  
8 49. Chang K, Wu CC, Ying YH. The effectiveness of alcohol control policies on  
9  
10 alcohol-related traffic fatalities in the United States. *Accid Anal Prev.* 2012;45:406-  
11  
12 415.  
13  
14 50. Behnood ALF. The effects of drug and alcohol consumption on driver-injury  
15  
16 severities in single-vehicle crashes. *Traffic Inj Prev.* 2017;18(5):456-462.  
17  
18 51. Behnood A, Roshandeh AM, Mannering FL. Latent class analysis of the effects of  
19  
20 age, gender, and alcohol consumption on driver-injury severities. *Anal Methods*  
21  
22 *Accid Res.* 2014;3-4:56-91.  
23  
24 52. Bogstrand ST, Gjerde H, Normann PT, et al. Alcohol, psychoactive substances and  
25  
26 non-fatal road traffic accidents--a case-control study. *BMC Public Health.*  
27  
28 2012;12:734.  
29  
30 53. Ricci G, Majori S, Mantovani W, et al. Prevalence of alcohol and drugs in urine of  
31  
32 patients involved in road accidents. *J Prev Med Hyg.* 2008;49(2):89-95.  
33  
34  
35  
36  
37  
38  
39  
40  
41  
42  
43  
44  
45  
46  
47  
48  
49  
50  
51  
52  
53  
54  
55  
56  
57  
58  
59  
60

Table 1. Demographic features and DUI-related variables before and after sanction

|                      | Before sanction | After sanction | <i>p</i>            |
|----------------------|-----------------|----------------|---------------------|
| Gender, n (%)        |                 |                | 0.028               |
| Male                 | 2,041 (60.12%)  | 2,334 (57.6%)  |                     |
| Female               | 1,354 (39.88%)  | 1,718 (42.4%)  |                     |
| Age (years)          | 42.77 (18.34)   | 44.45 (18.97)  | <0.001 <sup>a</sup> |
| DUI, n (%)           |                 |                | <0.001              |
| Yes                  | 373 (10.99%)    | 269 (6.64%)    |                     |
| No                   | 3,022 (89.01%)  | 3,783 (93.36%) |                     |
| BAC (mg/dL)          | 21.19 (62.49)   | 12.31 (47.12)  | <0.001 <sup>a</sup> |
| Car, n (%)           |                 |                | 0.057               |
| Airbag               | 73 (70.19%)     | 61 (57.55%)    |                     |
| No airbag            | 31 (29.81%)     | 45 (42.45%)    |                     |
| Motorcycle, n (%)    |                 |                | <0.001              |
| Helmet               | 2,876 (87.39%)  | 3,560 (90.22%) |                     |
| No Helmet            | 415 (12.61%)    | 386 (9.78%)    |                     |
| ISS                  | 9 (9)           | 9 (9)          | 0.041 <sup>a</sup>  |
| Hospital stay (days) | 6 (7)           | 7 (8)          | 0.198 <sup>a</sup>  |
| Mortality, n (%)     |                 |                | 0.125               |
| Alive                | 3,357 (98.88%)  | 3,990 (98.47%) |                     |
| Death                | 38 (1.12%)      | 62 (1.53%)     |                     |
| Seasons, n (%)       |                 |                | <0.001              |
| Spring               | 605 (17.82%)    | 994 (24.53%)   |                     |
| Summer               | 874 (25.74%)    | 1,008 (24.88%) |                     |
| Autumn               | 970 (28.57%)    | 962 (23.74%)   |                     |
| Winter               | 946 (27.86%)    | 1,088 (26.85%) |                     |

|    |                 |                |                |        |
|----|-----------------|----------------|----------------|--------|
| 1  | Time, n (%)     |                |                | <0.001 |
| 2  |                 |                |                |        |
| 3  | 6AM - 2PM       | 1,351 (39.79%) | 1,822 (44.97%) |        |
| 4  |                 |                |                |        |
| 5  | 2PM - 10PM      | 1,436 (42.30%) | 1,608 (39.68%) |        |
| 6  |                 |                |                |        |
| 7  | 10PM - 6AM      | 608 (17.91%)   | 622 (15.35%)   |        |
| 8  |                 |                |                |        |
| 9  | Weekdays, n (%) |                |                | 0.012  |
| 10 |                 |                |                |        |
| 11 | Monday          | 487 (14.34%)   | 639 (15.77%)   |        |
| 12 |                 |                |                |        |
| 13 | Tuesday         | 553 (16.29%)   | 558 (13.77%)   |        |
| 14 |                 |                |                |        |
| 15 | Wednesday       | 440 (12.96%)   | 587 (14.49%)   |        |
| 16 |                 |                |                |        |
| 17 | Thursday        | 494 (14.55%)   | 590 (14.56%)   |        |
| 18 |                 |                |                |        |
| 19 | Friday          | 480 (14.14%)   | 613 (15.13%)   |        |
| 20 |                 |                |                |        |
| 21 | Saturday        | 504 (14.85%)   | 582 (14.36%)   |        |
| 22 |                 |                |                |        |
| 23 | Sunday          | 437 (12.87%)   | 483 (11.92%)   |        |
| 24 |                 |                |                |        |
| 25 |                 |                |                |        |
| 26 |                 |                |                |        |
| 27 |                 |                |                |        |

a

Mann-Whitney

test

Table 2. Demographic features and clinical outcome in DUI and non-DUI patients

|                      | DUI           | Non-DUI        | <i>p</i>            |
|----------------------|---------------|----------------|---------------------|
| Gender, n (%)        |               |                | <0.001              |
| Male                 | 568 (88.47%)  | 3,807 (55.94%) |                     |
| Female               | 74 (11.53%)   | 2,998 (44.06%) |                     |
| Age (years)          | 39.64 (12.76) | 44.07 (19.13)  | <0.001 <sup>a</sup> |
| Car, n (%)           |               |                | 0.020               |
| Airbag               | 25 (50.00%)   | 109 (68.13%)   |                     |
| No airbag            | 25 (50.00%)   | 51 (31.88%)    |                     |
| Motorcycle, n (%)    |               |                | <0.001              |
| Helmet               | 433 (73.14%)  | 6,003 (90.34%) |                     |
| No Helmet            | 159 (26.86%)  | 642 (9.66%)    |                     |
| ISS                  | 13 (14)       | 9 (7)          | <0.001 <sup>a</sup> |
| Hospital stay (days) | 8 (11)        | 6 (7)          | <0.001 <sup>a</sup> |
| Mortality, n (%)     |               |                | <0.001              |
| Alive                | 612 (95.33%)  | 6,735 (98.97%) |                     |
| Death                | 30 (4.67%)    | 70 (1.03%)     |                     |
| Seasons, n (%)       |               |                | 0.522               |
| Spring               | 135 (21.03%)  | 1,464 (21.51%) |                     |
| Summer               | 153 (23.83%)  | 1,729 (25.41%) |                     |
| Autumn               | 163 (25.39%)  | 1,769 (26.00%) |                     |
| Winter               | 191 (29.75%)  | 1,843 (27.08%) |                     |
| Time, n (%)          |               |                | <0.001              |
| 6AM - 2PM            | 70 (10.90%)   | 3,103 (45.60%) |                     |
| 2PM - 10PM           | 249 (38.79%)  | 2,795 (41.07%) |                     |
| 10PM - 6AM           | 323 (50.31%)  | 907 (13.33%)   |                     |

&lt;0.001

Weekdays, n (%)

|    |           |              |                |
|----|-----------|--------------|----------------|
| 1  |           |              |                |
| 2  | Monday    | 81 (12.62%)  | 1,045 (15.36%) |
| 3  |           |              |                |
| 4  | Tuesday   | 72 (11.21%)  | 1,039 (15.27%) |
| 5  |           |              |                |
| 6  | Wednesday | 85 (13.24%)  | 942 (13.84%)   |
| 7  |           |              |                |
| 8  | Thursday  | 79 (12.31%)  | 1,005 (14.77%) |
| 9  |           |              |                |
| 10 | Friday    | 81 (12.62%)  | 1,012 (14.87%) |
| 11 |           |              |                |
| 12 | Saturday  | 120 (18.69%) | 966 (14.20%)   |
| 13 |           |              |                |
| 14 | Sunday    | 124 (19.31%) | 796 (11.70%)   |
| 15 |           |              |                |
| 16 |           |              |                |
| 17 |           |              |                |

---

<sup>a</sup> Mann-Whitney test

For peer review only

Table 3. Homogeneity analysis of factors related to DUI before and after sanction

|                  | Before sanction |               |                    | After sanction |               |                     | Crude OR<br>(95% CI) | <i>p</i> |
|------------------|-----------------|---------------|--------------------|----------------|---------------|---------------------|----------------------|----------|
|                  | DUI             | Non-DUI       | OR (95% CI)        | DUI            | Non-DUI       | OR (95% CI)         |                      |          |
| Gender, n (%)    |                 |               |                    |                |               |                     |                      |          |
| Male             | 331 (9.75%)     | 1710 (50.37%) | 6.05 (4.35-8.40)   | 237 (5.85%)    | 2097 (51.75%) | 5.96 (4.09-8.66)    | 6.01 (4.69-7.69)     | 0.952    |
| Female           | 42 (1.24%)      | 1312 (38.65%) |                    | 32 (0.79%)     | 1686 (41.61%) |                     |                      |          |
| Mortality, n (%) |                 |               |                    |                |               |                     |                      |          |
| Alive            | 360 (10.60%)    | 2997 (88.28%) | 4.33 (2.20-8.54)   | 252 (6.22%)    | 3738 (92.25%) | 5.60 (3.16-9.93)    | 4.98 (3.21-7.73)     | 0.568    |
| Death            | 13 (0.38)       | 25 (0.74%)    |                    | 17 (0.42%)     | 45 (1.11%)    |                     |                      |          |
| Time, n (%)      |                 |               |                    |                |               |                     |                      |          |
| 6AM – 2PM        | 46 (12.33%)     | 1305 (43.18%) | 1                  | 24 (8.92%)     | 1798 (47.53%) | 1                   |                      | <0.001   |
| 2PM – 10PM       | 139 (37.27%)    | 1297 (42.92%) | 3.04 (2.16-4.28)   | 110 (40.89%)   | 1498 (39.60%) | 5.50 (3.52-8.60)    |                      |          |
| 10PM – 6AM       | 188 (50.40%)    | 420 (13.90%)  | 12.70 (9.03-17.85) | 135 (50.19%)   | 487 (12.87%)  | 20.76 (13.30-32.41) |                      |          |
| Car, n (%)       |                 |               |                    |                |               |                     |                      |          |
| Airbag           | 19 (59.38%)     | 54 (75.00%)   | 0.49 (0.20-1.18)   | 6 (33.33%)     | 55 (62.50%)   | 0.30 (0.10-0.88)    |                      | 0.007    |
| No airbag        | 13 (40.63%)     | 18 (25.00%)   |                    | 12 (66.67%)    | 33 (37.50%)   |                     |                      |          |

|    |                  |              |               |                  |              |               |                  |                  |
|----|------------------|--------------|---------------|------------------|--------------|---------------|------------------|------------------|
| 1  |                  |              |               |                  |              |               |                  |                  |
| 2  | Saturday         | 72 (19.30%)  | 432 (14.30%)  | 0.83 (0.58-1.18) | 48 (17.84%)  | 534 (14.12%)  | 0.76 (0.50-1.15) |                  |
| 3  |                  |              |               |                  |              |               |                  |                  |
| 4  | Motorcycle n (%) |              |               |                  |              |               |                  | <0.001           |
| 5  |                  |              |               |                  |              |               |                  |                  |
| 6  | Helmet           | 261 (76.54%) | 2615 (88.64%) | 0.42 (0.32-0.55) | 172 (68.53%) | 3388 (91.69%) | 0.20 (0.15-0.26) |                  |
| 7  |                  |              |               |                  |              |               |                  |                  |
| 8  | No Helmet        | 80 (23.46%)  | 335 (11.36%)  |                  | 79 (31.47%)  | 307 (8.31%)   |                  |                  |
| 9  |                  |              |               |                  |              |               |                  |                  |
| 10 |                  |              |               |                  |              |               |                  |                  |
| 11 | Seasons, n (%)   |              |               |                  |              |               |                  | 0.456            |
| 12 |                  |              |               |                  |              |               |                  |                  |
| 13 | Spring           | 63 (16.89%)  | 542 (17.94%)  | 1                | 72 (26.77%)  | 922 (24.37%)  | 1                |                  |
| 14 |                  |              |               |                  |              |               |                  |                  |
| 15 | Summer           | 98 (26.27%)  | 776 (25.68%)  | 1.09 (0.78-1.52) | 55 (20.45%)  | 953 (25.19%)  | 0.74 (0.51-1.06) | 0.96 (0.75-1.22) |
| 16 |                  |              |               |                  |              |               |                  |                  |
| 17 | Autumn           | 94 (25.20%)  | 876 (28.99%)  | 0.92 (0.66-1.29) | 69 (25.65%)  | 893 (23.61%)  | 0.99 (0.70-1.39) | 1.00 (0.79-1.27) |
| 18 |                  |              |               |                  |              |               |                  |                  |
| 19 | Winter           | 118 (31.64%) | 828 (27.40%)  | 1.23 (0.89-1.70) | 73 (27.14%)  | 1015 (26.83%) | 0.92 (0.66-1.29) | 1.12 (0.89-1.42) |
| 20 |                  |              |               |                  |              |               |                  |                  |
| 21 |                  |              |               |                  |              |               |                  |                  |
| 22 | Weekdays, n (%)  |              |               |                  |              |               |                  | <0.001           |
| 23 |                  |              |               |                  |              |               |                  |                  |
| 24 | Sunday           | 73 (19.57%)  | 364 (12.05%)  | 1                | 51 (18.96%)  | 432 (11.42%)  | 1                |                  |
| 25 |                  |              |               |                  |              |               |                  |                  |
| 26 | Monday           | 40 (10.72%)  | 447 (14.79%)  | 0.45 (0.30-0.67) | 41 (15.24%)  | 598 (15.81%)  | 0.58 (0.38-0.89) |                  |
| 27 |                  |              |               |                  |              |               |                  |                  |
| 28 | Tuesday          | 45 (12.06%)  | 508 (16.81%)  | 0.44 (0.30-0.66) | 27 (10.04%)  | 531 (14.04%)  | 0.43 (0.27-0.70) |                  |
| 29 |                  |              |               |                  |              |               |                  |                  |
| 30 | Wednesday        | 47 (12.60%)  | 393 (13.00%)  | 0.60 (0.40-0.88) | 38 (14.13%)  | 549 (14.51)   | 0.57 (0.38-0.91) |                  |
| 31 |                  |              |               |                  |              |               |                  |                  |
| 32 | Thursday         | 50 (13.40%)  | 444 (14.69%)  | 0.56 (0.38-0.83) | 29 (10.78%)  | 561 (14.83%)  | 0.44 (0.27-0.70) |                  |
| 33 |                  |              |               |                  |              |               |                  |                  |
| 34 | Friday           | 46 (12.33%)  | 434 (14.36%)  | 0.53 (0.36-0.78) | 35 (13.01%)  | 578 (15.28%)  | 0.51 (0.33-0.80) |                  |
| 35 |                  |              |               |                  |              |               |                  |                  |
| 36 |                  |              |               |                  |              |               |                  |                  |
| 37 |                  |              |               |                  |              |               |                  |                  |
| 38 |                  |              |               |                  |              |               |                  |                  |

<sup>a</sup> Breslow-Day statistic

Table 4. The distribution of Abbreviated Injury Scale (AIS) score in DUI/non-DUI patients

|           | DUI          | Non-DUI       | OR (95% CI)       | <i>p</i> |
|-----------|--------------|---------------|-------------------|----------|
| Head/Neck |              |               |                   | < 0.0001 |
| 0         | 269 (41.90%) | 4799 (70.52%) | 1                 |          |
| 1         | 94 (14.64%)  | 638 (9.38%)   | 2.63 (2.05-3.37)  |          |
| 2         | 22 (3.43%)   | 105 (1.54%)   | 3.74 (2.32-6.02)  |          |
| 3         | 81 (12.62%)  | 506 (7.44%)   | 2.86 (2.19-3.72)  |          |
| 4         | 131 (20.40%) | 597 (8.77%)   | 3.92 (3.12-4.91)  |          |
| 5-6       | 45 (7.01%)   | 1160 (2.35%)  | 0.69 (0.50-0.96)  |          |
| Face      |              |               |                   | < 0.0001 |
| 0         | 361 (56.23%) | 5342 (78.50%) | 1                 |          |
| 1         | 64 (9.97%)   | 493 (7.24%)   | 1.921 (1.45-2.55) |          |
| 2         | 215 (33.49%) | 949 (13.95%)  | 3.353 (2.79-4.02) |          |
| 3         | 2 (0.31%)    | 21 (0.31%)    | 1.409 (0.33-6.03) |          |
| Thorax    |              |               |                   | < 0.0001 |
| 0         | 488 (76.01%) | 5640 (82.88%) | 1                 |          |
| 1         | 31 (4.83%)   | 220 (3.23%)   | 1.63 (1.11-2.40)  |          |
| 2         | 27 (4.21%)   | 306 (4.50%)   | 1.02 (0.681-1.53) |          |
| 3         | 57 (8.88%)   | 437 (6.42%)   | 1.51 (1.13-2.02)  |          |
| 4         | 37 (5.76%)   | 196 (2.88%)   | 2.18 (1.52-3.14)  |          |
| 5-6       | 2 (0.32%)    | 6 (0.08%)     | 3.85 (0.78-19.14) |          |
| Abdomen   |              |               |                   | < 0.0001 |
| 0         | 552 (85.98%) | 6319 (92.86%) | 1                 |          |
| 1         | 7 (1.09%)    | 38 (0.56%)    | 2.109 (0.94-4.74) |          |
| 2         | 42 (6.54%)   | 222 (3.26%)   | 2.166 (1.57-3.05) |          |



|    |             |              |               |                   |          |
|----|-------------|--------------|---------------|-------------------|----------|
| 1  | 3           | 23 (3.58%)   | 141 (2.07%)   | 1.867 (1.19-2.93) |          |
| 2  | 4           | 13 (2.02%)   | 69 (1.01%)    | 2.157 (1.19-3.93) |          |
| 3  | 5           | 5 (0.78%)    | 16 (0.24%)    | 3.583 (1.31-9.81) |          |
| 4  |             |              |               |                   |          |
| 5  |             |              |               |                   |          |
| 6  |             |              |               |                   |          |
| 7  | Extremities |              |               |                   | < 0.0001 |
| 8  |             |              |               |                   |          |
| 9  | 0           | 261 (40.65%) | 1839 (29.02%) | 1                 |          |
| 10 |             |              |               |                   |          |
| 11 | 1           | 63 (9.81%)   | 435 (6.39%)   | 1.020 (0.76-1.37) |          |
| 12 |             |              |               |                   |          |
| 13 | 2           | 185 (28.82%) | 2973 (43.69%) | 0.438 (0.36-0.53) |          |
| 14 |             |              |               |                   |          |
| 15 |             |              |               |                   |          |
| 16 | 3-5         | 133 (20.72%) | 1558 (22.89%) | 0.61 (0.48-0.75)  |          |
| 17 |             |              |               |                   |          |
| 18 | External    |              |               |                   | 0.195    |
| 19 |             |              |               |                   |          |
| 20 |             |              |               |                   |          |
| 21 | 0           | 536 (83.49%) | 5799 (85.22%) | 1                 |          |
| 22 |             |              |               |                   |          |
| 23 | 1           | 102 (15.89%) | 981 (14.42%)  | 1.125 (0.90-1.41) |          |
| 24 |             |              |               |                   |          |
| 25 | 2           | 4 (0.62%)    | 25 (0.37%)    | 1.731 (0.60-4.99) |          |
| 26 |             |              |               |                   |          |
| 27 |             |              |               |                   |          |

### Figure legend

Figure 1. The monthly DUI patient number before and after sanction change.

Figure 2. DUI event density over the 71 district areas of southern Taiwan (A. before sanction change; B. after sanction change)



The monthly DUI patient number before (July 2009 to December 2012) and after (July 2013 to December 2016) sanction change with multivariate regression line

224x153mm (300 x 300 DPI)

1  
2  
3  
4  
5  
6  
7  
8  
9  
10  
11  
12  
13  
14  
15  
16  
17  
18  
19  
20  
21  
22  
23  
24  
25  
26  
27  
28  
29  
30  
31  
32  
33  
34  
35  
36  
37  
38  
39  
40  
41  
42  
43  
44  
45  
46  
47  
48  
49  
50  
51  
52  
53  
54  
55  
56  
57  
58  
59  
60

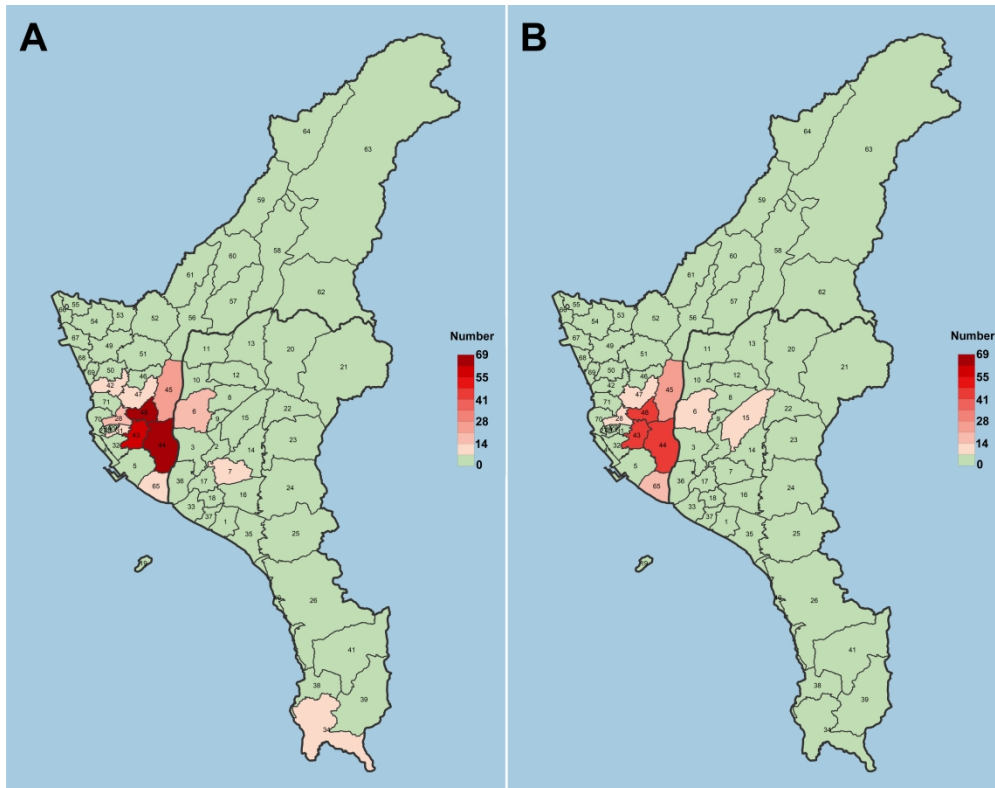

DUI event density over the 71 district areas of southern Taiwan (A. before sanction change; B. after sanction change)

350x273mm (300 x 300 DPI)

STROBE Statement—Checklist of items that should be included in reports of *cross-sectional studies*

|                              | Item No | Recommendation                                                                                                                                                                                               | Page No |
|------------------------------|---------|--------------------------------------------------------------------------------------------------------------------------------------------------------------------------------------------------------------|---------|
| <b>Title and abstract</b>    | 1       | (a) Indicate the study's design with a commonly used term in the title or the abstract                                                                                                                       | 2       |
|                              |         | (b) Provide in the abstract an informative and balanced summary of what was done and what was found                                                                                                          | 2       |
| <b>Introduction</b>          |         |                                                                                                                                                                                                              |         |
| Background/rationale         | 2       | Explain the scientific background and rationale for the investigation being reported                                                                                                                         | 4       |
| Objectives                   | 3       | State specific objectives, including any prespecified hypotheses                                                                                                                                             | 4       |
| <b>Methods</b>               |         |                                                                                                                                                                                                              |         |
| Study design                 | 4       | Present key elements of study design early in the paper                                                                                                                                                      | 6       |
| Setting                      | 5       | Describe the setting, locations, and relevant dates, including periods of recruitment, exposure, follow-up, and data collection                                                                              | 6       |
| Participants                 | 6       | (a) Give the eligibility criteria, and the sources and methods of selection of participants                                                                                                                  | 6       |
| Variables                    | 7       | Clearly define all outcomes, exposures, predictors, potential confounders, and effect modifiers. Give diagnostic criteria, if applicable                                                                     | 7       |
| Data sources/<br>measurement | 8*      | For each variable of interest, give sources of data and details of methods of assessment (measurement). Describe comparability of assessment methods if there is more than one group                         | 7       |
| Bias                         | 9       | Describe any efforts to address potential sources of bias                                                                                                                                                    | -       |
| Study size                   | 10      | Explain how the study size was arrived at                                                                                                                                                                    | 6       |
| Quantitative variables       | 11      | Explain how quantitative variables were handled in the analyses. If applicable, describe which groupings were chosen and why                                                                                 | 6       |
| Statistical methods          | 12      | (a) Describe all statistical methods, including those used to control for confounding                                                                                                                        | 7       |
|                              |         | (b) Describe any methods used to examine subgroups and interactions                                                                                                                                          | 7       |
|                              |         | (c) Explain how missing data were addressed                                                                                                                                                                  | 6       |
|                              |         | (d) If applicable, describe analytical methods taking account of sampling strategy                                                                                                                           | -       |
|                              |         | (e) Describe any sensitivity analyses                                                                                                                                                                        | 6       |
| <b>Results</b>               |         |                                                                                                                                                                                                              |         |
| Participants                 | 13*     | (a) Report numbers of individuals at each stage of study—eg numbers potentially eligible, examined for eligibility, confirmed eligible, included in the study, completing follow-up, and analysed            | 6       |
|                              |         | (b) Give reasons for non-participation at each stage                                                                                                                                                         | -       |
|                              |         | (c) Consider use of a flow diagram                                                                                                                                                                           | -       |
| Descriptive data             | 14*     | (a) Give characteristics of study participants (eg demographic, clinical, social) and information on exposures and potential confounders                                                                     | 8-10    |
|                              |         | (b) Indicate number of participants with missing data for each variable of interest                                                                                                                          | -       |
| Outcome data                 | 15*     | Report numbers of outcome events or summary measures                                                                                                                                                         | 8-10    |
| Main results                 | 16      | (a) Give unadjusted estimates and, if applicable, confounder-adjusted estimates and their precision (eg, 95% confidence interval). Make clear which confounders were adjusted for and why they were included | 8-10    |

|                          |    |                                                                                                                                                                            |       |
|--------------------------|----|----------------------------------------------------------------------------------------------------------------------------------------------------------------------------|-------|
|                          |    | (b) Report category boundaries when continuous variables were categorized                                                                                                  | -     |
|                          |    | (c) If relevant, consider translating estimates of relative risk into absolute risk for a meaningful time period                                                           | -     |
| Other analyses           | 17 | Report other analyses done—eg analyses of subgroups and interactions, and sensitivity analyses                                                                             | -     |
| <b>Discussion</b>        |    |                                                                                                                                                                            |       |
| Key results              | 18 | Summarise key results with reference to study objectives                                                                                                                   | 11    |
| Limitations              | 19 | Discuss limitations of the study, taking into account sources of potential bias or imprecision. Discuss both direction and magnitude of any potential bias                 | 13-14 |
| Interpretation           | 20 | Give a cautious overall interpretation of results considering objectives, limitations, multiplicity of analyses, results from similar studies, and other relevant evidence | 11    |
| Generalisability         | 21 | Discuss the generalisability (external validity) of the study results                                                                                                      | -     |
| <b>Other information</b> |    |                                                                                                                                                                            |       |
| Funding                  | 22 | Give the source of funding and the role of the funders for the present study and, if applicable, for the original study on which the present article is based              | 14    |

\*Give information separately for exposed and unexposed groups.

**Note:** An Explanation and Elaboration article discusses each checklist item and gives methodological background and published examples of transparent reporting. The STROBE checklist is best used in conjunction with this article (freely available on the Web sites of PLoS Medicine at <http://www.plosmedicine.org/>, Annals of Internal Medicine at <http://www.annals.org/>, and Epidemiology at <http://www.epidem.com/>). Information on the STROBE Initiative is available at [www.strobe-statement.org](http://www.strobe-statement.org).

# BMJ Open

## The effect of lowering the legal blood alcohol concentration limit on driving under the influence (DUI) in southern Taiwan – a cross-sectional retrospective analysis

|                                 |                                                                                                                                                                                                                                                                                                                                                                                                                                                                                                                                                                                                                                                                                                                                                                                                                                                                                                                                                                                                                                                                                                                     |
|---------------------------------|---------------------------------------------------------------------------------------------------------------------------------------------------------------------------------------------------------------------------------------------------------------------------------------------------------------------------------------------------------------------------------------------------------------------------------------------------------------------------------------------------------------------------------------------------------------------------------------------------------------------------------------------------------------------------------------------------------------------------------------------------------------------------------------------------------------------------------------------------------------------------------------------------------------------------------------------------------------------------------------------------------------------------------------------------------------------------------------------------------------------|
| Journal:                        | <i>BMJ Open</i>                                                                                                                                                                                                                                                                                                                                                                                                                                                                                                                                                                                                                                                                                                                                                                                                                                                                                                                                                                                                                                                                                                     |
| Manuscript ID                   | bmjopen-2018-026481.R2                                                                                                                                                                                                                                                                                                                                                                                                                                                                                                                                                                                                                                                                                                                                                                                                                                                                                                                                                                                                                                                                                              |
| Article Type:                   | Research                                                                                                                                                                                                                                                                                                                                                                                                                                                                                                                                                                                                                                                                                                                                                                                                                                                                                                                                                                                                                                                                                                            |
| Date Submitted by the Author:   | 25-Jan-2019                                                                                                                                                                                                                                                                                                                                                                                                                                                                                                                                                                                                                                                                                                                                                                                                                                                                                                                                                                                                                                                                                                         |
| Complete List of Authors:       | Tsai, Yu-Chin; Kaohsiung Chang Gung Memorial Hospital and Chang Gung University College of Medicine, Department of Neurosurgery<br>Wu, Shao-Chun; Kaohsiung Chang Gung Memorial Hospital and Chang Gung University College of Medicine, Department of Anesthesiology<br>Huang, Jin-Fu; Kaohsiung Chang Gung Memorial Hospital and Chang Gung University College of Medicine, Department of Neurosurgery<br>Kuo, Spencer C.H.; Kaohsiung Chang Gung Memorial Hospital and Chang Gung University College of Medicine, Department of Plastic Surgery<br>Rau, Cheng-Shyuan; Kaohsiung Chang Gung Memorial Hospital and Chang Gung University College of Medicine, Department of Neurosurgery<br>Chien, Peng-Chen; Kaohsiung Chang Gung Memorial Hospital and Chang Gung University College of Medicine, Department of Plastic Surgery<br>Hsieh, Hsiao-Yun; Kaohsiung Chang Gung Memorial Hospital and Chang Gung University College of Medicine, Department of Plastic Surgery<br>Hsieh, Ching-Hua; Kaohsiung Chang Gung Memorial Hospital and Chang Gung University College of Medicine, Department of Plastic Surgery |
| <b>Primary Subject Heading</b>: | Public health                                                                                                                                                                                                                                                                                                                                                                                                                                                                                                                                                                                                                                                                                                                                                                                                                                                                                                                                                                                                                                                                                                       |
| Secondary Subject Heading:      | Addiction, Epidemiology, Public health                                                                                                                                                                                                                                                                                                                                                                                                                                                                                                                                                                                                                                                                                                                                                                                                                                                                                                                                                                                                                                                                              |
| Keywords:                       | driving under the influence, alcohol, mortality, helmet use, airbag                                                                                                                                                                                                                                                                                                                                                                                                                                                                                                                                                                                                                                                                                                                                                                                                                                                                                                                                                                                                                                                 |
|                                 |                                                                                                                                                                                                                                                                                                                                                                                                                                                                                                                                                                                                                                                                                                                                                                                                                                                                                                                                                                                                                                                                                                                     |

SCHOLARONE™  
Manuscripts

1  
2  
3 **The effect of lowering the legal blood alcohol concentration limit on driving**  
4 **under the influence (DUI) in southern Taiwan – a cross-sectional retrospective**  
5 **analysis**  
6  
7  
8  
9

10 Yu-Chin Tsai<sup>1\*</sup>, MD., M.Sc.; Shao-Chun Wu<sup>2\*</sup>, MD.; Jin-Fu Huang<sup>1</sup>, MD.; Spencer  
11 C.H. Kuo<sup>3</sup>, M.D.; Cheng-Shyuan Rau<sup>1</sup>, M.D.; Peng-Chen Chien<sup>3</sup>, M.Sc. Hsiao-Yun  
12 Hsieh<sup>3</sup>, M.Sc.; Ching-Hua Hsieh<sup>3</sup>, M.D., PhD.  
13  
14  
15  
16  
17  
18

19 <sup>1</sup> Department of Neurosurgery, Kaohsiung Chang Gung Memorial Hospital and Chang  
20 Gung University College of Medicine, Taiwan  
21  
22

23 <sup>2</sup> Department of Anesthesiology, Kaohsiung Chang Gung Memorial Hospital and  
24 Chang Gung University College of Medicine, Taiwan  
25  
26  
27

28 <sup>3</sup> Department of Plastic Surgery, Kaohsiung Chang Gung Memorial Hospital and  
29 Chang Gung University College of Medicine, Taiwan  
30  
31  
32  
33

34  
35 Yu-Chin Tsai; e-mail: vagility@gmail.com  
36

37 Shao-Chun Wu; e-mail: shaochunwu@gmail.com  
38

39 Jin-Fu Huang; e-mail: stillloop@gmail.com  
40

41 Spencer C.H. Kuo; e-mail: spenc19900603@gmail.com  
42

43 Cheng-Shyuan Rau; e-mail: ersh2127@cloud.cgmh.org.tw  
44

45 Peng-Chen Chien; e-mail: VENU\_CHIEN@hotmail.com  
46

47 Hsiao-Yun Hsieh; e-mail: sylvia19870714@hotmail.com  
48

49 Ching-Hua Hsieh; e-mail: m93chinghua@gmail.com  
50  
51  
52  
53

54  
55  
56 \*indicated equal contribution to the authorship by Y.-C.T. & S.-C.W.  
57

58 Corresponding author: Ching-Hua Hsieh, M.D., PhD., FACS.  
59  
60

1  
2  
3 Department of Plastic Surgery, Kaohsiung Chang Gung Memorial Hospital and  
4  
5 Chang Gung University College of Medicine, Taiwan  
6

7 No.123, Ta-Pei Road, Niao-Song District, Kaohsiung City 833, Taiwan

8  
9  
10 Tel: 886-7-3454746; E-mail: m93chinghua@gmail.com  
11  
12  
13

#### 14 15 **ABSTRACT**

16  
17 **Objectives:** We aimed to profile the epidemiological changes of driving under the  
18  
19 influence (DUI) in southern Taiwan after the legal blood alcohol concentration (BAC)  
20  
21 limit was lowered from 50 to 30 mg/dL in 2013.  
22  
23

24 **Setting:** Level 1 trauma medical center in southern Taiwan.

25  
26 **Participants:** Data from 7,447 patients (4,375 males and 3,072 females) were  
27  
28 retrieved from the Trauma Registry System of a single trauma center to examine  
29  
30 patient characteristics (gender, age, and BAC), clinical outcome variables  
31  
32 (Abbreviated Injury Score (AIS), Injury Severity Score (ISS), and mortality), and  
33  
34 vehicular crash-related factors (vehicle type, airbag use in car crashes, helmet use in  
35  
36 motorcycle crashes, and time of crash) before and after the BAC limit change.  
37  
38

39  
40 **Results:** Our results indicated that the percentage of DUI patients significantly  
41  
42 declined from 10.99% (n=373) to 6.64% (n=269) after the BAC limit was lowered.  
43  
44 Airbag use in car crashes (OR: 0.30, 95% CI: 0.10-0.88, p=0.007) and helmet use in  
45  
46 motorcycle crashes (OR: 0.20, 95% CI: 0.15-0.26, p <0.001) was lower in DUI  
47  
48 patients compared to non-DUI patients after the BAC limit change, with significant  
49  
50 negative correlation. DUI behavior increased crash mortality risk before the BAC  
51  
52 limit change (OR: 4.33, 95% CI: 2.20-8.54), and even more so after (OR: 5.60, 95%  
53  
54 CI: 3.16-9.93). The difference in ORs for mortality before and after the change in the  
55  
56 BAC legal limit was not significant (p = 0.568).  
57  
58  
59  
60



1  
2  
3 **Conclusion:** This study revealed that lowering the BAC limit to 30 mg/dL  
4 significantly reduced the number of DUI events, but failed to result in a significant  
5 reduction in mortality in these trauma patients.  
6  
7  
8

9  
10 **Keywords** driving under the influence; alcohol; mortality; helmet use; airbag  
11  
12

### 13 14 **Strengths and limitations of this study**

- 15  
16  
17 1. This study revealed that, with the legal blood alcohol concentration limit lowered  
18 from 50 to 30 mg/dL, the percentage of patients driving under the influence of  
19 alcohol declined, the percentage of airbag use in car crashes decreased, while  
20 helmet use in motorcycle crashes increased.  
21  
22  
23  
24  
25  
26 2. However, lowering the legal blood alcohol concentration limit from 50 to 30  
27 mg/dL did not significantly reduce the odds of mortality.  
28  
29  
30  
31 3. This study was limited by its retrospective design and data collection from one  
32 level I regional trauma center.  
33  
34  
35  
36  
37  
38  
39  
40  
41  
42  
43  
44  
45  
46  
47  
48  
49  
50  
51  
52  
53  
54  
55  
56  
57  
58  
59  
60

## INTRODUCTION

According to the World Health Organization (WHO), over 1.2 million people die each year in road traffic crashes, with 75% of the fatalities occurring in men in the economically active age range <sup>1</sup>. It is estimated that over 90% of road traffic deaths occur in low-income and middle-income countries, causing significant GDP losses of up to 5% <sup>2</sup>. Driving under the influence (DUI) of alcohol increases the risk of crash as well as the severity of crash-related injuries, and results in longer hospital stays, higher healthcare costs, and poorer outcomes compared to drivers in non-DUI-related crashes <sup>3-6</sup>. In particular, when the driver's blood alcohol concentration (BAC) exceeds 50 mg/dL, the risk and severity of traffic crashes increase remarkably <sup>7-10</sup>. Efforts to reduce alcohol-impaired driving have included implementing laws regarding minimum legal drinking age and BAC limit when driving, taxation of alcohol, providing alcohol education, and establishing alcohol treatment programs <sup>11</sup>.

Over the past decade (2007-2016), DUI-related traffic crashes have caused over 3000 deaths and approximately 110,000 injuries in Taiwan <sup>12</sup>. Nevertheless, prior to April 1999, DUI was not deemed a serious crime in Taiwan: it was legal to drive with BAC of 50 mg/dL; drivers with BAC between 50 and 110 mg/dL violated Road Traffic Security Rules and faced license suspension or revocation, or a financial penalty; drivers with BAC >110 mg/dL violated Article 185 of the Criminal Law, but would only face imprisonment of less than a year and fines of less than 30,000 New Taiwan Dollars (NTD) (~1,000 US dollars). In more recent years, DUI has received increased media attention, as alcohol-impaired traffic crashes are frequently reported. A series of amendments were made to the Road Traffic Management and Penalty Act,

1  
2  
3 Road Traffic Security Rules, and Article 185 of the Criminal Law <sup>13</sup>, including the  
4  
5 most recent amendment to Road Traffic Security Rules in 2013, which lowered the  
6  
7 legal BAC limit from 50 mg/dL to 30 mg/dL. In addition, financial penalties were  
8  
9 increased by up to 50%. According to national statistics, alcohol-impaired driving  
10  
11 casualties reduced after these regulation and law changes <sup>13</sup>. However, data on  
12  
13 monthly injuries and deaths resulting from DUI-related crashes and number of  
14  
15 monthly DUI violations are obtained from sobriety checkpoints by the police, and  
16  
17 specific data regarding the impact of DUI on medical service utilization after change  
18  
19 in the legal BAC limit are not available. Therefore, we aimed to compare the  
20  
21 epidemiological profile of DUI in southern Taiwan before and after the 2013 change  
22  
23 in legal BAC limit using data from the Trauma Registry System. We examined patient  
24  
25 demographics and outcomes, DUI status, crash-related factors, as well as outcomes  
26  
27 before and after the limit change to define the prognosis and risk factors for  
28  
29 DUI-related injury and mortality, and assess the effect of BAC limit change on these  
30  
31 factors.  
32  
33  
34  
35  
36  
37  
38  
39  
40  
41  
42  
43  
44  
45  
46  
47  
48  
49  
50  
51  
52  
53  
54  
55  
56  
57  
58  
59  
60

## PATIENTS AND METHODS

### Patient and Public Involvement.

The patients and the public were not involved in this study.

We retrospectively collected patient data from the Trauma Registry System of the Kaohsiung Chang Gung Memorial Hospital, a 2686-bed Level I regional trauma center that provides emergent care to trauma patients primarily from southern Taiwan<sup>14,15</sup>. Only drivers in car and motorcycle crashes that occurred in the Kaohsiung and Pingtung areas of Taiwan who were hospitalized between July 2009 and December 2016 were included. Twenty-three patients with incomplete data were excluded, as well as those whose hospital visit took place between January 2013 and June 2013, the period when amendments to the Road Traffic Management and Penalty Act were announced and implemented. This study was approved by the institutional review board (IRB) of the Kaohsiung Chang Gung Memorial Hospital (reference number 201701844B0). Data from 7,447 patients were used for the analysis.

BAC tests were routinely ordered for patients in the emergency room (ER) with clinical suspicion of DUI. Patients with BAC >30 mg/dL (the threshold for DUI after January 2013) were categorized into two groups according to when their visit took place: before BAC limit change (July 2009 to December 2012; n=3,395 patients), and after BAC limit change (July 2013 to December 2016; n=4,052 patients).. Detailed patient information was recorded and included the following variables: age, gender, type of vehicle crash, time and location of crash, airbag use (car crashes only), helmet use (motorcycle crashes only), BAC, hospital length of stay (LOS), in-hospital mortality, and crash-related trauma by body region. The Abbreviated Injury Score

(AIS) was used to evaluate injury severity in the following regions: head/neck, face, chest, abdomen, extremities (including pelvis), and external. Patients with higher AIS were combined for analysis in some regional subgroups due to inadequate patient numbers. The Injury Severity Score (ISS) was calculated by summing the square of the three highest AIS scores in each region <sup>16</sup>.

Patient characteristics, clinical outcome variables, and vehicular crash-related factors, were compared before and after the BAC limit change using the Chi-square test, Student's *t*-test and Mann-Whiney U-test. Differences in characteristics between patients in DUI (BAC  $\geq 30$  mg/dL) and non-DUI groups were also examined. Parameters were presented as numbers (percentage), median  $\pm$  interquartile range (IQR), or mean  $\pm$  standard deviation (SD). Logistic regression was used to define changes in baseline traits and clinical outcomes in the DUI and non-DUI groups before and after the BAC limit change. Breslow-Day statistics testing was performed to examine homogeneity in different stratifications. We also analyzed the ratio of single-vehicle nighttime (SVN) crashes to multiple-vehicle daytime (MVD) crashes as a proxy measure used in many studies for alcohol involvement <sup>17,18</sup>. R Statistical Software (Version 3.3.3) was used to geographically present the change in DUI event density in southern Taiwan, and demonstrate the monthly trend in the number of DUI patients from 2009 to 2016. All other analyses were performed using SAS software (Version 9.4). Statistical significance was defined as  $p < 0.05$ .

## RESULTS

The average age at the time of crash was  $43.68 \pm 18.70$  (range: 11-90 years). Of these patients, 642 (8.6%) were classified as DUI (BAC  $\geq 30$  mg/dL). Most crashes

1  
2  
3 were with a motorcycle vehicle (7,237 patients; 97.2%), and occurred between 6 AM  
4 – 2 PM (3,173 patients; 42.6%). Motorcyclists were wearing a helmet at the time of  
5 the crash in 88.93% (n = 7,237) of the patients, whereas 63.81% (n = 134) of car  
6 drivers had airbag protection. The average mortality was 1.34%, and median hospital  
7 LOS was six days.  
8  
9  
10  
11  
12  
13  
14  
15  
16

17 As shown in Table 1, 3,395 patients were admitted to our hospital before the  
18 BAC limit change, and 4,052 patients after. In both time periods, patients tended to be  
19 males between the ages of 40-45. The percentage of DUI patients significantly  
20 declined from 10.99% (n = 373) to 6.64% (n = 269) after the BAC limit change  
21 (Figure 1), and the average BAC at admission decreased from 21.19 mg/dL to 12.31  
22 mg/dL. This trend was observed across different regions in southern Taiwan, as  
23 shown in Figure 2. The percentage of airbag use in car crashes decreased, while  
24 helmet use in motorcycle crashes increased. No significant changes in mortality and  
25 hospital stay were found in our analyses. Patient numbers did not vary by season or  
26 day of the week, although a slight decrease was observed in the spring before the  
27 BAC limit change.  
28  
29  
30  
31  
32  
33  
34  
35  
36  
37  
38  
39  
40  
41  
42  
43  
44

45 Examination of patient characteristics, crash-related factors, and clinical  
46 outcomes in DUI and non-DUI patients revealed that patients in the DUI group were  
47 mostly male (88.47%) compared to the non-DUI group (55.94%) (Table 2). Patients  
48 in the DUI group were significantly younger (p <0.001). Reduced use of airbags in  
49 car crashes and helmets in motorcycle crashes were found in higher proportion in the  
50 DUI group than in the non-DUI group. DUI patients tended to have significantly  
51 higher ISS (13 vs. 9, p <0.001) and longer hospital stay (8 days vs. 6 days, p <0.001)  
52  
53  
54  
55  
56  
57  
58  
59  
60

1  
2  
3 than non-DUI patients. A significantly higher mortality rate was found in DUI  
4 patients than in non-DUI (4.67% vs. 1.03%,  $p < 0.001$ ). No significant seasonal  
5 differences were found between the groups. Time of visit to the ER differed for the  
6 DUI patients compared to the non-DUI patients. Most DUI patients visited the ER  
7 between 10 PM and 6 AM (50.31%), while only 13.33% of non-DUI patients visited  
8 at this time. Additionally, DUI crashes tended to occur on weekends (18.69% on  
9 Saturday and 19.31% on Sunday).

20  
21 Table 3 compares odds ratios (OR) for different stratified parameters before and  
22 after the BAC limit change. Males still showed increased odds of DUI (Crude OR:  
23 6.01, 95% CI: 4.69-7.69), but the BAC limit change showed no significant effect on  
24 DUI behavior between genders. DUI behavior increased the crash mortality risk  
25 before the BAC limit change, (OR: 4.33, 95% CI: 2.20-8.54), and even more so after  
26 (OR: 5.60, 95% CI: 3.16-9.93). The difference in these ORs was not significant ( $p =$   
27 0.568). Regarding time of crash, a greater number of DUI patients appeared between  
28 10 PM and 6 AM (OR 12.70) than between 2 PM and 10 PM (3.04) and between 6  
29 AM and 2 PM (baseline). This trend was significantly increased after the BAC limit  
30 change, which showed ORs of 20.76 and 5.50, respectively. There was no significant  
31 correlation between airbag use and DUI behavior in car crashes (OR 0.49, 95% CI:  
32 0.20-1.18) before the change in BAC limit. However, car crashes with airbag use  
33 were less frequent in DUI patients than in non-DUI patients after the BAC limit  
34 change (OR: 0.30, 95% CI: 0.10-0.88), with a significantly negative correlation.  
35 Similar results were found in motorcycle crashes. Helmet use in motorcycle crashes  
36 was a protective factor with a negative correlation to DUI behavior. This negative  
37 correlation was reinforced by the change in BAC limit. The OR of helmet use and  
38  
39  
40  
41  
42  
43  
44  
45  
46  
47  
48  
49  
50  
51  
52  
53  
54  
55  
56  
57  
58  
59  
60

1  
2  
3 DUI was 0.42 (95% CI: 0.32-0.55) before the change and 0.30 (95% CI: 0.15-0.26)  
4  
5 after, with significant difference between them ( $p < 0.001$ ). Season of crash had no  
6  
7 effect on DUI behavior either before or after the BAC limit change. Workdays were  
8  
9 significantly negatively correlated with DUI behavior as compared to weekends  
10  
11 (Saturday and Sunday) both before and after BAC limit change. In addition, the  
12  
13 SVN/MVD ratio significantly dropped to 0.48 from 0.60 after the change in BAC  
14  
15 limit was implemented, indicating that the change had the effect of reducing DUI  
16  
17 behavior.  
18  
19  
20  
21  
22  
23

24 The AIS of different regions were examined in DUI and non-DUI patients, and  
25  
26 indicated that DUI patients were more likely to sustain injuries to the head and neck,  
27  
28 face, thorax, and abdomen than non-DUI patients (Table 4). No significant difference  
29  
30 was found in external injuries between DUI and non-DUI patients. However, patients  
31  
32 with DUI were less likely than non-DUI patients to suffer from severe injury to the  
33  
34 extremities.  
35  
36  
37  
38  
39  
40  
41  
42  
43  
44  
45  
46  
47  
48  
49  
50  
51  
52  
53  
54  
55  
56  
57  
58  
59  
60



## DISCUSSION

Our analyses presented various factors associated with DUI behavior, including gender, mortality, time of day and day of week of the crash, use of airbags in cars, and use of helmets in motorcyclists. In this study, females accounted for a minor proportion (12%) of DUI patients, consistent with previous research<sup>19</sup>. Complex causal relationships in physiological and social factors may account for the difference in males and females involved in DUI. Our previous studies also reported more males than females with vehicular crashes sent to our emergency room<sup>14,20</sup>. Compared to females, males had a higher risk of motorcycle crashes<sup>21,22</sup>, which accounted for approximately 60% of injuries in southern Taiwan<sup>14,20</sup>. Male/female differences in alcoholic liver injury<sup>23</sup>, alcohol-induced brain injury<sup>24</sup>, and alcohol-related behavioral and medical problems have also been reported<sup>25-27</sup>. Increased vehicle performance and a higher number of safety features lead to greater risk-taking behavior by the driver<sup>28</sup>, and our results indicated that drivers using airbags in their vehicles show a significantly lower OR of being in a DUI crash. Although the decreased use of airbags may be due to the fact that DUI drivers tend to drive older vehicles, not wear a safety belt, and drive over the speed limit, this finding could indicate a relationship between the value placed on safety (e.g., purchase cars with more safety features) and the avoidance of risk-taking behaviors such as DUI. Our study also examined helmet use in motorcyclists, which has been mandatory for motorcyclists in Taiwan since June 1997; helmets were used by 90% of patients driving a motorcycle in this study. Previous studies have reported helmet use to be a protective factor or strong predictor of motorcycle crashes<sup>21,29-31</sup>. Our study also found that helmet use plays a significantly protective role in DUI crashes, supporting findings from Ohio, USA and Iran that suggest that motorcyclists involved in

1  
2  
3 alcohol-involved crashes are significantly less likely to wear a helmet <sup>32,33</sup>. The  
4  
5 decreased helmet use rate in our data may have contributed to the higher mortality  
6  
7 that we saw in DUI motorcycle drivers after the legal BAC limit was lowered to 30  
8  
9 mg/dL.  
10  
11  
12  
13

14  
15 Our analysis is consistent with findings in Taiwan based on national statistics <sup>13</sup>  
16  
17 that report a significant reduction in DUI events after the BAC limit change. Previous  
18  
19 studies report reductions in both crashes and fatalities when legal limits for BAC are  
20  
21 lowered to 50 mg/dL <sup>34,35</sup>. A significant decrease of 3.7% (95% CI: 0.9–6.5%) in  
22  
23 fatally injured drivers with a BAC level equal to or greater than 50 mg/dL was found  
24  
25 following the change <sup>36</sup>. A recent meta-analysis examined the impact of lowering the  
26  
27 legal BAC limit to 50 mg/dL, and found an 11.1% decrease in rates of fatal  
28  
29 alcohol-related crashes <sup>37</sup>. In this study, the proportion of male and female DUI  
30  
31 patients and overall mortality rate did not change after the legal limit change.  
32  
33 However, while the proportion of males and females did not change, other elements in  
34  
35 patient characteristics changed in our study after the legal BAC was lowered to 30  
36  
37 mg/dL: the percentage of DUI patients significantly decreased from 10.99% to 6.6%  
38  
39 and average BAC at admission decreased from 21.19 mg/dL to 12.31 mg/dL. The  
40  
41 decline in DUI events can be seen in the different geographical regions of Kaohsiung  
42  
43 and Pingtung surrounding our hospital. Time of injury appears to play a role in  
44  
45 severity of injury. It has been reported that drivers not under the influence of alcohol  
46  
47 suffer more severe injuries between midnight and early morning compared to early  
48  
49 night-time <sup>38</sup>. Findings from other studies have indicated that injuries involving  
50  
51 alcohol-intoxicated drivers are influenced less by geographic and environmental  
52  
53 factors than by the nature of collision and time of crash <sup>39</sup>. Our results indicate  
54  
55  
56  
57  
58  
59  
60

1  
2  
3 different temporal distribution (in weekday and time of day, but not in seasons) in the  
4  
5  
6  
7  
8  
9  
10  
11  
12  
13  
14  
15  
16  
17  
18  
19  
20  
21  
22  
23  
24  
25  
26  
27  
28  
29  
30  
31  
32  
33  
34  
35  
36  
37  
38  
39  
40  
41  
42  
43  
44  
45  
46  
47  
48  
49  
50  
51  
52  
53  
54  
55  
56  
57  
58  
59  
60

different temporal distribution (in weekday and time of day, but not in seasons) in the DUI and non-DUI groups. Most non-DUI patients visited the ER between early morning and afternoon (6 AM – 2 PM), but DUI patients tend to search for medical aid between 10 PM to 6 AM (50.31%). A previous study in Hong Kong indicated a similar temporal pattern in DUI using a slightly different time framework <sup>40</sup>. This study found that most DUI events occurred between 3 PM – 11 PM (39.5%) and 11 PM - 7 AM (29.8%). Consistent with our findings, a higher prevalence of DUI on weekends than on weekdays is reported in other studies <sup>41</sup>. In addition, the significant drop in SVN/MVD ratio after the legal BAC limit was lowered indicated that the limit change had an effect on the reduction in DUI behavior.

Although our study found that DUI events significantly decreased after the legal BAC limit was lowered, the increased point estimate for OR of DUI on mortality was not significant. Moreover, in DUI patients, the post-limit change mortality OR was significantly higher than pre-limit change. This may be explained by the possibility that DUI drivers after the change were more addicted to alcohol and had a lower helmet use rate. Studies have shown that alcohol impairs driving ability, and that the intoxicated driver is more likely to cause fatal road traffic crashes <sup>42</sup>, while other research has found the risk of mortality is not higher in patients with positive BAC <sup>3</sup>. Some studies have found that serum ethanol is independently associated with increased mortality <sup>43,44</sup>. Furthermore, some studies have proposed alcohol use can have a protective effect in trauma patients <sup>3,45,46</sup>. In this study, we did not find a protective role for DUI in our analysis of the association between DUI and AIS. These findings indicated that lowering the legal BAC limit can reduce alcohol-impaired driving <sup>47,48</sup>, but may be not enough to result in a significant

1  
2  
3 reduction in mortality of those trauma patients. This may indicate that other  
4 preventative policies, such as taxes on alcohol, minimum legal drinking ages, and  
5 administrative license revocation, should be considered <sup>49</sup>. In fact, drivers with or  
6 without DUI had more heterogeneity in the factors that may affect injury severity <sup>50</sup>.  
7  
8 Bias may exist in the analysis with multivariate logistic regression for the association  
9 between the injury severity and the drivers with or without DUI, which may comprise  
10 a limitation in this study.  
11  
12  
13  
14  
15  
16  
17  
18  
19  
20  
21

22 There are some other limitations to our study. First, the analysis was based on  
23 data from the trauma registry system of a level I regional trauma center in southern  
24 Taiwan. These results may not be externally valid. Besides, our selected statistical  
25 methods with limited parameters may not clarify the contributing factors and  
26 outcomes of DUI crashes due to its complex interaction <sup>51</sup>. Second, there were  
27 differences in the baseline characteristics of patients admitted after traffic crashes  
28 before and after sanction change. The differences in baseline characteristics may have  
29 confounded results and observed differences may have implied the effect of sanction  
30 change. Third, the combined use of psychoactive medication and alcohol may  
31 increase the risk of having a crash <sup>52,53</sup>. This confounder was not controlled in our  
32 study, although this bias is random. Fourth, patients seeking medical care due to a  
33 traffic crash did not routinely receive a blood alcohol test unless they showed  
34 symptoms of being alcohol-impaired or unconsciousness. This may underestimate the  
35 effect of DUI in our analysis. Fifth, our registry system is not able to report exact time  
36 elapsed from injury to an alcohol test. However, the mean transport time for the  
37 patients transported by emergency medical service to the hospital was  $18.3 \pm 7.9$  min  
38 according to our data and approximately 12 min according to Taiwan government  
39  
40  
41  
42  
43  
44  
45  
46  
47  
48  
49  
50  
51  
52  
53  
54  
55  
56  
57  
58  
59  
60

1  
2  
3 data from January 2009 to June 2009. Thus, the bias may be minimal. In addition,  
4 driver use of safety belt was not registered in the trauma database, so we could not  
5 investigate this important variable. Furthermore, our registry system did not exclude  
6 the repeated DUI patients; although these drivers may be a small group in our study  
7 subjects, they may confound our statistical results. Finally, there may exist bias in the  
8 outcome assessment with control of alcohol consumption, vehicle miles travelled, and  
9 vehicles and motorcycles registered, which were lacking in the registered trauma  
10 database.  
11  
12  
13  
14  
15  
16  
17  
18  
19  
20  
21  
22  
23

## 24 **CONCLUSION**

25  
26 This study revealed that lowering the legal limit for BAC to 30 mg/dL  
27 significantly reduced DUI events, but failed to result in a significant reduction in  
28 traffic crash mortality. Airbag use in car crashes and helmet use in motorcycle crashes  
29 after the limit change was less in DUI patients than in non-DUI patients, with  
30 significant negative correlation.  
31  
32  
33  
34  
35  
36  
37  
38  
39

## 40 **ACKNOWLEDGEMENTS**

41  
42 We thank the Biostatistics Center at the Kaohsiung Chang Gung Memorial Hospital  
43 for their help with the statistical analysis.  
44  
45  
46  
47  
48

## 49 **FUNDING**

50  
51 This research was supported by a grant from Chang Gung Memorial Hospital  
52 CGRPG8F0011.  
53  
54  
55  
56  
57

## 58 **AUTHOR CONTRIBUTIONS**

1  
2  
3 Y.-C.T. wrote the manuscript, S.-C.W. revised the manuscript, J.-F.H. assisted with  
4 the study design, S.C.H. K. was involved in the literature review, C.-S.R. was  
5 responsible for the integrity of registered data, P.-C.C performed the statistical  
6 analyses and edited the tables, H.-Y.H. proofread the manuscript, and C.-H.H.  
7 designed the study and contributed to the data analysis and interpretation. All authors  
8 read and approved the final manuscript.  
9  
10  
11  
12  
13  
14  
15  
16  
17  
18

### 19 **CONFLICTS OF INTEREST**

20  
21 The authors declare no conflict of interest.  
22  
23  
24  
25

### 26 **DATA SHARING**

27  
28 No additional data are available.  
29  
30  
31  
32

### 33 **REFERENCES**

- 34  
35 1. World Health Organization. Global status report on road safety. 2015.  
36  
37 2. World Health Organization. World report on road traffic injury prevention. 2004.  
38  
39 3. Hsieh CH, Su LT, Wang YC, et al. Does alcohol intoxication protect patients  
40 from severe injury and reduce hospital mortality? The association of alcohol  
41 consumption with the severity of injury and survival in trauma patients. *Am Surg.*  
42 2013;79(12):1289-1294.  
43  
44 4. Lee MH, Mello MJ, Reinert S. Emergency department charges for evaluating  
45 minimally injured alcohol-impaired drivers. *Ann Emerg Med.*  
46 2009;54(4):593-599.  
47  
48 5. Martin TL, Solbeck PA, Mayers DJ, et al. A review of alcohol-impaired driving:  
49 the role of blood alcohol concentration and complexity of the driving task. *J*  
50  
51  
52  
53  
54  
55  
56  
57  
58  
59  
60

- 1  
2  
3 *Forensic Sci.* 2013;58(5):1238-1250.  
4  
5  
6 6. O'Keeffe T, Rhee P, Shafi S, et al. Alcohol use increases diagnostic testing,  
7  
8 procedures, charges, and the risk of hospital admission: a population-based study  
9  
10 of injured patients in the emergency department. *Am J Surg.* 2013;206(1):16-22.  
11  
12  
13 7. Blomberg RD, Peck RC, Moskowitz H, et al. The Long Beach/Fort Lauderdale  
14  
15 relative risk study. *J Safety Res.* 2009;40(4):285-292.  
16  
17  
18 8. Fell JC, Voas RB. The effectiveness of a 0.05 blood alcohol concentration (BAC)  
19  
20 limit for driving in the United States. *Addiction.* 2014;109(6):869-874.  
21  
22  
23 9. Taylor B, Irving HM, Kanteres F, et al. The more you drink, the harder you fall: a  
24  
25 systematic review and meta-analysis of how acute alcohol consumption and  
26  
27 injury or collision risk increase together. *Drug Alcohol Depend.*  
28  
29 2010;110(1-2):108-116.  
30  
31  
32 10. Taylor B, Rehm J. The relationship between alcohol consumption and fatal motor  
33  
34 vehicle injury: high risk at low alcohol levels. *Alcohol Clin Exp Res.*  
35  
36 2012;36(10):1827-1834.  
37  
38  
39 11. Thomas F. Babor. Alcohol: no ordinary commodity--a summary of the second  
40  
41 edition. *Addiction.* 2010;105(5):769-779.  
42  
43  
44 12. Ministry of Interior ROCM. Statistics of Police Administration. 2018.  
45  
46  
47 13. Chan YS, Chen CS, Huang L, Peng YI. Sanction changes and drunk-driving  
48  
49 injuries/deaths in Taiwan. *Accid Anal Prev.* 2017;107(10):102-109.  
50  
51  
52 14. Hsieh CH, Hsu SY, Hsieh HY, Chen YC. Differences between the sexes in  
53  
54 motorcycle-related injuries and fatalities at a Taiwanese level I trauma center.  
55  
56 *Biomed J.* 2017;40(2):113-120.  
57  
58  
59 15. Hsieh CH, Liu HT, Hsu SY, et al. Motorcycle-related hospitalizations of the  
60  
elderly. *Biomed J.* 2017;40(2):121-128.

- 1  
2  
3 16. Hsieh CH, Chen YC, Hsu SY, et al. Defining polytrauma by abbreviated injury  
4 scale  $\geq 3$  for a least two body regions is insufficient in terms of short-term  
5  
6 outcome: A cross-sectional study at a level I trauma center. *Biomed J.*  
7  
8 2018;41(5):321-327.  
9
- 10  
11  
12 17. Voas RB, Romano E, Peck R. Validity of surrogate measures of alcohol  
13 involvement when applied to nonfatal crashes. *Accid Anal Prev.*  
14  
15 2009;41(3):522-530.  
16
- 17  
18  
19 18. Heeren T, Smith RA, Morelock S, Hingson RW. Surrogate measures of alcohol  
20 involvement in fatal crashes: Are conventional indicators adequate? *J Safety Res.*  
21  
22 1985;16(3):127-133.  
23
- 24  
25  
26 19. Maxwell JC, Freeman J. Gender differences in DUI offenders in treatment in  
27 Texas. *Traffic Inj Prev.* 2007;8(4):353-360.  
28
- 29  
30  
31 20. Tang CE, Liu HT, Kuo PJ, et al. Impact of Sexual Dimorphism on Trauma  
32 Patterns and Clinical Outcomes of Patients with a High-Risk Score of the  
33 Osteoporosis Self-Assessment Tool for Asians: A Propensity Score-Matched  
34  
35 Analysis. *Int J Environ Res Public Health.* 2018;15(3): E418.  
36  
37
- 38  
39  
40 21. Apidechkul T, Laingoen O, Suwannaporn S, Tamornpark R. Factors Influencing  
41 Motorcycle Accidents among Hill Tribe Youths in Chiang Rai, Thailand. *Thai J*  
42  
43 *Health Res.* 2017;31(6):473-480.  
44  
45
- 46  
47 22. Mbanjumucyo G, George N, Kearney A, et al. Epidemiology of injuries and  
48 outcomes among trauma patients receiving prehospital care at a tertiary teaching  
49  
50 hospital in Kigali, Rwanda. *Afr J Emerg Med.* 2016;6(4):191-197.  
51
- 52  
53  
54 23. Eagon PK. Alcoholic liver injury: Influence of gender and hormones. *World J*  
55  
56 *Gastroenterol.* 2010;16(11):1377.  
57
- 58  
59 24. Hommer DW. Male and female sensitivity to alcohol-induced brain damage.  
60



- 1  
2  
3 *Alcohol Res Health.* 2003;27(2):181-185.  
4  
5  
6 25. Bradley KA, Badrinath S, Bush K, et al. Medical risks for women who drink  
7 alcohol. *J Gen Intern Med.* 1998;13(9):627-639.  
8  
9  
10 26. Nolen-Hoeksema S. Gender differences in risk factors and consequences for  
11 alcohol use and problems. *Clin Psychol Rev.* 2004;24(8):981-1010.  
12  
13  
14 27. Nolen-Hoeksema S, Hilt L. Possible contributors to the gender differences in  
15 alcohol use and problems. *J Gen Psychol.* 2006;133(4):357-374.  
16  
17  
18 28. Horswill MS, Coster ME. The effect of vehicle characteristics on drivers'  
19 risk-taking behaviour. *Ergonomics.* 2002;45(2):85-104.  
20  
21  
22 29. Buckley L, Bingham CR, Flannagan CA, et al. Observation of motorcycle helmet  
23 use rates in Michigan after partial repeal of the universal motorcycle helmet law.  
24  
25  
26  
27  
28  
29 *Accid Anal Prev.* 2016;95(Pt A):178-186.  
30  
31 30. Kuo SCH, Kuo PJ, Rau CS, et al. The protective effect of helmet use in  
32 motorcycle and bicycle accidents: a propensity score-matched study based on a  
33 trauma registry system. *BMC Public Health.* 2017;17(1):639.  
34  
35  
36  
37 31. Lin KC, Peng SH, Kuo PJ, et al. Patterns Associated with Adult Mandibular  
38 Fractures in Southern Taiwan-A Cross-Sectional Retrospective Study. *Int J*  
39  
40  
41  
42  
43  
44  
45 32. Heydari ST, Vossoughi M, Akbarzadeh A, et al. Prevalence and risk factors of  
46 alcohol and substance abuse among motorcycle drivers in Fars province, Iran.  
47  
48  
49  
50  
51  
52  
53  
54 33. Maistros A, Schneider WHt, Savolainen PT. A comparison of contributing  
55 factors between alcohol related single vehicle motorcycle and car crashes. *J*  
56  
57  
58  
59  
60  
*Safety Res.* 2014;49:129-135.  
34. Hingson R, Fau. HT, Winter M. Effects of Maine's 0.05% legal blood alcohol

- 1  
2  
3 level for drivers with DWI convictions. *Public Health Rep.* 1998;113(5):440-446.  
4  
5  
6 35. Homel R. Drink-driving law enforcement and the legal blood alcohol limit in  
7  
8 New South Wales. *Accid Anal Prev.* 1994;26(2):147-155.  
9  
10  
11 36. Blais E, Bellavance F, Marcil A, Carnis L. Effects of introducing an  
12  
13 administrative .05% blood alcohol concentration limit on law enforcement  
14  
15 patterns and alcohol-related collisions in Canada. *Accid Anal Prev.*  
16  
17 2015;82:101-111.  
18  
19  
20 37. Fell JC, Scherer M. Estimation of the Potential Effectiveness of Lowering the  
21  
22 Blood Alcohol Concentration (BAC) Limit for Driving from 0.08 to 0.05 Grams  
23  
24 per Deciliter in the United States. *Alcohol Clin Exp Res.* 2017;41(12):2128-2139.  
25  
26  
27 38. Chen H, Chen Q, Chen L, Zhang G. Analysis of risk factors affecting driver  
28  
29 injury and crash injury with drivers under the influence of alcohol (DUI) and  
30  
31 non-DUI. *Traffic Inj Prev.* 2016;17(8):796-802.  
32  
33  
34 39. Velmurugan S, Padma S, Madhu E, et al. A study of factors influencing the  
35  
36 severity of road crashes involving drunk drivers and non drunk drivers. *Res*  
37  
38 *Transport Econ.* 2013;38(1):78-83.  
39  
40  
41 40. Li YC, Sze NN, Wong SC. Spatial-temporal analysis of drink-driving patterns in  
42  
43 Hong Kong. *Accid Anal Prev.* 2013;59:415-424.  
44  
45  
46 41. Damsere-Derry J, Palk G, King M. Prevalence of alcohol-impaired driving and  
47  
48 riding in northern Ghana. *Traffic Inj Prev.* 2016;17(3):226-232.  
49  
50  
51 42. Impinen A, Makela P, Karjalainen K, et al. High mortality among people  
52  
53 suspected of drunk-driving. An 18-year register-based follow-up. *Drug Alcohol*  
54  
55 *Depend.* 2010;110(1-2):80-84.  
56  
57  
58 43. Pories SE, Gamelli RL, Vacek P, et al. Intoxication and injury. *J Trauma.*  
59  
60 1992;32(1):60-64.

- 1  
2  
3 44. Luna GK, Maier RV, Sowder L, et al. The influence of ethanol intoxication on  
4  
5 outcome of injured motorcyclists. *J Trauma*. 1984;24(8):695-700.  
6  
7  
8 45. Cherry RA, Nichols PA, Snaveley TM, et al. Resource utilization and outcomes of  
9  
10 intoxicated drivers. *J Trauma Manag Outcomes*. 2010;4:9.  
11  
12 46. Plurad D, Demetriades D, Gruzinski G, et al. Motor vehicle crashes: the  
13  
14 association of alcohol consumption with the type and severity of injuries and  
15  
16 outcomes. *J Emerg Med*. 2010;38(1):12-17.  
17  
18 47. Bachmann M, Dixon AL. DWI Sentencing in the United States: Toward  
19  
20 Promising Punishment Alternatives in Texas. *Int J Crim Just Sci*.  
21  
22 2014;9(2):181-191.  
23  
24 48. Yao J, Johnson MB, Beck KH. Predicting DUI decisions in different legal  
25  
26 environments: investigating deterrence with a conjoint experiment. *Traffic Inj*  
27  
28 *Prev*. 2014;15(3):213-221.  
29  
30 49. Chang K, Wu CC, Ying YH. The effectiveness of alcohol control policies on  
31  
32 alcohol-related traffic fatalities in the United States. *Accid Anal Prev*.  
33  
34 2012;45:406-415.  
35  
36 50. Behnood ALF. The effects of drug and alcohol consumption on driver-injury  
37  
38 severities in single-vehicle crashes. *Traffic Inj Prev*. 2017;18(5):456-462.  
39  
40 51. Behnood A, Roshandeh AM, Mannering FL. Latent class analysis of the effects  
41  
42 of age, gender, and alcohol consumption on driver-injury severities. *Anal*  
43  
44 *Methods Accid Res*. 2014;3-4:56-91.  
45  
46 52. Bogstrand ST, Gjerde H, Normann PT, et al. Alcohol, psychoactive substances  
47  
48 and non-fatal road traffic accidents--a case-control study. *BMC Public Health*.  
49  
50 2012;12:734.  
51  
52 53. Ricci G, Majori S, Mantovani W, et al. Prevalence of alcohol and drugs in urine  
53  
54  
55  
56  
57  
58  
59  
60

1  
2  
3 of patients involved in road accidents. *J Prev Med Hyg.* 2008;49(2):89-95.  
4  
5  
6  
7  
8  
9  
10  
11  
12  
13  
14  
15  
16  
17  
18  
19  
20  
21  
22  
23  
24  
25  
26  
27  
28  
29  
30  
31  
32  
33  
34  
35  
36  
37  
38  
39  
40  
41  
42  
43  
44  
45  
46  
47  
48  
49  
50  
51  
52  
53  
54  
55  
56  
57  
58  
59  
60

For peer review only

Table 1. Patient characteristics, clinical variables, and vehicular crash-related variables before and after BAC limit change.

|                      | Before BAC<br>limit change | After BAC limit<br>change | <i>p</i>            |
|----------------------|----------------------------|---------------------------|---------------------|
| Gender, n (%)        |                            |                           | 0.028               |
| Male                 | 2,041 (60.12%)             | 2,334 (57.6%)             |                     |
| Female               | 1,354 (39.88%)             | 1,718 (42.4%)             |                     |
| Age (years)          | 42.77 (18.34)              | 44.45 (18.97)             | <0.001 <sup>a</sup> |
| DUI, n (%)           |                            |                           | <0.001              |
| Yes                  | 373 (10.99%)               | 269 (6.64%)               |                     |
| No                   | 3,022 (89.01%)             | 3,783 (93.36%)            |                     |
| BAC (mg/dL)          | 21.19 (62.49)              | 12.31 (47.12)             | <0.001 <sup>a</sup> |
| Car, n (%)           |                            |                           | 0.057               |
| Airbag               | 73 (70.19%)                | 61 (57.55%)               |                     |
| No airbag            | 31 (29.81%)                | 45 (42.45%)               |                     |
| Motorcycle, n (%)    |                            |                           | <0.001              |
| Helmet               | 2,876 (87.39%)             | 3,560 (90.22%)            |                     |
| No Helmet            | 415 (12.61%)               | 386 (9.78%)               |                     |
| ISS                  | 9 (9)                      | 9 (9)                     | 0.041 <sup>a</sup>  |
| Hospital stay (days) | 6 (7)                      | 7 (8)                     | 0.198 <sup>a</sup>  |
| Mortality, n (%)     |                            |                           | 0.125               |
| Alive                | 3,357 (98.88%)             | 3,990 (98.47%)            |                     |
| Death                | 38 (1.12%)                 | 62 (1.53%)                |                     |
| Seasons, n (%)       |                            |                           | <0.001              |
| Spring               | 605 (17.82%)               | 994 (24.53%)              |                     |
| Summer               | 874 (25.74%)               | 1,008 (24.88%)            |                     |

|    |                 |                |                |        |
|----|-----------------|----------------|----------------|--------|
| 1  | Autumn          | 970 (28.57%)   | 962 (23.74%)   |        |
| 2  | Winter          | 946 (27.86%)   | 1,088 (26.85%) |        |
| 3  |                 |                |                |        |
| 4  |                 |                |                |        |
| 5  | Time, n (%)     |                |                | <0.001 |
| 6  |                 |                |                |        |
| 7  | 6AM - 2PM       | 1,351 (39.79%) | 1,822 (44.97%) |        |
| 8  |                 |                |                |        |
| 9  | 2PM - 10PM      | 1,436 (42.30%) | 1,608 (39.68%) |        |
| 10 |                 |                |                |        |
| 11 | 10PM - 6AM      | 608 (17.91%)   | 622 (15.35%)   |        |
| 12 |                 |                |                |        |
| 13 |                 |                |                |        |
| 14 | Weekdays, n (%) |                |                | 0.012  |
| 15 |                 |                |                |        |
| 16 | Monday          | 487 (14.34%)   | 639 (15.77%)   |        |
| 17 |                 |                |                |        |
| 18 | Tuesday         | 553 (16.29%)   | 558 (13.77%)   |        |
| 19 |                 |                |                |        |
| 20 | Wednesday       | 440 (12.96%)   | 587 (14.49%)   |        |
| 21 |                 |                |                |        |
| 22 | Thursday        | 494 (14.55%)   | 590 (14.56%)   |        |
| 23 |                 |                |                |        |
| 24 | Friday          | 480 (14.14%)   | 613 (15.13%)   |        |
| 25 |                 |                |                |        |
| 26 | Saturday        | 504 (14.85%)   | 582 (14.36%)   |        |
| 27 |                 |                |                |        |
| 28 | Sunday          | 437 (12.87%)   | 483 (11.92%)   |        |
| 29 |                 |                |                |        |
| 30 |                 |                |                |        |
| 31 |                 |                |                |        |

a

Mann-Whitney

test

Table 2. Patient characteristics, clinical variables, and crash-related variables in DUI (BAC  $\geq$ 30 mg/dL) and non-DUI patients.

|                      | DUI           | Non-DUI        | <i>p</i>            |
|----------------------|---------------|----------------|---------------------|
| Gender, n (%)        |               |                | <0.001              |
| Male                 | 568 (88.47%)  | 3,807 (55.94%) |                     |
| Female               | 74 (11.53%)   | 2,998 (44.06%) |                     |
| Age (years)          | 39.64 (12.76) | 44.07 (19.13)  | <0.001 <sup>a</sup> |
| Car, n (%)           |               |                | 0.020               |
| Airbag               | 25 (50.00%)   | 109 (68.13%)   |                     |
| No airbag            | 25 (50.00%)   | 51 (31.88%)    |                     |
| Motorcycle, n (%)    |               |                | <0.001              |
| Helmet               | 433 (73.14%)  | 6,003 (90.34%) |                     |
| No Helmet            | 159 (26.86%)  | 642 (9.66%)    |                     |
| ISS                  | 13 (14)       | 9 (7)          | <0.001 <sup>a</sup> |
| Hospital stay (days) | 8 (11)        | 6 (7)          | <0.001 <sup>a</sup> |
| Mortality, n (%)     |               |                | <0.001              |
| Alive                | 612 (95.33%)  | 6,735 (98.97%) |                     |
| Death                | 30 (4.67%)    | 70 (1.03%)     |                     |
| Seasons, n (%)       |               |                | 0.522               |
| Spring               | 135 (21.03%)  | 1,464 (21.51%) |                     |
| Summer               | 153 (23.83%)  | 1,729 (25.41%) |                     |
| Autumn               | 163 (25.39%)  | 1,769 (26.00%) |                     |
| Winter               | 191 (29.75%)  | 1,843 (27.08%) |                     |
| Time, n (%)          |               |                | <0.001              |
| 6AM - 2PM            | 70 (10.90%)   | 3,103 (45.60%) |                     |
| 2PM - 10PM           | 249 (38.79%)  | 2,795 (41.07%) |                     |

|    |                 |              |                |
|----|-----------------|--------------|----------------|
| 1  | 10PM - 6AM      | 323 (50.31%) | 907 (13.33%)   |
| 2  |                 |              |                |
| 3  | Weekdays, n (%) |              | <0.001         |
| 4  |                 |              |                |
| 5  | Monday          | 81 (12.62%)  | 1,045 (15.36%) |
| 6  |                 |              |                |
| 7  | Tuesday         | 72 (11.21%)  | 1,039 (15.27%) |
| 8  |                 |              |                |
| 9  | Wednesday       | 85 (13.24%)  | 942 (13.84%)   |
| 10 |                 |              |                |
| 11 | Thursday        | 79 (12.31%)  | 1,005 (14.77%) |
| 12 |                 |              |                |
| 13 | Friday          | 81 (12.62%)  | 1,012 (14.87%) |
| 14 |                 |              |                |
| 15 | Saturday        | 120 (18.69%) | 966 (14.20%)   |
| 16 |                 |              |                |
| 17 | Sunday          | 124 (19.31%) | 796 (11.70%)   |
| 18 |                 |              |                |
| 19 |                 |              |                |

---

<sup>a</sup> Mann-Whitney test



Table 3. Homogeneity analysis of variables related to DUI before and after BAC limit change.

|                  | Before BAC limit change |               |                    | After BAC limit change |               |                        | Crude OR<br>(95% CI) | <i>p</i> |
|------------------|-------------------------|---------------|--------------------|------------------------|---------------|------------------------|----------------------|----------|
|                  | DUI                     | Non-DUI       | OR (95% CI)        | DUI                    | Non-DUI       | OR (95% CI)            |                      |          |
| Gender, n (%)    |                         |               |                    |                        |               |                        |                      |          |
| Male             | 331 (9.75%)             | 1710 (50.37%) | 6.05 (4.35-8.40)   | 237 (5.85%)            | 2097 (51.75%) | 5.96 (4.09-8.66)       | 6.01 (4.69-7.69)     | 0.952    |
| Female           | 42 (1.24%)              | 1312 (38.65%) |                    | 32 (0.79%)             | 1686 (41.61%) |                        |                      |          |
| Mortality, n (%) |                         |               |                    |                        |               |                        |                      |          |
| Alive            | 360 (10.60%)            | 2997 (88.28%) | 4.33 (2.20-8.54)   | 252 (6.22%)            | 3738 (92.25%) | 5.60 (3.16-9.93)       | 4.98 (3.21-7.73)     | 0.568    |
| Death            | 13 (0.38)               | 25 (0.74%)    |                    | 17 (0.42%)             | 45 (1.11%)    |                        |                      |          |
| Time, n (%)      |                         |               |                    |                        |               |                        |                      | <0.001   |
| 6AM – 2PM        | 46 (12.33%)             | 1305 (43.18%) | 1                  | 24 (8.92%)             | 1798 (47.53%) | 1                      |                      |          |
| 2PM – 10PM       | 139 (37.27%)            | 1297 (42.92%) | 3.04 (2.16-4.28)   | 110 (40.89%)           | 1498 (39.60%) | 5.50 (3.52-8.60)       |                      |          |
| 10PM – 6AM       | 188 (50.40%)            | 420 (13.90%)  | 12.70 (9.03-17.85) | 135 (50.19%)           | 487 (12.87%)  | 20.76<br>(13.30-32.41) |                      |          |
| Car, n (%)       |                         |               |                    |                        |               |                        |                      |          |
| Airbag           | 19 (59.38%)             | 54 (75.00%)   | 0.49 (0.20-1.18)   | 6 (33.33%)             | 55 (62.50%)   | 0.30 (0.10-0.88)       |                      | 0.007    |
| No airbag        | 13 (40.63%)             | 18 (25.00%)   |                    | 12 (66.67%)            | 33 (37.50%)   |                        |                      |          |

|    |                                    |              |               |                  |              |               |                  |                  |
|----|------------------------------------|--------------|---------------|------------------|--------------|---------------|------------------|------------------|
| 1  |                                    |              |               |                  |              |               |                  |                  |
| 2  | Saturday                           | 72 (19.30%)  | 432 (14.30%)  | 0.83 (0.58-1.18) | 48 (17.84%)  | 534 (14.12%)  | 0.76 (0.50-1.15) |                  |
| 3  |                                    |              |               |                  |              |               |                  |                  |
| 4  | Motorcycle n (%)                   |              |               |                  |              |               |                  | <0.001           |
| 5  |                                    |              |               |                  |              |               |                  |                  |
| 6  | Helmet                             | 261 (76.54%) | 2615 (88.64%) | 0.42 (0.32-0.55) | 172 (68.53%) | 3388 (91.69%) | 0.20 (0.15-0.26) |                  |
| 7  |                                    |              |               |                  |              |               |                  |                  |
| 8  | No Helmet                          | 80 (23.46%)  | 335 (11.36%)  |                  | 79 (31.47%)  | 307 (8.31%)   |                  |                  |
| 9  |                                    |              |               |                  |              |               |                  |                  |
| 10 |                                    |              |               |                  |              |               |                  |                  |
| 11 | Seasons, n (%)                     |              |               |                  |              |               |                  | 0.456            |
| 12 |                                    |              |               |                  |              |               |                  |                  |
| 13 | Spring                             | 63 (16.89%)  | 542 (17.94%)  | 1                | 72 (26.77%)  | 922 (24.37%)  | 1                |                  |
| 14 |                                    |              |               |                  |              |               |                  |                  |
| 15 | Summer                             | 98 (26.27%)  | 776 (25.68%)  | 1.09 (0.78-1.52) | 55 (20.45%)  | 953 (25.19%)  | 0.74 (0.51-1.06) | 0.96 (0.75-1.22) |
| 16 |                                    |              |               |                  |              |               |                  |                  |
| 17 | Autumn                             | 94 (25.20%)  | 876 (28.99%)  | 0.92 (0.66-1.29) | 69 (25.65%)  | 893 (23.61%)  | 0.99 (0.70-1.39) | 1.00 (0.79-1.27) |
| 18 |                                    |              |               |                  |              |               |                  |                  |
| 19 | Winter                             | 118 (31.64%) | 828 (27.40%)  | 1.23 (0.89-1.70) | 73 (27.14%)  | 1015 (26.83%) | 0.92 (0.66-1.29) | 1.12 (0.89-1.42) |
| 20 |                                    |              |               |                  |              |               |                  |                  |
| 21 |                                    |              |               |                  |              |               |                  |                  |
| 22 | Weekdays, n (%)                    |              |               |                  |              |               |                  | <0.001           |
| 23 |                                    |              |               |                  |              |               |                  |                  |
| 24 | Sunday                             | 73 (19.57%)  | 364 (12.05%)  | 1                | 51 (18.96%)  | 432 (11.42%)  | 1                |                  |
| 25 |                                    |              |               |                  |              |               |                  |                  |
| 26 | Monday                             | 40 (10.72%)  | 447 (14.79%)  | 0.45 (0.30-0.67) | 41 (15.24%)  | 598 (15.81%)  | 0.58 (0.38-0.89) |                  |
| 27 |                                    |              |               |                  |              |               |                  |                  |
| 28 | Tuesday                            | 45 (12.06%)  | 508 (16.81%)  | 0.44 (0.30-0.66) | 27 (10.04%)  | 531 (14.04%)  | 0.43 (0.27-0.70) |                  |
| 29 |                                    |              |               |                  |              |               |                  |                  |
| 30 | Wednesday                          | 47 (12.60%)  | 393 (13.00%)  | 0.60 (0.40-0.88) | 38 (14.13%)  | 549 (14.51)   | 0.57 (0.38-0.91) |                  |
| 31 |                                    |              |               |                  |              |               |                  |                  |
| 32 | Thursday                           | 50 (13.40%)  | 444 (14.69%)  | 0.56 (0.38-0.83) | 29 (10.78%)  | 561 (14.83%)  | 0.44 (0.27-0.70) |                  |
| 33 |                                    |              |               |                  |              |               |                  |                  |
| 34 | Friday                             | 46 (12.33%)  | 434 (14.36%)  | 0.53 (0.36-0.78) | 35 (13.01%)  | 578 (15.28%)  | 0.51 (0.33-0.80) |                  |
| 35 |                                    |              |               |                  |              |               |                  |                  |
| 36 |                                    |              |               |                  |              |               |                  |                  |
| 37 |                                    |              |               |                  |              |               |                  |                  |
| 38 |                                    |              |               |                  |              |               |                  |                  |
| 39 | <sup>a</sup> Breslow-Day statistic |              |               |                  |              |               |                  |                  |
| 40 |                                    |              |               |                  |              |               |                  |                  |
| 41 |                                    |              |               |                  |              |               |                  |                  |
| 42 |                                    |              |               |                  |              |               |                  |                  |
| 43 |                                    |              |               |                  |              |               |                  |                  |
| 44 |                                    |              |               |                  |              |               |                  |                  |
| 45 |                                    |              |               |                  |              |               |                  |                  |
| 46 |                                    |              |               |                  |              |               |                  |                  |

Table 4. The distribution of Abbreviated Injury Scale (AIS) score by region in DUI (BAC  $\geq$ 30 mg/dL) and non-DUI patients.

|           | DUI          | Non-DUI       | OR (95% CI)       | <i>p</i> |
|-----------|--------------|---------------|-------------------|----------|
| Head/Neck |              |               |                   | < 0.0001 |
| 0         | 269 (41.90%) | 4799 (70.52%) | 1                 |          |
| 1         | 94 (14.64%)  | 638 (9.38%)   | 2.63 (2.05-3.37)  |          |
| 2         | 22 (3.43%)   | 105 (1.54%)   | 3.74 (2.32-6.02)  |          |
| 3         | 81 (12.62%)  | 506 (7.44%)   | 2.86 (2.19-3.72)  |          |
| 4         | 131 (20.40%) | 597 (8.77%)   | 3.92 (3.12-4.91)  |          |
| 5-6       | 45 (7.01%)   | 1160 (2.35%)  | 0.69 (0.50-0.96)  |          |
| Face      |              |               |                   | < 0.0001 |
| 0         | 361 (56.23%) | 5342 (78.50%) | 1                 |          |
| 1         | 64 (9.97%)   | 493 (7.24%)   | 1.921 (1.45-2.55) |          |
| 2         | 215 (33.49%) | 949 (13.95%)  | 3.353 (2.79-4.02) |          |
| 3         | 2 (0.31%)    | 21 (0.31%)    | 1.409 (0.33-6.03) |          |
| Thorax    |              |               |                   | < 0.0001 |
| 0         | 488 (76.01%) | 5640 (82.88%) | 1                 |          |
| 1         | 31 (4.83%)   | 220 (3.23%)   | 1.63 (1.11-2.40)  |          |
| 2         | 27 (4.21%)   | 306 (4.50%)   | 1.02 (0.681-1.53) |          |
| 3         | 57 (8.88%)   | 437 (6.42%)   | 1.51 (1.13-2.02)  |          |
| 4         | 37 (5.76%)   | 196 (2.88%)   | 2.18 (1.52-3.14)  |          |
| 5-6       | 2 (0.32%)    | 6 (0.08%)     | 3.85 (0.78-19.14) |          |
| Abdomen   |              |               |                   | < 0.0001 |
| 0         | 552 (85.98%) | 6319 (92.86%) | 1                 |          |
| 1         | 7 (1.09%)    | 38 (0.56%)    | 2.109 (0.94-4.74) |          |

|             |              |               |                   |
|-------------|--------------|---------------|-------------------|
| 2           | 42 (6.54%)   | 222 (3.26%)   | 2.166 (1.57-3.05) |
| 3           | 23 (3.58%)   | 141 (2.07%)   | 1.867 (1.19-2.93) |
| 4           | 13 (2.02%)   | 69 (1.01%)    | 2.157 (1.19-3.93) |
| 5           | 5 (0.78%)    | 16 (0.24%)    | 3.583 (1.31-9.81) |
| Extremities |              |               | < 0.0001          |
| 0           | 261 (40.65%) | 1839 (29.02%) | 1                 |
| 1           | 63 (9.81%)   | 435 (6.39%)   | 1.020 (0.76-1.37) |
| 2           | 185 (28.82%) | 2973 (43.69%) | 0.438 (0.36-0.53) |
| 3-5         | 133 (20.72%) | 1558 (22.89%) | 0.61 (0.48-0.75)  |
| 14          |              |               | 0.195             |
| 0           | 536 (83.49%) | 5799 (85.22%) | 1                 |
| 1           | 102 (15.89%) | 981 (14.42%)  | 1.125 (0.90-1.41) |
| 2           | 4 (0.62%)    | 25 (0.37%)    | 1.731 (0.60-4.99) |

### Figure legends

Figure 1. Monthly number of DUI (BAC  $\geq$ 30 mg/dL) patients before and after BAC limit change.

Figure 2. DUI (BAC  $\geq$ 30 mg/dL) event density over the 71 district areas of southern Taiwan (A, before BAC limit change; B, after BAC limit change).

1  
2  
3  
4  
5  
6  
7  
8  
9  
10  
11  
12  
13  
14  
15  
16  
17  
18  
19  
20  
21  
22  
23  
24  
25  
26  
27  
28  
29  
30  
31  
32  
33  
34  
35  
36  
37  
38  
39  
40  
41  
42  
43  
44  
45  
46  
47  
48  
49  
50  
51  
52  
53  
54  
55  
56  
57  
58  
59  
60

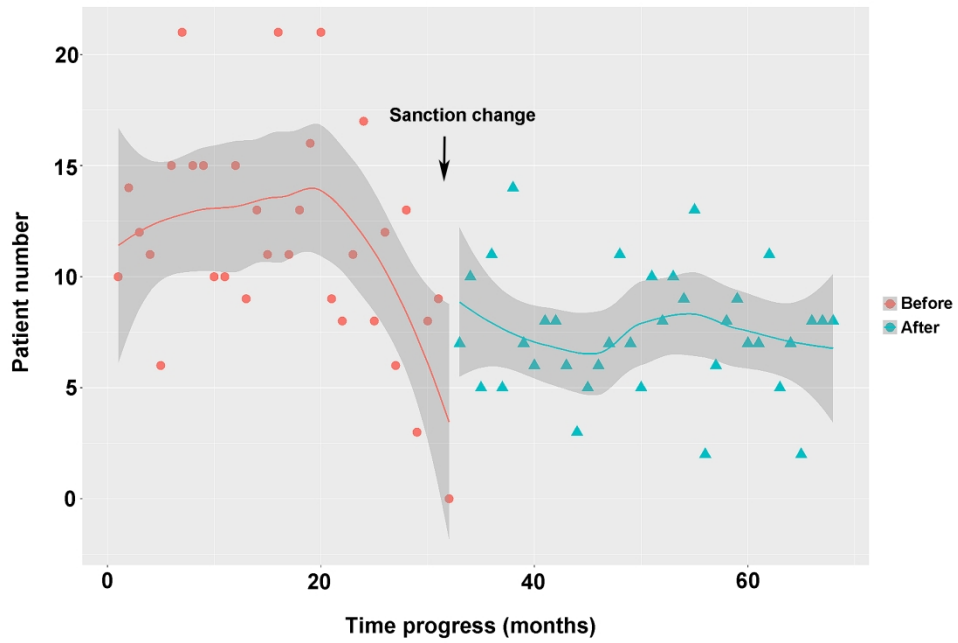

The monthly DUI patient number before (July 2009 to December 2012) and after (July 2013 to December 2016) sanction change with multivariate regression line

224x153mm (300 x 300 DPI)

1  
2  
3  
4  
5  
6  
7  
8  
9  
10  
11  
12  
13  
14  
15  
16  
17  
18  
19  
20  
21  
22  
23  
24  
25  
26  
27  
28  
29  
30  
31  
32  
33  
34  
35  
36  
37  
38  
39  
40  
41  
42  
43  
44  
45  
46  
47  
48  
49  
50  
51  
52  
53  
54  
55  
56  
57  
58  
59  
60

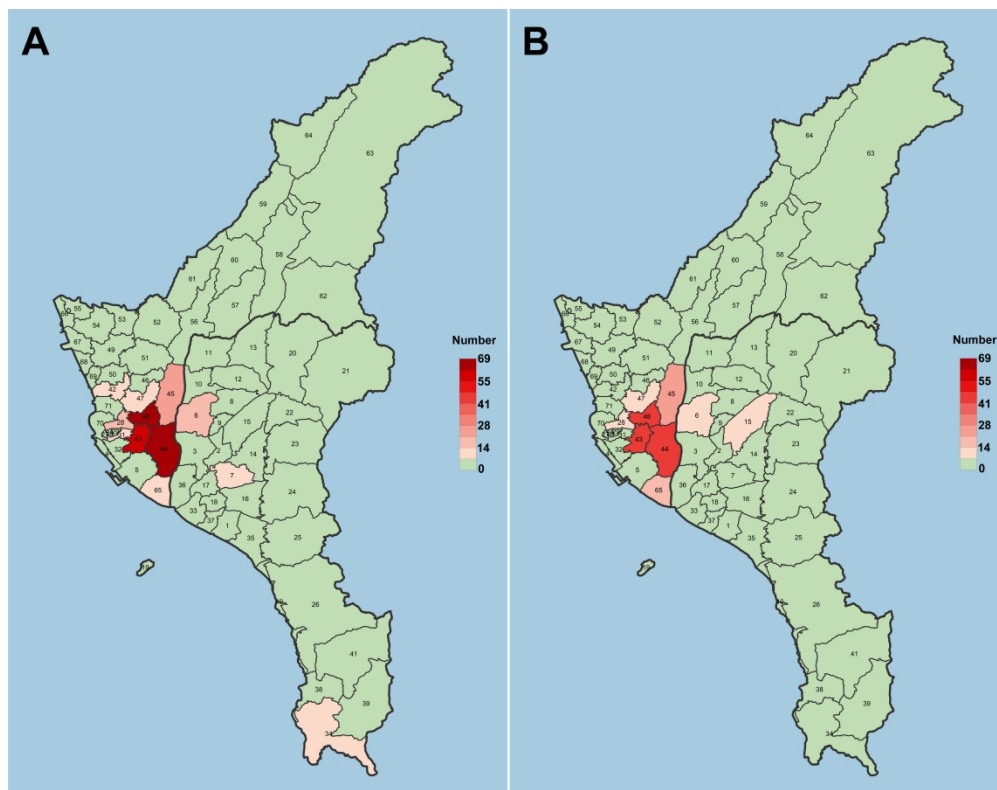

DUI event density over the 71 district areas of southern Taiwan (A. before sanction change; B. after sanction change)

350x273mm (300 x 300 DPI)

STROBE Statement—Checklist of items that should be included in reports of *cross-sectional studies*

|                              | Item No | Recommendation                                                                                                                                                                                               | Page No |
|------------------------------|---------|--------------------------------------------------------------------------------------------------------------------------------------------------------------------------------------------------------------|---------|
| <b>Title and abstract</b>    | 1       | (a) Indicate the study's design with a commonly used term in the title or the abstract                                                                                                                       | 2       |
|                              |         | (b) Provide in the abstract an informative and balanced summary of what was done and what was found                                                                                                          | 2       |
| <b>Introduction</b>          |         |                                                                                                                                                                                                              |         |
| Background/rationale         | 2       | Explain the scientific background and rationale for the investigation being reported                                                                                                                         | 4       |
| Objectives                   | 3       | State specific objectives, including any prespecified hypotheses                                                                                                                                             | 4       |
| <b>Methods</b>               |         |                                                                                                                                                                                                              |         |
| Study design                 | 4       | Present key elements of study design early in the paper                                                                                                                                                      | 6       |
| Setting                      | 5       | Describe the setting, locations, and relevant dates, including periods of recruitment, exposure, follow-up, and data collection                                                                              | 6       |
| Participants                 | 6       | (a) Give the eligibility criteria, and the sources and methods of selection of participants                                                                                                                  | 6       |
| Variables                    | 7       | Clearly define all outcomes, exposures, predictors, potential confounders, and effect modifiers. Give diagnostic criteria, if applicable                                                                     | 7       |
| Data sources/<br>measurement | 8*      | For each variable of interest, give sources of data and details of methods of assessment (measurement). Describe comparability of assessment methods if there is more than one group                         | 7       |
| Bias                         | 9       | Describe any efforts to address potential sources of bias                                                                                                                                                    | -       |
| Study size                   | 10      | Explain how the study size was arrived at                                                                                                                                                                    | 6       |
| Quantitative variables       | 11      | Explain how quantitative variables were handled in the analyses. If applicable, describe which groupings were chosen and why                                                                                 | 6       |
| Statistical methods          | 12      | (a) Describe all statistical methods, including those used to control for confounding                                                                                                                        | 7       |
|                              |         | (b) Describe any methods used to examine subgroups and interactions                                                                                                                                          | 7       |
|                              |         | (c) Explain how missing data were addressed                                                                                                                                                                  | 6       |
|                              |         | (d) If applicable, describe analytical methods taking account of sampling strategy                                                                                                                           | -       |
|                              |         | (e) Describe any sensitivity analyses                                                                                                                                                                        | 6       |
| <b>Results</b>               |         |                                                                                                                                                                                                              |         |
| Participants                 | 13*     | (a) Report numbers of individuals at each stage of study—eg numbers potentially eligible, examined for eligibility, confirmed eligible, included in the study, completing follow-up, and analysed            | 6       |
|                              |         | (b) Give reasons for non-participation at each stage                                                                                                                                                         | -       |
|                              |         | (c) Consider use of a flow diagram                                                                                                                                                                           | -       |
| Descriptive data             | 14*     | (a) Give characteristics of study participants (eg demographic, clinical, social) and information on exposures and potential confounders                                                                     | 8-10    |
|                              |         | (b) Indicate number of participants with missing data for each variable of interest                                                                                                                          | -       |
| Outcome data                 | 15*     | Report numbers of outcome events or summary measures                                                                                                                                                         | 8-10    |
| Main results                 | 16      | (a) Give unadjusted estimates and, if applicable, confounder-adjusted estimates and their precision (eg, 95% confidence interval). Make clear which confounders were adjusted for and why they were included | 8-10    |

|                          |    |                                                                                                                                                                            |       |
|--------------------------|----|----------------------------------------------------------------------------------------------------------------------------------------------------------------------------|-------|
|                          |    | (b) Report category boundaries when continuous variables were categorized                                                                                                  | -     |
|                          |    | (c) If relevant, consider translating estimates of relative risk into absolute risk for a meaningful time period                                                           | -     |
| Other analyses           | 17 | Report other analyses done—eg analyses of subgroups and interactions, and sensitivity analyses                                                                             | -     |
| <b>Discussion</b>        |    |                                                                                                                                                                            |       |
| Key results              | 18 | Summarise key results with reference to study objectives                                                                                                                   | 11    |
| Limitations              | 19 | Discuss limitations of the study, taking into account sources of potential bias or imprecision. Discuss both direction and magnitude of any potential bias                 | 13-14 |
| Interpretation           | 20 | Give a cautious overall interpretation of results considering objectives, limitations, multiplicity of analyses, results from similar studies, and other relevant evidence | 11    |
| Generalisability         | 21 | Discuss the generalisability (external validity) of the study results                                                                                                      | -     |
| <b>Other information</b> |    |                                                                                                                                                                            |       |
| Funding                  | 22 | Give the source of funding and the role of the funders for the present study and, if applicable, for the original study on which the present article is based              | 14    |

\*Give information separately for exposed and unexposed groups.

**Note:** An Explanation and Elaboration article discusses each checklist item and gives methodological background and published examples of transparent reporting. The STROBE checklist is best used in conjunction with this article (freely available on the Web sites of PLoS Medicine at <http://www.plosmedicine.org/>, Annals of Internal Medicine at <http://www.annals.org/>, and Epidemiology at <http://www.epidem.com/>). Information on the STROBE Initiative is available at [www.strobe-statement.org](http://www.strobe-statement.org).



# BMJ Open

## The effect of lowering the legal blood alcohol concentration limit on driving under the influence (DUI) in southern Taiwan – a cross-sectional retrospective analysis

|                                 |                                                                                                                                                                                                                                                                                                                                                                                                                                                                                                                                                                                                                                                                                                                                                                                                                                                                                                                                                                                                                                                                                                |
|---------------------------------|------------------------------------------------------------------------------------------------------------------------------------------------------------------------------------------------------------------------------------------------------------------------------------------------------------------------------------------------------------------------------------------------------------------------------------------------------------------------------------------------------------------------------------------------------------------------------------------------------------------------------------------------------------------------------------------------------------------------------------------------------------------------------------------------------------------------------------------------------------------------------------------------------------------------------------------------------------------------------------------------------------------------------------------------------------------------------------------------|
| Journal:                        | <i>BMJ Open</i>                                                                                                                                                                                                                                                                                                                                                                                                                                                                                                                                                                                                                                                                                                                                                                                                                                                                                                                                                                                                                                                                                |
| Manuscript ID                   | bmjopen-2018-026481.R3                                                                                                                                                                                                                                                                                                                                                                                                                                                                                                                                                                                                                                                                                                                                                                                                                                                                                                                                                                                                                                                                         |
| Article Type:                   | Research                                                                                                                                                                                                                                                                                                                                                                                                                                                                                                                                                                                                                                                                                                                                                                                                                                                                                                                                                                                                                                                                                       |
| Date Submitted by the Author:   | 18-Feb-2019                                                                                                                                                                                                                                                                                                                                                                                                                                                                                                                                                                                                                                                                                                                                                                                                                                                                                                                                                                                                                                                                                    |
| Complete List of Authors:       | Tsai, Yu-Chin; Kaohsiung Chang Gung Memorial Hospital and Chang Gung University College of Medicine, Department of Neurosurgery Wu, Shao-Chun; Kaohsiung Chang Gung Memorial Hospital and Chang Gung University College of Medicine, Department of Anesthesiology Huang, Jin-Fu; Kaohsiung Chang Gung Memorial Hospital and Chang Gung University College of Medicine, Department of Neurosurgery Kuo, Spencer C.H.; Kaohsiung Chang Gung Memorial Hospital and Chang Gung University College of Medicine, Department of Plastic Surgery Rau, Cheng-Shyuan; Kaohsiung Chang Gung Memorial Hospital and Chang Gung University College of Medicine, Department of Neurosurgery Chien, Peng-Chen; Kaohsiung Chang Gung Memorial Hospital and Chang Gung University College of Medicine, Department of Plastic Surgery Hsieh, Hsiao-Yun; Kaohsiung Chang Gung Memorial Hospital and Chang Gung University College of Medicine, Department of Plastic Surgery Hsieh, Ching-Hua; Kaohsiung Chang Gung Memorial Hospital and Chang Gung University College of Medicine, Department of Plastic Surgery |
| <b>Primary Subject Heading</b>: | Public health                                                                                                                                                                                                                                                                                                                                                                                                                                                                                                                                                                                                                                                                                                                                                                                                                                                                                                                                                                                                                                                                                  |
| Secondary Subject Heading:      | Addiction, Epidemiology, Public health                                                                                                                                                                                                                                                                                                                                                                                                                                                                                                                                                                                                                                                                                                                                                                                                                                                                                                                                                                                                                                                         |
| Keywords:                       | driving under the influence, alcohol, mortality, helmet use, airbag                                                                                                                                                                                                                                                                                                                                                                                                                                                                                                                                                                                                                                                                                                                                                                                                                                                                                                                                                                                                                            |
|                                 |                                                                                                                                                                                                                                                                                                                                                                                                                                                                                                                                                                                                                                                                                                                                                                                                                                                                                                                                                                                                                                                                                                |

SCHOLARONE™  
Manuscripts

1  
2  
3 **The effect of lowering the legal blood alcohol concentration limit on driving**  
4 **under the influence (DUI) in southern Taiwan – a cross-sectional retrospective**  
5 **analysis**  
6  
7  
8  
9

10 Yu-Chin Tsai<sup>1\*</sup>, MD., M.Sc.; Shao-Chun Wu<sup>2\*</sup>, MD.; Jin-Fu Huang<sup>1</sup>, MD.; Spencer  
11 C.H. Kuo<sup>3</sup>, M.D.; Cheng-Shyuan Rau<sup>1</sup>, M.D.; Peng-Chen Chien<sup>3</sup>, M.Sc. Hsiao-Yun  
12 Hsieh<sup>3</sup>, M.Sc.; Ching-Hua Hsieh<sup>3</sup>, M.D., PhD.  
13  
14  
15  
16  
17  
18

19 <sup>1</sup> Department of Neurosurgery, Kaohsiung Chang Gung Memorial Hospital and Chang  
20 Gung University College of Medicine, Taiwan  
21  
22

23 <sup>2</sup> Department of Anesthesiology, Kaohsiung Chang Gung Memorial Hospital and  
24 Chang Gung University College of Medicine, Taiwan  
25  
26  
27

28 <sup>3</sup> Department of Plastic Surgery, Kaohsiung Chang Gung Memorial Hospital and  
29 Chang Gung University College of Medicine, Taiwan  
30  
31  
32

33  
34  
35 Yu-Chin Tsai; e-mail: vagility@gmail.com  
36

37 Shao-Chun Wu; e-mail: shaochunwu@gmail.com  
38

39 Jin-Fu Huang; e-mail: stillloop@gmail.com  
40

41 Spencer C.H. Kuo; e-mail: spenc19900603@gmail.com  
42

43 Cheng-Shyuan Rau; e-mail: ersh2127@cloud.cgmh.org.tw  
44

45 Peng-Chen Chien; e-mail: VENU\_CHIEN@hotmail.com  
46

47 Hsiao-Yun Hsieh; e-mail: sylvia19870714@hotmail.com  
48

49 Ching-Hua Hsieh; e-mail: m93chinghua@gmail.com  
50  
51  
52

53  
54  
55  
56 \*indicated equal contribution to the authorship by Y.-C.T. & S.-C.W.  
57

58 Corresponding author: Ching-Hua Hsieh, M.D., PhD., FACS.  
59  
60

1  
2  
3 Department of Plastic Surgery, Kaohsiung Chang Gung Memorial Hospital and  
4  
5 Chang Gung University College of Medicine, Taiwan  
6

7 No.123, Ta-Pei Road, Niao-Song District, Kaohsiung City 833, Taiwan

8  
9  
10 Tel: 886-7-3454746; E-mail: m93chinghua@gmail.com  
11  
12  
13

#### 14 15 **ABSTRACT**

16  
17 **Objectives:** We aimed to profile the epidemiological changes of driving under the  
18  
19 influence (DUI) in southern Taiwan after the legal blood alcohol concentration (BAC)  
20  
21 limit was lowered from 50 to 30 mg/dL in 2013.  
22  
23

24 **Setting:** Level 1 trauma medical center in southern Taiwan.

25  
26 **Participants:** Data from 7,447 patients (4,375 males and 3,072 females) were  
27  
28 retrieved from the Trauma Registry System of a single trauma center to examine  
29  
30 patient characteristics (gender, age, and BAC), clinical outcome variables  
31  
32 (Abbreviated Injury Score (AIS), Injury Severity Score (ISS), and mortality), and  
33  
34 vehicular crash-related factors (vehicle type, airbag use in car crashes, helmet use in  
35  
36 motorcycle crashes, and time of crash) before and after the BAC limit change.  
37  
38

39  
40 **Results:** Our results indicated that the percentage of DUI patients significantly  
41  
42 declined from 10.99% (n=373) to 6.64% (n=269) after the BAC limit was lowered.  
43  
44 Airbag use in car crashes (OR: 0.30, 95% CI: 0.10-0.88, p=0.007) and helmet use in  
45  
46 motorcycle crashes (OR: 0.20, 95% CI: 0.15-0.26, p <0.001) was lower in DUI  
47  
48 patients compared to non-DUI patients after the BAC limit change, with significant  
49  
50 negative correlation. DUI behavior increased crash mortality risk before the BAC  
51  
52 limit change (OR: 4.33, 95% CI: 2.20-8.54), and even more so after (OR: 5.60, 95%  
53  
54 CI: 3.16-9.93). The difference in ORs for mortality before and after the change in the  
55  
56 BAC legal limit was not significant (p = 0.568).  
57  
58  
59  
60

1  
2  
3 **Conclusion:** This study revealed that lowering the BAC limit to 30 mg/dL  
4 significantly reduced the number of DUI events, but failed to result in a significant  
5 reduction in mortality in these trauma patients.  
6  
7  
8

9 **Keywords** driving under the influence; alcohol; mortality; helmet use; airbag  
10  
11  
12

### 13 **Strengths and limitations of this study**

- 14 1. The data were retrieved from the registered trauma database which data was  
15 prospectively collected with internal validation.
- 16 2. This study compared the same span of time before and after BAC limit change.
- 17 3. This study was limited by its retrospective design.
- 18 4. Some confounders like baseline characteristics, the use of psychoactive  
19 medication, and the exact time elapsed from injury to an alcohol test may lead to  
20 a bias in assessment.
- 21 5. Data from one trauma center may not indicate the observed effect could be  
22 generalized to other regions or countries.  
23  
24  
25  
26  
27  
28  
29  
30  
31  
32  
33  
34  
35  
36  
37  
38  
39  
40  
41  
42  
43  
44  
45  
46  
47  
48  
49  
50  
51  
52  
53  
54  
55  
56  
57  
58  
59  
60

## INTRODUCTION

According to the World Health Organization (WHO), over 1.2 million people die each year in road traffic crashes, with 75% of the fatalities occurring in men in the economically active age range <sup>1</sup>. It is estimated that over 90% of road traffic deaths occur in low-income and middle-income countries, causing significant GDP losses of up to 5% <sup>2</sup>. Driving under the influence (DUI) of alcohol increases the risk of crash as well as the severity of crash-related injuries, and results in longer hospital stays, higher healthcare costs, and poorer outcomes compared to drivers in non-DUI-related crashes <sup>3-6</sup>. In particular, when the driver's blood alcohol concentration (BAC) exceeds 50 mg/dL, the risk and severity of traffic crashes increase remarkably <sup>7-10</sup>. Efforts to reduce alcohol-impaired driving have included implementing laws regarding minimum legal drinking age and BAC limit when driving, taxation of alcohol, providing alcohol education, and establishing alcohol treatment programs <sup>11</sup>.

Over the past decade (2007-2016), DUI-related traffic crashes have caused over 3000 deaths and approximately 110,000 injuries in Taiwan <sup>12</sup>. Nevertheless, prior to April 1999, DUI was not deemed a serious crime in Taiwan: it was legal to drive with BAC of 50 mg/dL; drivers with BAC between 50 and 110 mg/dL violated Road Traffic Security Rules and faced license suspension or revocation, or a financial penalty; drivers with BAC >110 mg/dL violated Article 185 of the Criminal Law, but would only face imprisonment of less than a year and fines of less than 30,000 New Taiwan Dollars (NTD) (~1,000 US dollars). In more recent years, DUI has received increased media attention, as alcohol-impaired traffic crashes are frequently reported. A series of amendments were made to the Road Traffic Management and Penalty Act,

1  
2  
3 Road Traffic Security Rules, and Article 185 of the Criminal Law <sup>13</sup>, including the  
4  
5 most recent amendment to Road Traffic Security Rules in 2013, which lowered the  
6  
7 legal BAC limit from 50 mg/dL to 30 mg/dL. In addition, financial penalties were  
8  
9 increased by up to 50%. According to national statistics, alcohol-impaired driving  
10  
11 casualties reduced after these regulation and law changes <sup>13</sup>. However, data on  
12  
13 monthly injuries and deaths resulting from DUI-related crashes and number of  
14  
15 monthly DUI violations are obtained from sobriety checkpoints by the police, and  
16  
17 specific data regarding the impact of DUI on medical service utilization after change  
18  
19 in the legal BAC limit are not available. Therefore, we aimed to compare the  
20  
21 epidemiological profile of DUI in southern Taiwan before and after the 2013 change  
22  
23 in legal BAC limit using data from the Trauma Registry System. We examined patient  
24  
25 demographics and outcomes, DUI status, crash-related factors, as well as outcomes  
26  
27 before and after the limit change to define the prognosis and risk factors for  
28  
29 DUI-related injury and mortality, and assess the effect of BAC limit change on these  
30  
31 factors.  
32  
33  
34  
35  
36  
37  
38  
39  
40  
41  
42  
43  
44  
45  
46  
47  
48  
49  
50  
51  
52  
53  
54  
55  
56  
57  
58  
59  
60

## PATIENTS AND METHODS

### Patient and Public Involvement.

The patients and the public were not involved in this study.

We retrospectively collected patient data from the Trauma Registry System of the Kaohsiung Chang Gung Memorial Hospital, a 2686-bed Level I regional trauma center that provides emergent care to trauma patients primarily from southern Taiwan<sup>14,15</sup>. Only drivers in car and motorcycle crashes that occurred in the Kaohsiung and Pingtung areas of Taiwan who were hospitalized between July 2009 and December 2016 were included. Twenty-three patients with incomplete data were excluded, as well as those whose hospital visit took place between January 2013 and June 2013, the period when amendments to the Road Traffic Management and Penalty Act were announced and implemented. This study was approved by the institutional review board (IRB) of the Kaohsiung Chang Gung Memorial Hospital (reference number 201701844B0). Data from 7,447 patients were used for the analysis.

BAC tests were routinely ordered for patients in the emergency room (ER) with clinical suspicion of DUI. Patients with BAC >30 mg/dL (the threshold for DUI after January 2013) were categorized into two groups according to when their visit took place: before BAC limit change (July 2009 to December 2012; n=3,395 patients), and after BAC limit change (July 2013 to December 2016; n=4,052 patients). Detailed patient information was recorded and included the following variables: age, gender, type of vehicle crash, time and location of crash, airbag use (car crashes only), helmet use (motorcycle crashes only), BAC, hospital length of stay (LOS), in-hospital mortality, and crash-related trauma by body region. The Abbreviated Injury Score

(AIS) was used to evaluate injury severity in the following regions: head/neck, face, chest, abdomen, extremities (including pelvis), and external. Patients with higher AIS were combined for analysis in some regional subgroups due to inadequate patient numbers. The Injury Severity Score (ISS) was calculated by summing the square of the three highest AIS scores in each region <sup>16</sup>.

Patient characteristics, clinical outcome variables, and vehicular crash-related factors, were compared before and after the BAC limit change using the Chi-square test, Student's *t*-test and Mann-Whiney U-test. Differences in characteristics between patients in DUI (BAC  $\geq 30$  mg/dL) and non-DUI groups were also examined. Parameters were presented as numbers (percentage), median  $\pm$  interquartile range (IQR), or mean  $\pm$  standard deviation (SD). Logistic regression was used to define changes in baseline traits and clinical outcomes in the DUI and non-DUI groups before and after the BAC limit change. Breslow-Day statistics testing was performed to examine homogeneity in different stratifications. We also analyzed the ratio of single-vehicle nighttime (SVN) crashes to multiple-vehicle daytime (MVD) crashes as a proxy measure used in many studies for alcohol involvement <sup>17,18</sup>. R Statistical Software (Version 3.3.3) was used to geographically present the change in DUI event density in southern Taiwan, and demonstrate the monthly trend in the number of DUI patients from 2009 to 2016. All other analyses were performed using SAS software (Version 9.4). Statistical significance was defined as  $p < 0.05$ .

## RESULTS

The average age at the time of crash was  $43.68 \pm 18.70$  (range: 11-90 years). Of these patients, 642 (8.6%) were classified as DUI (BAC  $\geq 30$  mg/dL). Most crashes



1  
2  
3 were with a motorcycle vehicle (7,237 patients; 97.2%), and occurred between 6 AM  
4 – 2 PM (3,173 patients; 42.6%). Motorcyclists were wearing a helmet at the time of  
5 the crash in 88.93% (n = 7,237) of the patients, whereas 63.81% (n = 134) of car  
6 drivers had airbag protection. The average mortality was 1.34%, and median hospital  
7 LOS was six days.  
8  
9  
10  
11  
12  
13  
14  
15  
16

17 As shown in Table 1, 3,395 patients were admitted to our hospital before the  
18 BAC limit change, and 4,052 patients after. In both time periods, patients tended to be  
19 males between the ages of 40-45. The percentage of DUI patients significantly  
20 declined from 10.99% (n = 373) to 6.64% (n = 269) after the BAC limit change  
21 (Figure 1), and the average BAC at admission decreased from 21.19 mg/dL to 12.31  
22 mg/dL. This trend was observed across different regions in southern Taiwan, as  
23 shown in Figure 2. The percentage of airbag use in car crashes decreased, while  
24 helmet use in motorcycle crashes increased. No significant changes in mortality and  
25 hospital stay were found in our analyses. Patient numbers did not vary by season or  
26 day of the week, although a slight decrease was observed in the spring before the  
27 BAC limit change.  
28  
29  
30  
31  
32  
33  
34  
35  
36  
37  
38  
39  
40  
41  
42  
43  
44

45 Examination of patient characteristics, crash-related factors, and clinical  
46 outcomes in DUI and non-DUI patients revealed that patients in the DUI group were  
47 mostly male (88.47%) compared to the non-DUI group (55.94%) (Table 2). Patients  
48 in the DUI group were significantly younger (p <0.001). Reduced use of airbags in  
49 car crashes and helmets in motorcycle crashes were found in higher proportion in the  
50 DUI group than in the non-DUI group. DUI patients tended to have significantly  
51 higher ISS (13 vs. 9, p <0.001) and longer hospital stay (8 days vs. 6 days, p <0.001)  
52  
53  
54  
55  
56  
57  
58  
59  
60

1  
2  
3 than non-DUI patients. A significantly higher mortality rate was found in DUI  
4 patients than in non-DUI (4.67% vs. 1.03%,  $p < 0.001$ ). No significant seasonal  
5 differences were found between the groups. Time of visit to the ER differed for the  
6 DUI patients compared to the non-DUI patients. Most DUI patients visited the ER  
7 between 10 PM and 6 AM (50.31%), while only 13.33% of non-DUI patients visited  
8 at this time. Additionally, DUI crashes tended to occur on weekends (18.69% on  
9 Saturday and 19.31% on Sunday).

10  
11  
12  
13  
14  
15  
16  
17  
18  
19  
20  
21 Table 3 compares odds ratios (OR) for different stratified parameters before and  
22 after the BAC limit change. Males still showed increased odds of DUI (Crude OR:  
23 6.01, 95% CI: 4.69-7.69), but the BAC limit change showed no significant effect on  
24 DUI behavior between genders. DUI behavior increased the crash mortality risk  
25 before the BAC limit change, (OR: 4.33, 95% CI: 2.20-8.54), and even more so after  
26 (OR: 5.60, 95% CI: 3.16-9.93). The difference in these ORs was not significant ( $p =$   
27 0.568). Regarding time of crash, a greater number of DUI patients appeared between  
28 10 PM and 6 AM (OR 12.70) than between 2 PM and 10 PM (3.04) and between 6  
29 AM and 2 PM (baseline). This trend was significantly increased after the BAC limit  
30 change, which showed ORs of 20.76 and 5.50, respectively. There was no significant  
31 correlation between airbag use and DUI behavior in car crashes (OR 0.49, 95% CI:  
32 0.20-1.18) before the change in BAC limit. However, car crashes with airbag use  
33 were less frequent in DUI patients than in non-DUI patients after the BAC limit  
34 change (OR: 0.30, 95% CI: 0.10-0.88), with a significantly negative correlation.  
35 Similar results were found in motorcycle crashes. Helmet use in motorcycle crashes  
36 was a protective factor with a negative correlation to DUI behavior. This negative  
37 correlation was reinforced by the change in BAC limit. The OR of helmet use and  
38  
39  
40  
41  
42  
43  
44  
45  
46  
47  
48  
49  
50  
51  
52  
53  
54  
55  
56  
57  
58  
59  
60

1  
2  
3 DUI was 0.42 (95% CI: 0.32-0.55) before the change and 0.30 (95% CI: 0.15-0.26)  
4  
5 after, with significant difference between them ( $p < 0.001$ ). Season of crash had no  
6  
7 effect on DUI behavior either before or after the BAC limit change. Workdays were  
8  
9 significantly negatively correlated with DUI behavior as compared to weekends  
10  
11 (Saturday and Sunday) both before and after BAC limit change. In addition, the  
12  
13 SVN/MVD ratio significantly dropped to 0.48 from 0.60 after the change in BAC  
14  
15 limit was implemented, indicating that the change had the effect of reducing DUI  
16  
17 behavior.  
18  
19  
20  
21  
22  
23

24 The AIS of different regions were examined in DUI and non-DUI patients, and  
25  
26 indicated that DUI patients were more likely to sustain injuries to the head and neck,  
27  
28 face, thorax, and abdomen than non-DUI patients (Table 4). No significant difference  
29  
30 was found in external injuries between DUI and non-DUI patients. However, patients  
31  
32 with DUI were less likely than non-DUI patients to suffer from severe injury to the  
33  
34 extremities.  
35  
36  
37  
38  
39  
40  
41  
42  
43  
44  
45  
46  
47  
48  
49  
50  
51  
52  
53  
54  
55  
56  
57  
58  
59  
60

## DISCUSSION

Our analyses presented various factors associated with DUI behavior, including gender, mortality, time of day and day of week of the crash, use of airbags in cars, and use of helmets in motorcyclists. In this study, females accounted for a minor proportion (12%) of DUI patients, consistent with previous research<sup>19</sup>. Complex causal relationships in physiological and social factors may account for the difference in males and females involved in DUI. Our previous studies also reported more males than females with vehicular crashes sent to our emergency room<sup>14,20</sup>. Compared to females, males had a higher risk of motorcycle crashes<sup>21,22</sup>, which accounted for approximately 60% of injuries in southern Taiwan<sup>14,20</sup>. Male/female differences in alcoholic liver injury<sup>23</sup>, alcohol-induced brain injury<sup>24</sup>, and alcohol-related behavioral and medical problems have also been reported<sup>25-27</sup>. Increased vehicle performance and a higher number of safety features lead to greater risk-taking behavior by the driver<sup>28</sup>, and our results indicated that drivers using airbags in their vehicles show a significantly lower OR of being in a DUI crash. Although the decreased use of airbags may be due to the fact that DUI drivers tend to drive older vehicles, not wear a safety belt, and drive over the speed limit, this finding could indicate a relationship between the value placed on safety (e.g., purchase cars with more safety features) and the avoidance of risk-taking behaviors such as DUI. Our study also examined helmet use in motorcyclists, which has been mandatory for motorcyclists in Taiwan since June 1997; helmets were used by 90% of patients driving a motorcycle in this study. Previous studies have reported helmet use to be a protective factor or strong predictor of motorcycle crashes<sup>21,29-31</sup>. Our study also found that helmet use plays a significantly protective role in DUI crashes, supporting findings from Ohio, USA and Iran that suggest that motorcyclists involved in

1  
2  
3 alcohol-involved crashes are significantly less likely to wear a helmet <sup>32,33</sup>. The  
4  
5 decreased helmet use rate in our data may have contributed to the higher mortality  
6  
7 that we saw in DUI motorcycle drivers after the legal BAC limit was lowered to 30  
8  
9 mg/dL.  
10  
11  
12  
13

14  
15 Our analysis is consistent with findings in Taiwan based on national statistics <sup>13</sup>  
16  
17 that report a significant reduction in DUI events after the BAC limit change. Previous  
18  
19 studies report reductions in both crashes and fatalities when legal limits for BAC are  
20  
21 lowered to 50 mg/dL <sup>34,35</sup>. A significant decrease of 3.7% (95% CI: 0.9–6.5%) in  
22  
23 fatally injured drivers with a BAC level equal to or greater than 50 mg/dL was found  
24  
25 following the change <sup>36</sup>. A recent meta-analysis examined the impact of lowering the  
26  
27 legal BAC limit to 50 mg/dL, and found an 11.1% decrease in rates of fatal  
28  
29 alcohol-related crashes <sup>37</sup>. In this study, the proportion of male and female DUI  
30  
31 patients and overall mortality rate did not change after the legal limit change.  
32  
33 However, while the proportion of males and females did not change, other elements in  
34  
35 patient characteristics changed in our study after the legal BAC was lowered to 30  
36  
37 mg/dL: the percentage of DUI patients significantly decreased from 10.99% to 6.6%  
38  
39 and average BAC at admission decreased from 21.19 mg/dL to 12.31 mg/dL. The  
40  
41 decline in DUI events can be seen in the different geographical regions of Kaohsiung  
42  
43 and Pingtung surrounding our hospital. Time of injury appears to play a role in  
44  
45 severity of injury. It has been reported that drivers not under the influence of alcohol  
46  
47 suffer more severe injuries between midnight and early morning compared to early  
48  
49 night-time <sup>38</sup>. Findings from other studies have indicated that injuries involving  
50  
51 alcohol-intoxicated drivers are influenced less by geographic and environmental  
52  
53 factors than by the nature of collision and time of crash <sup>39</sup>. Our results indicate  
54  
55  
56  
57  
58  
59  
60

1  
2  
3 different temporal distribution (in weekday and time of day, but not in seasons) in the  
4  
5  
6  
7  
8  
9  
10  
11  
12  
13  
14  
15  
16  
17  
18  
19  
20  
21  
22  
23  
24  
25  
26  
27  
28  
29  
30  
31  
32  
33  
34  
35  
36  
37  
38  
39  
40  
41  
42  
43  
44  
45  
46  
47  
48  
49  
50  
51  
52  
53  
54  
55  
56  
57  
58  
59  
60

different temporal distribution (in weekday and time of day, but not in seasons) in the DUI and non-DUI groups. Most non-DUI patients visited the ER between early morning and afternoon (6 AM – 2 PM), but DUI patients tend to search for medical aid between 10 PM to 6 AM (50.31%). A previous study in Hong Kong indicated a similar temporal pattern in DUI using a slightly different time framework <sup>40</sup>. This study found that most DUI events occurred between 3 PM – 11 PM (39.5%) and 11 PM - 7 AM (29.8%). Consistent with our findings, a higher prevalence of DUI on weekends than on weekdays is reported in other studies <sup>41</sup>. In addition, the significant drop in SVN/MVD ratio after the legal BAC limit was lowered indicated that the limit change had an effect on the reduction in DUI behavior.

Although our study found that DUI events significantly decreased after the legal BAC limit was lowered, the increased point estimate for OR of DUI on mortality was not significant. Moreover, in DUI patients, the post-limit change mortality OR was significantly higher than pre-limit change. This may be explained by the possibility that DUI drivers after the change were more addicted to alcohol and had a lower helmet use rate. Studies have shown that alcohol impairs driving ability, and that the intoxicated driver is more likely to cause fatal road traffic crashes <sup>42</sup>, while other research has found the risk of mortality is not higher in patients with positive BAC <sup>3</sup>. Some studies have found that serum ethanol is independently associated with increased mortality <sup>43,44</sup>. Furthermore, some studies have proposed alcohol use can have a protective effect in trauma patients <sup>3,45,46</sup>. In this study, we did not find a protective role for DUI in our analysis of the association between DUI and AIS. These findings indicated that lowering the legal BAC limit can reduce alcohol-impaired driving <sup>47,48</sup>, but may be not enough to result in a significant

1  
2  
3 reduction in mortality of those trauma patients. This may indicate that other  
4 preventative policies, such as taxes on alcohol, minimum legal drinking ages, and  
5 administrative license revocation, should be considered <sup>49</sup>. In fact, drivers with or  
6 without DUI had more heterogeneity in the factors that may affect injury severity <sup>50</sup>.  
7  
8 Bias may exist in the analysis with multivariate logistic regression for the association  
9 between the injury severity and the drivers with or without DUI, which may comprise  
10 a limitation in this study.  
11  
12  
13  
14  
15  
16  
17  
18  
19  
20  
21

22 There are some other limitations to our study. First, the analysis was based on  
23 data from the trauma registry system of a level I regional trauma center in southern  
24 Taiwan. These results may not be externally valid. Besides, our selected statistical  
25 methods with limited parameters may not clarify the contributing factors and  
26 outcomes of DUI crashes due to its complex interaction <sup>51</sup>. Second, there were  
27 differences in the baseline characteristics of patients admitted after traffic crashes  
28 before and after sanction change. The differences in baseline characteristics may have  
29 confounded results and observed differences may have implied the effect of sanction  
30 change. Third, the combined use of psychoactive medication and alcohol may  
31 increase the risk of having a crash <sup>52,53</sup>. This confounder was not controlled in our  
32 study, although this bias is random. Fourth, patients seeking medical care due to a  
33 traffic crash did not routinely receive a blood alcohol test unless they showed  
34 symptoms of being alcohol-impaired or unconsciousness. This may underestimate the  
35 effect of DUI in our analysis. Fifth, our registry system is not able to report exact time  
36 elapsed from injury to an alcohol test. However, the mean transport time for the  
37 patients transported by emergency medical service to the hospital was  $18.3 \pm 7.9$  min  
38 according to our data and approximately 12 min according to Taiwan government  
39  
40  
41  
42  
43  
44  
45  
46  
47  
48  
49  
50  
51  
52  
53  
54  
55  
56  
57  
58  
59  
60

1  
2  
3 data from January 2009 to June 2009. Thus, the bias may be minimal. In addition,  
4  
5 driver use of safety belt was not registered in the trauma database, so we could not  
6  
7 investigate this important variable. Furthermore, our registry system did not exclude  
8  
9 the repeated DUI patients; although these drivers may be a small group in our study  
10  
11 subjects, they may confound our statistical results. Finally, there may exist bias in the  
12  
13 outcome assessment with control of alcohol consumption, vehicle miles travelled, and  
14  
15 vehicles and motorcycles registered, which were lacking in the registered trauma  
16  
17 database.  
18  
19  
20  
21  
22

## 23 24 **CONCLUSION**

25  
26 This study revealed that lowering the legal limit for BAC to 30 mg/dL  
27  
28 significantly reduced DUI events, but failed to result in a significant reduction in  
29  
30 traffic crash mortality. Airbag use in car crashes and helmet use in motorcycle crashes  
31  
32 after the limit change was less in DUI patients than in non-DUI patients, with  
33  
34 significant negative correlation.  
35  
36  
37  
38  
39

## 40 41 **ACKNOWLEDGEMENTS**

42 We thank the Biostatistics Center at the Kaohsiung Chang Gung Memorial Hospital  
43  
44 for their help with the statistical analysis.  
45  
46  
47  
48

## 49 50 **FUNDING**

51 This research was supported by a grant from Chang Gung Memorial Hospital  
52  
53 CGRPG8F0011.  
54  
55  
56  
57

## 58 59 **AUTHOR CONTRIBUTIONS**



1  
2  
3 Y.-C.T. wrote the manuscript, S.-C.W. revised the manuscript, J.-F.H. assisted with  
4 the study design, S.C.H. K. was involved in the literature review, C.-S.R. was  
5 responsible for the integrity of registered data, P.-C.C performed the statistical  
6 analyses and edited the tables, H.-Y.H. proofread the manuscript, and C.-H.H.  
7 designed the study and contributed to the data analysis and interpretation. All authors  
8 read and approved the final manuscript.  
9  
10  
11  
12  
13  
14  
15  
16  
17  
18

### 19 **CONFLICTS OF INTEREST**

20 The authors declare no conflict of interest.  
21  
22  
23  
24  
25

### 26 **DATA SHARING**

27 No additional data are available.  
28  
29  
30  
31  
32

### 33 **REFERENCES**

- 34 1. World Health Organization. Global status report on road safety. 2015.
- 35 2. World Health Organization. World report on road traffic injury prevention. 2004.
- 36 3. Hsieh CH, Su LT, Wang YC, et al. Does alcohol intoxication protect patients  
37 from severe injury and reduce hospital mortality? The association of alcohol  
38 consumption with the severity of injury and survival in trauma patients. *Am Surg.*  
39 2013;79(12):1289-1294.
- 40 4. Lee MH, Mello MJ, Reinert S. Emergency department charges for evaluating  
41 minimally injured alcohol-impaired drivers. *Ann Emerg Med.*  
42 2009;54(4):593-599.
- 43 5. Martin TL, Solbeck PA, Mayers DJ, et al. A review of alcohol-impaired driving:  
44 the role of blood alcohol concentration and complexity of the driving task. *J*  
45  
46  
47  
48  
49  
50  
51  
52  
53  
54  
55  
56  
57  
58  
59  
60

- 1  
2  
3 *Forensic Sci.* 2013;58(5):1238-1250.  
4  
5  
6 6. O'Keeffe T, Rhee P, Shafi S, et al. Alcohol use increases diagnostic testing,  
7  
8 procedures, charges, and the risk of hospital admission: a population-based study  
9  
10 of injured patients in the emergency department. *Am J Surg.* 2013;206(1):16-22.  
11  
12  
13 7. Blomberg RD, Peck RC, Moskowitz H, et al. The Long Beach/Fort Lauderdale  
14  
15 relative risk study. *J Safety Res.* 2009;40(4):285-292.  
16  
17  
18 8. Fell JC, Voas RB. The effectiveness of a 0.05 blood alcohol concentration (BAC)  
19  
20 limit for driving in the United States. *Addiction.* 2014;109(6):869-874.  
21  
22  
23 9. Taylor B, Irving HM, Kanteres F, et al. The more you drink, the harder you fall: a  
24  
25 systematic review and meta-analysis of how acute alcohol consumption and  
26  
27 injury or collision risk increase together. *Drug Alcohol Depend.*  
28  
29 2010;110(1-2):108-116.  
30  
31  
32 10. Taylor B, Rehm J. The relationship between alcohol consumption and fatal motor  
33  
34 vehicle injury: high risk at low alcohol levels. *Alcohol Clin Exp Res.*  
35  
36 2012;36(10):1827-1834.  
37  
38  
39 11. Thomas F. Babor. Alcohol: no ordinary commodity--a summary of the second  
40  
41 edition. *Addiction.* 2010;105(5):769-779.  
42  
43  
44 12. Ministry of Interior ROCM. Statistics of Police Administration. 2018.  
45  
46  
47 13. Chan YS, Chen CS, Huang L, Peng YI. Sanction changes and drunk-driving  
48  
49 injuries/deaths in Taiwan. *Accid Anal Prev.* 2017;107(10):102-109.  
50  
51  
52 14. Hsieh CH, Hsu SY, Hsieh HY, Chen YC. Differences between the sexes in  
53  
54 motorcycle-related injuries and fatalities at a Taiwanese level I trauma center.  
55  
56 *Biomed J.* 2017;40(2):113-120.  
57  
58  
59 15. Hsieh CH, Liu HT, Hsu SY, et al. Motorcycle-related hospitalizations of the  
60  
elderly. *Biomed J.* 2017;40(2):121-128.

- 1  
2  
3 16. Hsieh CH, Chen YC, Hsu SY, et al. Defining polytrauma by abbreviated injury  
4 scale  $\geq 3$  for a least two body regions is insufficient in terms of short-term  
5  
6 outcome: A cross-sectional study at a level I trauma center. *Biomed J.*  
7  
8 2018;41(5):321-327.  
9
- 10  
11  
12 17. Voas RB, Romano E, Peck R. Validity of surrogate measures of alcohol  
13 involvement when applied to nonfatal crashes. *Accid Anal Prev.*  
14  
15 2009;41(3):522-530.  
16
- 17  
18  
19 18. Heeren T, Smith RA, Morelock S, Hingson RW. Surrogate measures of alcohol  
20 involvement in fatal crashes: Are conventional indicators adequate? *J Safety Res.*  
21  
22 1985;16(3):127-133.  
23
- 24  
25  
26 19. Maxwell JC, Freeman J. Gender differences in DUI offenders in treatment in  
27 Texas. *Traffic Inj Prev.* 2007;8(4):353-360.  
28
- 29  
30  
31 20. Tang CE, Liu HT, Kuo PJ, et al. Impact of Sexual Dimorphism on Trauma  
32 Patterns and Clinical Outcomes of Patients with a High-Risk Score of the  
33  
34 Osteoporosis Self-Assessment Tool for Asians: A Propensity Score-Matched  
35  
36 Analysis. *Int J Environ Res Public Health.* 2018;15(3): E418.  
37
- 38  
39  
40 21. Apidechkul T, Laingoen O, Suwannaporn S, Tamornpark R. Factors Influencing  
41  
42 Motorcycle Accidents among Hill Tribe Youths in Chiang Rai, Thailand. *Thai J*  
43  
44 *Health Res.* 2017;31(6):473-480.  
45
- 46  
47  
48 22. Mbanjumucyo G, George N, Kearney A, et al. Epidemiology of injuries and  
49 outcomes among trauma patients receiving prehospital care at a tertiary teaching  
50  
51 hospital in Kigali, Rwanda. *Afr J Emerg Med.* 2016;6(4):191-197.  
52
- 53  
54  
55 23. Eagon PK. Alcoholic liver injury: Influence of gender and hormones. *World J*  
56  
57 *Gastroenterol.* 2010;16(11):1377.  
58
- 59  
60 24. Hommer DW. Male and female sensitivity to alcohol-induced brain damage.

- 1  
2  
3 *Alcohol Res Health.* 2003;27(2):181-185.  
4  
5  
6 25. Bradley KA, Badrinath S, Bush K, et al. Medical risks for women who drink  
7 alcohol. *J Gen Intern Med.* 1998;13(9):627-639.  
8  
9  
10 26. Nolen-Hoeksema S. Gender differences in risk factors and consequences for  
11 alcohol use and problems. *Clin Psychol Rev.* 2004;24(8):981-1010.  
12  
13  
14 27. Nolen-Hoeksema S, Hilt L. Possible contributors to the gender differences in  
15 alcohol use and problems. *J Gen Psychol.* 2006;133(4):357-374.  
16  
17  
18 28. Horswill MS, Coster ME. The effect of vehicle characteristics on drivers'  
19 risk-taking behaviour. *Ergonomics.* 2002;45(2):85-104.  
20  
21  
22 29. Buckley L, Bingham CR, Flannagan CA, et al. Observation of motorcycle helmet  
23 use rates in Michigan after partial repeal of the universal motorcycle helmet law.  
24  
25  
26 *Accid Anal Prev.* 2016;95(Pt A):178-186.  
27  
28  
29 30. Kuo SCH, Kuo PJ, Rau CS, et al. The protective effect of helmet use in  
30 motorcycle and bicycle accidents: a propensity score-matched study based on a  
31 trauma registry system. *BMC Public Health.* 2017;17(1):639.  
32  
33  
34 31. Lin KC, Peng SH, Kuo PJ, et al. Patterns Associated with Adult Mandibular  
35 Fractures in Southern Taiwan-A Cross-Sectional Retrospective Study. *Int J*  
36  
37  
38 *Environ Res Public Health.* 2017;14(7).  
39  
40  
41 32. Heydari ST, Vossoughi M, Akbarzadeh A, et al. Prevalence and risk factors of  
42 alcohol and substance abuse among motorcycle drivers in Fars province, Iran.  
43  
44  
45 *Chin J Traumatol.* 2016;19(2):79-84.  
46  
47  
48 33. Maistros A, Schneider WHt, Savolainen PT. A comparison of contributing  
49 factors between alcohol related single vehicle motorcycle and car crashes. *J*  
50  
51  
52 *Safety Res.* 2014;49:129-135.  
53  
54  
55 34. Hingson R, Fau. HT, Winter M. Effects of Maine's 0.05% legal blood alcohol  
56  
57  
58  
59  
60

- 1  
2  
3 level for drivers with DWI convictions. *Public Health Rep.* 1998;113(5):440-446.  
4  
5  
6 35. Homel R. Drink-driving law enforcement and the legal blood alcohol limit in  
7  
8 New South Wales. *Accid Anal Prev.* 1994;26(2):147-155.  
9  
10  
11 36. Blais E, Bellavance F, Marcil A, Carnis L. Effects of introducing an  
12  
13 administrative .05% blood alcohol concentration limit on law enforcement  
14  
15 patterns and alcohol-related collisions in Canada. *Accid Anal Prev.*  
16  
17 2015;82:101-111.  
18  
19  
20 37. Fell JC, Scherer M. Estimation of the Potential Effectiveness of Lowering the  
21  
22 Blood Alcohol Concentration (BAC) Limit for Driving from 0.08 to 0.05 Grams  
23  
24 per Deciliter in the United States. *Alcohol Clin Exp Res.* 2017;41(12):2128-2139.  
25  
26  
27 38. Chen H, Chen Q, Chen L, Zhang G. Analysis of risk factors affecting driver  
28  
29 injury and crash injury with drivers under the influence of alcohol (DUI) and  
30  
31 non-DUI. *Traffic Inj Prev.* 2016;17(8):796-802.  
32  
33  
34 39. Velmurugan S, Padma S, Madhu E, et al. A study of factors influencing the  
35  
36 severity of road crashes involving drunk drivers and non drunk drivers. *Res*  
37  
38 *Transport Econ.* 2013;38(1):78-83.  
39  
40  
41 40. Li YC, Sze NN, Wong SC. Spatial-temporal analysis of drink-driving patterns in  
42  
43 Hong Kong. *Accid Anal Prev.* 2013;59:415-424.  
44  
45  
46 41. Damsere-Derry J, Palk G, King M. Prevalence of alcohol-impaired driving and  
47  
48 riding in northern Ghana. *Traffic Inj Prev.* 2016;17(3):226-232.  
49  
50  
51 42. Impinen A, Makela P, Karjalainen K, et al. High mortality among people  
52  
53 suspected of drunk-driving. An 18-year register-based follow-up. *Drug Alcohol*  
54  
55 *Depend.* 2010;110(1-2):80-84.  
56  
57  
58 43. Pories SE, Gamelli RL, Vacek P, et al. Intoxication and injury. *J Trauma.*  
59  
60 1992;32(1):60-64.

- 1  
2  
3 44. Luna GK, Maier RV, Sowder L, et al. The influence of ethanol intoxication on  
4  
5 outcome of injured motorcyclists. *J Trauma*. 1984;24(8):695-700.  
6  
7  
8 45. Cherry RA, Nichols PA, Snaveley TM, et al. Resource utilization and outcomes of  
9  
10 intoxicated drivers. *J Trauma Manag Outcomes*. 2010;4:9.  
11  
12 46. Plurad D, Demetriades D, Gruzinski G, et al. Motor vehicle crashes: the  
13  
14 association of alcohol consumption with the type and severity of injuries and  
15  
16 outcomes. *J Emerg Med*. 2010;38(1):12-17.  
17  
18 47. Bachmann M, Dixon AL. DWI Sentencing in the United States: Toward  
19  
20 Promising Punishment Alternatives in Texas. *Int J Crim Just Sci*.  
21  
22 2014;9(2):181-191.  
23  
24  
25 48. Yao J, Johnson MB, Beck KH. Predicting DUI decisions in different legal  
26  
27 environments: investigating deterrence with a conjoint experiment. *Traffic Inj*  
28  
29 *Prev*. 2014;15(3):213-221.  
30  
31  
32 49. Chang K, Wu CC, Ying YH. The effectiveness of alcohol control policies on  
33  
34 alcohol-related traffic fatalities in the United States. *Accid Anal Prev*.  
35  
36 2012;45:406-415.  
37  
38  
39 50. Behnood ALF. The effects of drug and alcohol consumption on driver-injury  
40  
41 severities in single-vehicle crashes. *Traffic Inj Prev*. 2017;18(5):456-462.  
42  
43  
44 51. Behnood A, Roshandeh AM, Mannering FL. Latent class analysis of the effects  
45  
46 of age, gender, and alcohol consumption on driver-injury severities. *Anal*  
47  
48 *Methods Accid Res*. 2014;3-4:56-91.  
49  
50  
51 52. Bogstrand ST, Gjerde H, Normann PT, et al. Alcohol, psychoactive substances  
52  
53 and non-fatal road traffic accidents--a case-control study. *BMC Public Health*.  
54  
55 2012;12:734.  
56  
57  
58 53. Ricci G, Majori S, Mantovani W, et al. Prevalence of alcohol and drugs in urine  
59  
60

1  
2  
3 of patients involved in road accidents. *J Prev Med Hyg.* 2008;49(2):89-95.  
4  
5  
6  
7  
8  
9  
10  
11  
12  
13  
14  
15  
16  
17  
18  
19  
20  
21  
22  
23  
24  
25  
26  
27  
28  
29  
30  
31  
32  
33  
34  
35  
36  
37  
38  
39  
40  
41  
42  
43  
44  
45  
46  
47  
48  
49  
50  
51  
52  
53  
54  
55  
56  
57  
58  
59  
60

For peer review only

Table 1. Patient characteristics, clinical variables, and vehicular crash-related variables before and after BAC limit change.

|                      | Before BAC<br>limit change | After BAC limit<br>change | <i>p</i>            |
|----------------------|----------------------------|---------------------------|---------------------|
| Gender, n (%)        |                            |                           | 0.028               |
| Male                 | 2,041 (60.12%)             | 2,334 (57.6%)             |                     |
| Female               | 1,354 (39.88%)             | 1,718 (42.4%)             |                     |
| Age (years)          | 42.77 (18.34)              | 44.45 (18.97)             | <0.001 <sup>a</sup> |
| DUI, n (%)           |                            |                           | <0.001              |
| Yes                  | 373 (10.99%)               | 269 (6.64%)               |                     |
| No                   | 3,022 (89.01%)             | 3,783 (93.36%)            |                     |
| BAC (mg/dL)          | 21.19 (62.49)              | 12.31 (47.12)             | <0.001 <sup>a</sup> |
| Car, n (%)           |                            |                           | 0.057               |
| Airbag               | 73 (70.19%)                | 61 (57.55%)               |                     |
| No airbag            | 31 (29.81%)                | 45 (42.45%)               |                     |
| Motorcycle, n (%)    |                            |                           | <0.001              |
| Helmet               | 2,876 (87.39%)             | 3,560 (90.22%)            |                     |
| No Helmet            | 415 (12.61%)               | 386 (9.78%)               |                     |
| ISS                  | 9 (9)                      | 9 (9)                     | 0.041 <sup>a</sup>  |
| Hospital stay (days) | 6 (7)                      | 7 (8)                     | 0.198 <sup>a</sup>  |
| Mortality, n (%)     |                            |                           | 0.125               |
| Alive                | 3,357 (98.88%)             | 3,990 (98.47%)            |                     |
| Death                | 38 (1.12%)                 | 62 (1.53%)                |                     |
| Seasons, n (%)       |                            |                           | <0.001              |
| Spring               | 605 (17.82%)               | 994 (24.53%)              |                     |
| Summer               | 874 (25.74%)               | 1,008 (24.88%)            |                     |



|    |                 |                |                |        |
|----|-----------------|----------------|----------------|--------|
| 1  | Autumn          | 970 (28.57%)   | 962 (23.74%)   |        |
| 2  | Winter          | 946 (27.86%)   | 1,088 (26.85%) |        |
| 3  |                 |                |                |        |
| 4  |                 |                |                |        |
| 5  | Time, n (%)     |                |                | <0.001 |
| 6  |                 |                |                |        |
| 7  | 6AM - 2PM       | 1,351 (39.79%) | 1,822 (44.97%) |        |
| 8  |                 |                |                |        |
| 9  | 2PM - 10PM      | 1,436 (42.30%) | 1,608 (39.68%) |        |
| 10 |                 |                |                |        |
| 11 | 10PM - 6AM      | 608 (17.91%)   | 622 (15.35%)   |        |
| 12 |                 |                |                |        |
| 13 |                 |                |                |        |
| 14 | Weekdays, n (%) |                |                | 0.012  |
| 15 |                 |                |                |        |
| 16 | Monday          | 487 (14.34%)   | 639 (15.77%)   |        |
| 17 |                 |                |                |        |
| 18 | Tuesday         | 553 (16.29%)   | 558 (13.77%)   |        |
| 19 |                 |                |                |        |
| 20 | Wednesday       | 440 (12.96%)   | 587 (14.49%)   |        |
| 21 |                 |                |                |        |
| 22 | Thursday        | 494 (14.55%)   | 590 (14.56%)   |        |
| 23 |                 |                |                |        |
| 24 | Friday          | 480 (14.14%)   | 613 (15.13%)   |        |
| 25 |                 |                |                |        |
| 26 | Saturday        | 504 (14.85%)   | 582 (14.36%)   |        |
| 27 |                 |                |                |        |
| 28 | Sunday          | 437 (12.87%)   | 483 (11.92%)   |        |
| 29 |                 |                |                |        |
| 30 |                 |                |                |        |
| 31 |                 |                |                |        |

a

Mann-Whitney

test

Table 2. Patient characteristics, clinical variables, and crash-related variables in DUI (BAC  $\geq$ 30 mg/dL) and non-DUI patients.

|                      | DUI           | Non-DUI        | <i>p</i>            |
|----------------------|---------------|----------------|---------------------|
| Gender, n (%)        |               |                | <0.001              |
| Male                 | 568 (88.47%)  | 3,807 (55.94%) |                     |
| Female               | 74 (11.53%)   | 2,998 (44.06%) |                     |
| Age (years)          | 39.64 (12.76) | 44.07 (19.13)  | <0.001 <sup>a</sup> |
| Car, n (%)           |               |                | 0.020               |
| Airbag               | 25 (50.00%)   | 109 (68.13%)   |                     |
| No airbag            | 25 (50.00%)   | 51 (31.88%)    |                     |
| Motorcycle, n (%)    |               |                | <0.001              |
| Helmet               | 433 (73.14%)  | 6,003 (90.34%) |                     |
| No Helmet            | 159 (26.86%)  | 642 (9.66%)    |                     |
| ISS                  | 13 (14)       | 9 (7)          | <0.001 <sup>a</sup> |
| Hospital stay (days) | 8 (11)        | 6 (7)          | <0.001 <sup>a</sup> |
| Mortality, n (%)     |               |                | <0.001              |
| Alive                | 612 (95.33%)  | 6,735 (98.97%) |                     |
| Death                | 30 (4.67%)    | 70 (1.03%)     |                     |
| Seasons, n (%)       |               |                | 0.522               |
| Spring               | 135 (21.03%)  | 1,464 (21.51%) |                     |
| Summer               | 153 (23.83%)  | 1,729 (25.41%) |                     |
| Autumn               | 163 (25.39%)  | 1,769 (26.00%) |                     |
| Winter               | 191 (29.75%)  | 1,843 (27.08%) |                     |
| Time, n (%)          |               |                | <0.001              |
| 6AM - 2PM            | 70 (10.90%)   | 3,103 (45.60%) |                     |
| 2PM - 10PM           | 249 (38.79%)  | 2,795 (41.07%) |                     |

|    |                 |              |                |
|----|-----------------|--------------|----------------|
| 1  | 10PM - 6AM      | 323 (50.31%) | 907 (13.33%)   |
| 2  |                 |              |                |
| 3  | Weekdays, n (%) |              | <0.001         |
| 4  |                 |              |                |
| 5  | Monday          | 81 (12.62%)  | 1,045 (15.36%) |
| 6  |                 |              |                |
| 7  | Tuesday         | 72 (11.21%)  | 1,039 (15.27%) |
| 8  |                 |              |                |
| 9  | Wednesday       | 85 (13.24%)  | 942 (13.84%)   |
| 10 |                 |              |                |
| 11 | Thursday        | 79 (12.31%)  | 1,005 (14.77%) |
| 12 |                 |              |                |
| 13 | Friday          | 81 (12.62%)  | 1,012 (14.87%) |
| 14 |                 |              |                |
| 15 | Saturday        | 120 (18.69%) | 966 (14.20%)   |
| 16 |                 |              |                |
| 17 | Sunday          | 124 (19.31%) | 796 (11.70%)   |
| 18 |                 |              |                |
| 19 |                 |              |                |

---

<sup>a</sup> Mann-Whitney test

Table 3. Homogeneity analysis of variables related to DUI before and after BAC limit change.

|                  | Before BAC limit change |               |                    | After BAC limit change |               |                        | Crude OR<br>(95% CI) | <i>p</i> |
|------------------|-------------------------|---------------|--------------------|------------------------|---------------|------------------------|----------------------|----------|
|                  | DUI                     | Non-DUI       | OR (95% CI)        | DUI                    | Non-DUI       | OR (95% CI)            |                      |          |
| Gender, n (%)    |                         |               |                    |                        |               |                        |                      |          |
| Male             | 331 (9.75%)             | 1710 (50.37%) | 6.05 (4.35-8.40)   | 237 (5.85%)            | 2097 (51.75%) | 5.96 (4.09-8.66)       | 6.01 (4.69-7.69)     | 0.952    |
| Female           | 42 (1.24%)              | 1312 (38.65%) |                    | 32 (0.79%)             | 1686 (41.61%) |                        |                      |          |
| Mortality, n (%) |                         |               |                    |                        |               |                        |                      |          |
| Alive            | 360 (10.60%)            | 2997 (88.28%) | 4.33 (2.20-8.54)   | 252 (6.22%)            | 3738 (92.25%) | 5.60 (3.16-9.93)       | 4.98 (3.21-7.73)     | 0.568    |
| Death            | 13 (0.38)               | 25 (0.74%)    |                    | 17 (0.42%)             | 45 (1.11%)    |                        |                      |          |
| Time, n (%)      |                         |               |                    |                        |               |                        |                      | <0.001   |
| 6AM – 2PM        | 46 (12.33%)             | 1305 (43.18%) | 1                  | 24 (8.92%)             | 1798 (47.53%) | 1                      |                      |          |
| 2PM – 10PM       | 139 (37.27%)            | 1297 (42.92%) | 3.04 (2.16-4.28)   | 110 (40.89%)           | 1498 (39.60%) | 5.50 (3.52-8.60)       |                      |          |
| 10PM – 6AM       | 188 (50.40%)            | 420 (13.90%)  | 12.70 (9.03-17.85) | 135 (50.19%)           | 487 (12.87%)  | 20.76<br>(13.30-32.41) |                      |          |
| Car, n (%)       |                         |               |                    |                        |               |                        |                      |          |
| Airbag           | 19 (59.38%)             | 54 (75.00%)   | 0.49 (0.20-1.18)   | 6 (33.33%)             | 55 (62.50%)   | 0.30 (0.10-0.88)       |                      | 0.007    |
| No airbag        | 13 (40.63%)             | 18 (25.00%)   |                    | 12 (66.67%)            | 33 (37.50%)   |                        |                      |          |

|    |                                    |              |               |                  |              |               |                  |                  |
|----|------------------------------------|--------------|---------------|------------------|--------------|---------------|------------------|------------------|
| 1  |                                    |              |               |                  |              |               |                  |                  |
| 2  | Saturday                           | 72 (19.30%)  | 432 (14.30%)  | 0.83 (0.58-1.18) | 48 (17.84%)  | 534 (14.12%)  | 0.76 (0.50-1.15) |                  |
| 3  |                                    |              |               |                  |              |               |                  |                  |
| 4  | Motorcycle n (%)                   |              |               |                  |              |               |                  | <0.001           |
| 5  |                                    |              |               |                  |              |               |                  |                  |
| 6  | Helmet                             | 261 (76.54%) | 2615 (88.64%) | 0.42 (0.32-0.55) | 172 (68.53%) | 3388 (91.69%) | 0.20 (0.15-0.26) |                  |
| 7  |                                    |              |               |                  |              |               |                  |                  |
| 8  | No Helmet                          | 80 (23.46%)  | 335 (11.36%)  |                  | 79 (31.47%)  | 307 (8.31%)   |                  |                  |
| 9  |                                    |              |               |                  |              |               |                  |                  |
| 10 |                                    |              |               |                  |              |               |                  |                  |
| 11 | Seasons, n (%)                     |              |               |                  |              |               |                  | 0.456            |
| 12 |                                    |              |               |                  |              |               |                  |                  |
| 13 | Spring                             | 63 (16.89%)  | 542 (17.94%)  | 1                | 72 (26.77%)  | 922 (24.37%)  | 1                |                  |
| 14 |                                    |              |               |                  |              |               |                  |                  |
| 15 | Summer                             | 98 (26.27%)  | 776 (25.68%)  | 1.09 (0.78-1.52) | 55 (20.45%)  | 953 (25.19%)  | 0.74 (0.51-1.06) | 0.96 (0.75-1.22) |
| 16 |                                    |              |               |                  |              |               |                  |                  |
| 17 | Autumn                             | 94 (25.20%)  | 876 (28.99%)  | 0.92 (0.66-1.29) | 69 (25.65%)  | 893 (23.61%)  | 0.99 (0.70-1.39) | 1.00 (0.79-1.27) |
| 18 |                                    |              |               |                  |              |               |                  |                  |
| 19 | Winter                             | 118 (31.64%) | 828 (27.40%)  | 1.23 (0.89-1.70) | 73 (27.14%)  | 1015 (26.83%) | 0.92 (0.66-1.29) | 1.12 (0.89-1.42) |
| 20 |                                    |              |               |                  |              |               |                  |                  |
| 21 |                                    |              |               |                  |              |               |                  |                  |
| 22 | Weekdays, n (%)                    |              |               |                  |              |               |                  | <0.001           |
| 23 |                                    |              |               |                  |              |               |                  |                  |
| 24 | Sunday                             | 73 (19.57%)  | 364 (12.05%)  | 1                | 51 (18.96%)  | 432 (11.42%)  | 1                |                  |
| 25 |                                    |              |               |                  |              |               |                  |                  |
| 26 | Monday                             | 40 (10.72%)  | 447 (14.79%)  | 0.45 (0.30-0.67) | 41 (15.24%)  | 598 (15.81%)  | 0.58 (0.38-0.89) |                  |
| 27 |                                    |              |               |                  |              |               |                  |                  |
| 28 | Tuesday                            | 45 (12.06%)  | 508 (16.81%)  | 0.44 (0.30-0.66) | 27 (10.04%)  | 531 (14.04%)  | 0.43 (0.27-0.70) |                  |
| 29 |                                    |              |               |                  |              |               |                  |                  |
| 30 | Wednesday                          | 47 (12.60%)  | 393 (13.00%)  | 0.60 (0.40-0.88) | 38 (14.13%)  | 549 (14.51)   | 0.57 (0.38-0.91) |                  |
| 31 |                                    |              |               |                  |              |               |                  |                  |
| 32 | Thursday                           | 50 (13.40%)  | 444 (14.69%)  | 0.56 (0.38-0.83) | 29 (10.78%)  | 561 (14.83%)  | 0.44 (0.27-0.70) |                  |
| 33 |                                    |              |               |                  |              |               |                  |                  |
| 34 | Friday                             | 46 (12.33%)  | 434 (14.36%)  | 0.53 (0.36-0.78) | 35 (13.01%)  | 578 (15.28%)  | 0.51 (0.33-0.80) |                  |
| 35 |                                    |              |               |                  |              |               |                  |                  |
| 36 |                                    |              |               |                  |              |               |                  |                  |
| 37 |                                    |              |               |                  |              |               |                  |                  |
| 38 |                                    |              |               |                  |              |               |                  |                  |
| 39 | <sup>a</sup> Breslow-Day statistic |              |               |                  |              |               |                  |                  |
| 40 |                                    |              |               |                  |              |               |                  |                  |
| 41 |                                    |              |               |                  |              |               |                  |                  |
| 42 |                                    |              |               |                  |              |               |                  |                  |
| 43 |                                    |              |               |                  |              |               |                  |                  |
| 44 |                                    |              |               |                  |              |               |                  |                  |
| 45 |                                    |              |               |                  |              |               |                  |                  |
| 46 |                                    |              |               |                  |              |               |                  |                  |

Table 4. The distribution of Abbreviated Injury Scale (AIS) score by region in DUI (BAC  $\geq$ 30 mg/dL) and non-DUI patients.

|           | DUI          | Non-DUI       | OR (95% CI)       | <i>p</i> |
|-----------|--------------|---------------|-------------------|----------|
| Head/Neck |              |               |                   | < 0.0001 |
| 0         | 269 (41.90%) | 4799 (70.52%) | 1                 |          |
| 1         | 94 (14.64%)  | 638 (9.38%)   | 2.63 (2.05-3.37)  |          |
| 2         | 22 (3.43%)   | 105 (1.54%)   | 3.74 (2.32-6.02)  |          |
| 3         | 81 (12.62%)  | 506 (7.44%)   | 2.86 (2.19-3.72)  |          |
| 4         | 131 (20.40%) | 597 (8.77%)   | 3.92 (3.12-4.91)  |          |
| 5-6       | 45 (7.01%)   | 1160 (2.35%)  | 0.69 (0.50-0.96)  |          |
| Face      |              |               |                   | < 0.0001 |
| 0         | 361 (56.23%) | 5342 (78.50%) | 1                 |          |
| 1         | 64 (9.97%)   | 493 (7.24%)   | 1.921 (1.45-2.55) |          |
| 2         | 215 (33.49%) | 949 (13.95%)  | 3.353 (2.79-4.02) |          |
| 3         | 2 (0.31%)    | 21 (0.31%)    | 1.409 (0.33-6.03) |          |
| Thorax    |              |               |                   | < 0.0001 |
| 0         | 488 (76.01%) | 5640 (82.88%) | 1                 |          |
| 1         | 31 (4.83%)   | 220 (3.23%)   | 1.63 (1.11-2.40)  |          |
| 2         | 27 (4.21%)   | 306 (4.50%)   | 1.02 (0.681-1.53) |          |
| 3         | 57 (8.88%)   | 437 (6.42%)   | 1.51 (1.13-2.02)  |          |
| 4         | 37 (5.76%)   | 196 (2.88%)   | 2.18 (1.52-3.14)  |          |
| 5-6       | 2 (0.32%)    | 6 (0.08%)     | 3.85 (0.78-19.14) |          |
| Abdomen   |              |               |                   | < 0.0001 |
| 0         | 552 (85.98%) | 6319 (92.86%) | 1                 |          |
| 1         | 7 (1.09%)    | 38 (0.56%)    | 2.109 (0.94-4.74) |          |

|             |              |               |                   |
|-------------|--------------|---------------|-------------------|
| 2           | 42 (6.54%)   | 222 (3.26%)   | 2.166 (1.57-3.05) |
| 3           | 23 (3.58%)   | 141 (2.07%)   | 1.867 (1.19-2.93) |
| 4           | 13 (2.02%)   | 69 (1.01%)    | 2.157 (1.19-3.93) |
| 5           | 5 (0.78%)    | 16 (0.24%)    | 3.583 (1.31-9.81) |
| Extremities |              |               | < 0.0001          |
| 0           | 261 (40.65%) | 1839 (29.02%) | 1                 |
| 1           | 63 (9.81%)   | 435 (6.39%)   | 1.020 (0.76-1.37) |
| 2           | 185 (28.82%) | 2973 (43.69%) | 0.438 (0.36-0.53) |
| 3-5         | 133 (20.72%) | 1558 (22.89%) | 0.61 (0.48-0.75)  |
| 14          |              |               | 0.195             |
| 0           | 536 (83.49%) | 5799 (85.22%) | 1                 |
| 1           | 102 (15.89%) | 981 (14.42%)  | 1.125 (0.90-1.41) |
| 2           | 4 (0.62%)    | 25 (0.37%)    | 1.731 (0.60-4.99) |

### Figure legends

Figure 1. Monthly number of DUI (BAC  $\geq$ 30 mg/dL) patients before and after BAC limit change.

Figure 2. DUI (BAC  $\geq$ 30 mg/dL) event density over the 71 district areas of southern Taiwan (A, before BAC limit change; B, after BAC limit change).

1  
2  
3  
4  
5  
6  
7  
8  
9  
10  
11  
12  
13  
14  
15  
16  
17  
18  
19  
20  
21  
22  
23  
24  
25  
26  
27  
28  
29  
30  
31  
32  
33  
34  
35  
36  
37  
38  
39  
40  
41  
42  
43  
44  
45  
46  
47  
48  
49  
50  
51  
52  
53  
54  
55  
56  
57  
58  
59  
60



The monthly DUI patient number before (July 2009 to December 2012) and after (July 2013 to December 2016) sanction change with multivariate regression line

224x153mm (300 x 300 DPI)



1  
2  
3  
4  
5  
6  
7  
8  
9  
10  
11  
12  
13  
14  
15  
16  
17  
18  
19  
20  
21  
22  
23  
24  
25  
26  
27  
28  
29  
30  
31  
32  
33  
34  
35  
36  
37  
38  
39  
40  
41  
42  
43  
44  
45  
46  
47  
48  
49  
50  
51  
52  
53  
54  
55  
56  
57  
58  
59  
60



DUI event density over the 71 district areas of southern Taiwan (A. before sanction change; B. after sanction change)

350x273mm (300 x 300 DPI)

STROBE Statement—Checklist of items that should be included in reports of *cross-sectional studies*

|                              | <b>Item No</b> | <b>Recommendation</b>                                                                                                                                                                                        | <b>Page No</b> |
|------------------------------|----------------|--------------------------------------------------------------------------------------------------------------------------------------------------------------------------------------------------------------|----------------|
| <b>Title and abstract</b>    | 1              | (a) Indicate the study's design with a commonly used term in the title or the abstract                                                                                                                       | 2              |
|                              |                | (b) Provide in the abstract an informative and balanced summary of what was done and what was found                                                                                                          | 2              |
| <b>Introduction</b>          |                |                                                                                                                                                                                                              |                |
| Background/rationale         | 2              | Explain the scientific background and rationale for the investigation being reported                                                                                                                         | 4              |
| Objectives                   | 3              | State specific objectives, including any prespecified hypotheses                                                                                                                                             | 4              |
| <b>Methods</b>               |                |                                                                                                                                                                                                              |                |
| Study design                 | 4              | Present key elements of study design early in the paper                                                                                                                                                      | 6              |
| Setting                      | 5              | Describe the setting, locations, and relevant dates, including periods of recruitment, exposure, follow-up, and data collection                                                                              | 6              |
| Participants                 | 6              | (a) Give the eligibility criteria, and the sources and methods of selection of participants                                                                                                                  | 6              |
| Variables                    | 7              | Clearly define all outcomes, exposures, predictors, potential confounders, and effect modifiers. Give diagnostic criteria, if applicable                                                                     | 7              |
| Data sources/<br>measurement | 8*             | For each variable of interest, give sources of data and details of methods of assessment (measurement). Describe comparability of assessment methods if there is more than one group                         | 7              |
| Bias                         | 9              | Describe any efforts to address potential sources of bias                                                                                                                                                    | -              |
| Study size                   | 10             | Explain how the study size was arrived at                                                                                                                                                                    | 6              |
| Quantitative variables       | 11             | Explain how quantitative variables were handled in the analyses. If applicable, describe which groupings were chosen and why                                                                                 | 6              |
| Statistical methods          | 12             | (a) Describe all statistical methods, including those used to control for confounding                                                                                                                        | 7              |
|                              |                | (b) Describe any methods used to examine subgroups and interactions                                                                                                                                          | 7              |
|                              |                | (c) Explain how missing data were addressed                                                                                                                                                                  | 6              |
|                              |                | (d) If applicable, describe analytical methods taking account of sampling strategy                                                                                                                           | -              |
|                              |                | (e) Describe any sensitivity analyses                                                                                                                                                                        | 6              |
| <b>Results</b>               |                |                                                                                                                                                                                                              |                |
| Participants                 | 13*            | (a) Report numbers of individuals at each stage of study—eg numbers potentially eligible, examined for eligibility, confirmed eligible, included in the study, completing follow-up, and analysed            | 6              |
|                              |                | (b) Give reasons for non-participation at each stage                                                                                                                                                         | -              |
|                              |                | (c) Consider use of a flow diagram                                                                                                                                                                           | -              |
| Descriptive data             | 14*            | (a) Give characteristics of study participants (eg demographic, clinical, social) and information on exposures and potential confounders                                                                     | 8-10           |
|                              |                | (b) Indicate number of participants with missing data for each variable of interest                                                                                                                          | -              |
| Outcome data                 | 15*            | Report numbers of outcome events or summary measures                                                                                                                                                         | 8-10           |
| Main results                 | 16             | (a) Give unadjusted estimates and, if applicable, confounder-adjusted estimates and their precision (eg, 95% confidence interval). Make clear which confounders were adjusted for and why they were included | 8-10           |

|                          |    |                                                                                                                                                                            |       |
|--------------------------|----|----------------------------------------------------------------------------------------------------------------------------------------------------------------------------|-------|
|                          |    | (b) Report category boundaries when continuous variables were categorized                                                                                                  | -     |
|                          |    | (c) If relevant, consider translating estimates of relative risk into absolute risk for a meaningful time period                                                           | -     |
| Other analyses           | 17 | Report other analyses done—eg analyses of subgroups and interactions, and sensitivity analyses                                                                             | -     |
| <b>Discussion</b>        |    |                                                                                                                                                                            |       |
| Key results              | 18 | Summarise key results with reference to study objectives                                                                                                                   | 11    |
| Limitations              | 19 | Discuss limitations of the study, taking into account sources of potential bias or imprecision. Discuss both direction and magnitude of any potential bias                 | 13-14 |
| Interpretation           | 20 | Give a cautious overall interpretation of results considering objectives, limitations, multiplicity of analyses, results from similar studies, and other relevant evidence | 11    |
| Generalisability         | 21 | Discuss the generalisability (external validity) of the study results                                                                                                      | -     |
| <b>Other information</b> |    |                                                                                                                                                                            |       |
| Funding                  | 22 | Give the source of funding and the role of the funders for the present study and, if applicable, for the original study on which the present article is based              | 14    |

\*Give information separately for exposed and unexposed groups.

**Note:** An Explanation and Elaboration article discusses each checklist item and gives methodological background and published examples of transparent reporting. The STROBE checklist is best used in conjunction with this article (freely available on the Web sites of PLoS Medicine at <http://www.plosmedicine.org/>, Annals of Internal Medicine at <http://www.annals.org/>, and Epidemiology at <http://www.epidem.com/>). Information on the STROBE Initiative is available at [www.strobe-statement.org](http://www.strobe-statement.org).
